# Supplementary material
Source: PubMed Central journal article supplement (PMC4132678)
Supplement: rspb20141122supp1.pdf [file rspb20141122supp1.pdf]

## Supplemental Dataset 1

>1\_Loxodonta\_africana\_AAGU03027606\_endogenous  
GIRKLSRIRGLGRVCLPLWSR--FHNVTPLGLIFLGYFMEGLHEALAGAGVKIRSAYISTS  
ESQGQTIKATASPPPLVAFEEASVYKLRCDVLLGVV-GSSAKIHSNAEQVRRKLNAFMVI  
DWKR-VQGTANLLIGYPAGPIIDWINRQSWVESLVFKLLSTNFASPEKKVMEQVHM-DSY  
APMTAYDMVHGSLD-CVDGMIA-SDLLTEIPAFMETSKNVKAWLGNLLEYGEAV-HSAVA  
QFAPWKFPSLSAAASY-TKKHTVPSGAFAAPE-TPRATVTIPVLAGASGSLIVRSGGLSG  
PVSADIANILTML

>2\_Loxodonta\_africana\_AAGU03066204\_endogenous  
GIGKLEDLALNVKTFDFPVMRSRFNEAAPGLTFLCYLIEGLHEALASTGVKIRSAYIST-  
GE-WGTVKGTASLLPLIALEVASIYKFGCDVLFVGVFGSSAEIRSDVEQVQKRYSTFMVS  
IRKDKYKDAANLLVVYPAGLVLDWIN-QLWVGSVHNLVSTDFGSPKKEMERVCMV-ASY  
TQMTTCNTIGRYLQQCMDGTIA-QDLLS-IPAFIES-KNVKARPGNFFEYSGAIQHCCLR  
TSPR-----  
-----

>3\_Loxodonta\_africana\_AAGU03022981\_endogenous  
GIGK-EDVEINVKAMFDPEHRSKPDPATPCLIFLCLTAGELHDPLVAAGVKVRSIAKIVQ  
GGVL-----  
-----ALQLLTKRSVQIRQ--VLLGNSMGQFYVSVLRVYESKMLMVQVKVSSY  
S-MTTYDK-RAYLNQFFNG-NC-YHMLLRSQHSLKLRSTQOMYWRSYLQYAGTDPYEEVL  
RLAPKEFPDLSTAANYWNRKNTPS-GGFQASECTPGSTI-----  
-----

>4\_Ictidomys\_tridecemlineatus\_AGTP01124043\_endogenous  
GIGDEKDLRKNVIALLEADRRALYHAVTPSLVFLCLLIPSLHAALIYGGVPRESYLTPV  
TKGDQVLIKTA-DRELSELEVSSIFNHCCSLLIGVVIGSSAKIRAGAEQIRKRFKTLMAS  
INRPAHGDTATLLQTFNPHEAIDWINSQPWVGSVLSLLTDFESPGKEFMEQIRLVASF  
AQMTTYTTTIKEYLNECMDATLMIPAVAGEIKEFLDTASKLKHADHGEIFKYLGAIRHPDAI  
KLAPRSFPNLASAAFYWSKKENPTMSGYRASTIVPGAIVKEAQLARYRRREISRGEDGSH  
IPDEIAQIMKIIG

>5\_Mus\_musculus\_AAHY01095884\_endogenous  
-----TSLMLSHDLRTRFHPATGSLIFMCYLFPLWEALCSAGVPEWSCLSLPV  
QKDGDPAYETSVEHVITSLEMSSI---CCTLLIGLAIGSSEKIRSGSEQV--STRPMVM  
LGKSGHAESETHLNTYPPSAVDWFNSQPWVGTLLFGFLATKLSKPGKELMDHIRMVTSY  
AQMTTYVLIKQYLEQCMDGTTALSQVSYEILPFLSMEKNIKKSLREWFEFIASL-HGDSI  
-----NLSLAALFRSKKESATMMASKAPVIQPGTTLTGSLLCRA-EQQIVRSGIGGE  
LSPNVQDVLKAIG

>6\_Mus\_musculus\_20616448\_endogenous  
GIGKR-DIEVNTVSVLDSEHRARFYPVTGSLIFVCYVFPWMWESLAAADVSEQSCLSTPM  
QKDGSPAYETS-ERPLTALEMFSIVSHCCPFMNGLVTPPEKIRSGLAQIKHRVKTLMVT  
LGKSGCVAATHLNTYPPSADIDWLKSQPWLGILTV-VL-STFWSPGKEVMVQIRMVASY  
AQVTMYVPIKQYLGQCMDGTFA-----LPAEFEIPTFLSVEKNLRKHTGE-RHS-TI  
KLASRAPNLSSAALFRSKLESAMMAPKTPVIQP---LTPLELLY-AQEHQVIRQGTVRE  
TSPG-----

>7\_Mus\_musculus\_AHBB01025016\_endogenous  
-----  
GAAYETSFAFCK-GRVLTSLLEMSSIVGPDWTCW--IV-EDL-KWVGANQMPK--IKTFMVT  
LGKSGHTDTATHL----PTKCSH-LSQLPAL-FLLFGFLSTKFOSPGKEVMGQIGMVASY  
AQMTTYILIKQYLEQCVDGTTALPQAAFEIPFSLSLEKNLKKRLVNDLNLFGIMTPSDLL  
RRHSRTFPQ--AFFSFLSKRESARMTAFKAPIIQPGSTLL----HRARERQIIRSGIGGE  
MSLKVQAVLRATG

>8\_Homo\_sapiens\_AADD01105699\_endogenous  
IGDVK-DIEKATKSMLDPAQRSHFYLVTPSLVFLCFIFDGLHKALLSVGVSKRSNIVIGN  
ENKETGTLYAS-DVLPTFLEMSSILRHCCDLLIGIAARSSDPICNTSLQVQRQFKAMMIS  
IGRPLHSESADLLISYNAGPAIDWINSRPWVGGLMFTFLFGEFESPACELLDQVKVASK  
AQMTTYTTRMFLDQCVDGSTALLPAVVLEIPVFEQKKPLAKKVLGDFEFEGGVLRRHPVIG  
VLSQPMFPNLATAANYWAKRRNSTFSGFEALDIIPGSTITFPVLQMASAQKISR---GSD

MDPYTLNLRGYG

>9\_Homo sapiens\_ABSL01057266\_endogenous

IGDIK-DIKKAAKSMMLDPAHKSHFHPVTPSLVFLCFIFDGLHQALLSVGVSKRSNTVVGN  
ENEERGTPYAS-DM-PNFLEKSSVLRHCCDLLIGVAAGSSDKICTSSLQVQRRFKAMMAS  
IGRLSHGESADLLISCNAESAIGWISSRPWVGELMFTFLFGDFESP--TQATQVKLVAKK  
AQMTPINAVRFMDQCMDGSIALRAIVSEIPVLRKKTVMVKKALGKYFEFGGVLCHPIIG  
ELSPRMFPNLATAANYWAKMSNPTFLGFKAPDVIPGSTI-----

>10\_Cavia porcellus\_AAKN02042182\_endogenous

IGKLE-SYQIMSNHFLTNKHRPLFHPVYWFVAV--YVVAFSWTLKILRDVESQKSHHSQQ  
LSKT--TTGVT-LEAGLETNVSSTCGHCCDLLLVL-----ASAQVRR-VQIVHQS  
NGQPSHNATAVVLVSYANKATDWFLQQSWVGSMMFEFKKTDQSPWKKFMDQVRL-ASY  
TQMTTYTMTKQYLEQCMNGTLT-FWL-----TKRGSKIQGSRAEWFEEFTGVLCHPVTL  
ELAPRVFLNLASAGRYWSRKESATISGYRIPS-----

>11\_Crotallus mitchellii\_contig\_173953\_endogenous

GIGKSAEIEHATKCFLNQHSRIYHPVTPSLVFLCYLIPGLWSAFREAGVPTISYFAD-I  
GGKIETSSFIN-NDPLTTLELSSVIAHCTTLLIGVIIHQHQL-----SAQIKKRIKALFVT  
LGKPTHAEANALQFLPPTAAID-INSQPWARNLILGLLTTTFESPGKEMMAQLSMIAEH  
AQMTTYSTINSYLNQCMDATIA-SLLL-R-IEFERVTRDLKIKLKLKLFKYAGAIRHPDVI  
QIAPKAFPNLATAALNWSKRKSTSMGAYKSPDIIPGATITEFMLSRRKSRIVRSGGEE  
MGSAT-NILLKYG

>12\_Crotallus mitchellii\_contig\_72541\_endogenous

GIRKKTIEHATKCFLNPERRTLYHPMTPSLVFLCYLIPGLWTAFAKNAGVPTSSYFTQLI  
GGHVQSQSLTN-DVPLTALELSSVIAHCTTLLISIVLESSTKIAAGSAQIKKRIKAMFVT  
LGKPTHADIANALQFLPPTAAVDWLNQSPWIGNLILVFLDTTFKTPGKEMMDQVHLVAGY  
AQMTTYSTIQAYLEHCMDGTIA-YLLLSK-IEFAKVSQIHLKLRQWFKFAGAIRHSEVI  
KLAPKAFPNL---ALYWSKQESTSMGAYKAPDIVPGAIIEFTLAHTRRGIVRVGIGYE  
MGPNTTRILSAYG

>13\_Python bivittatus\_AEQU02058304\_endogenous

-----F-CALFSMDYTOFKTVGVSETSGLLTPK  
EGRPKGTSTLHKDAGLTATELTLLLCRCCDLFIGLAIGSSDKIRINSAQVHKHFETLMVS  
LQKKTTSK-AMPITLYNAGHAIDWINSKPWIGHLVNLIELEAESPAKELIDQMCLVANK  
AQMTCFSSV-EAYLKQCMDGTIAMRQVVAEIPKFEAAVSIVKKKTGSMFKFASAIRHPAII  
NLAPRNFPNLSTAANYWKKWHSFSAFGFKALKVTPGAAIPMLQLAATRILREVRPIQSGK  
LGMLRVPLAK---

>14\_Human Bornavirus\_FJ792853

GIGDEKDIRKNAVALLDQSRRELYHNVTSLVFLCLLIPGLHSAALLFAGVQRESYLSTPV  
KQGERLITKTANDRELTELQVSSIFNHCCSLLIGVVIGSSAKIKAGAEQIKKRFKTLMAS  
INRPGHGETANLLSVFNPHEAIDWINAQPWVGSFVLALLTTDFESPGKEFMDQIKLVAGF  
AQMTTYTTIKEYLNECMDATLTIPAVALEIKEFLDVTTKLKAHEGDMFKYLGAIRHSDAI  
KLAPRNFPNLASAAFYWSKKNPTMAGYRASTIQPGSIVKEAQLARFRRREITRGDDGST  
MSPEIADVMRLIG

>15\_Avian bornavirus\_KC464480

GIGDEKDIKKNALAFDPSRREKFHVSPTSLVFLCLLIPGLHRALLYGGVPRESYLSTVV  
DRGGEQI IKAGRDRELSELEVSSIFNHCCSLLIGVVIGSSAKIKAGAEQIKKRFKTLMAS  
LNRPAHGETATLLQMFNPHEAIDWINGQPWVGSVLSLITTTDFESPGKEFMDQIKLVASY  
AQMTTYTTIKEYLSECMDATLTIPAVAYEIKEFIKVSSDLKTEHGELFKYLGAIRHSDAI  
KLAPRNFPNLASAAFYWSKKNPTMSGYRASTIQPGSTVKEAQLARYRRREISRGEDGVH  
LSEIEAIEIMRMIG

>16\_Avian bornavirus\_KC464481

GIGDEKDIKKNALAFDPSRREKFHVSPTSLVFLCLLIPGLHRALLYGGVPRESYLSTVV  
DRGGEQI IKAGRDRELSELEVSSIFNHCCSLLIGVVIGSSAKIKAGAEQIKKRFKTLMAS  
LNRPAHGETATLLQMFNPHEAIDWINGQPWVGSVLSLITTTDFESPGKEFMDQIKLVASY  
AQMTTYTTIKEYLSECMDATLTIPAVAYEIKEFIKVSSDLKTEHGELFKYLGAIRHSDAI

KLAPRNFPNLASAAFYWSKKNPTMSGYRASTIQPGSTVKEAQLARYRRREISRGEDGVH  
LSEEIAEIMRMIG

>17\_Human\_Borna disease virus\_AY374549

GIGHEKDIRQNAVALLDQSRDMFHTVTPSLVFLCLLIPGLHAAFVHGGVPRESYLSTPV  
TRGEQTVVKTAQRDLTELEISSIFSHCCSLLIGVVIGSSSKIKAGAEQIKKRFKTMMAA  
LNRPSHGETATLLQMFNPHEAIDWINGQPWVGSLVLSLLTTDFESPGKEFMDQIKLVASY  
AQMTTYTTIKEYLAECMDATLTIPVVAYEIRDFLEVSAKLKEEHADLFPFLGAIRHPDAI  
KLAPRSFPNLASAAFYWSKKNPTMAGYRASTIQPGASVKETQLARYRRREISRGEDGAE  
LSGEISAIMKMIG

>18\_Avian bornavirus\_KC464475

GIGDERDIKKNALAFDPSRREKFHNSVTPSLVFLCLLIPGLHGALLYGGVPRESYLSTVI  
DRGGEQLIKVGRDRELTELEVSSIFNHCCSLLIGVVIGSSAKIKAGAEQIKKRFKTLMAS  
LNRPSHGETATLLQMFNPHEAIDWINGQPWVGSLVLSLITTTDFESPGKEFMDQIKLVASY  
AQMTTYTTIKEYLSECMDATLTIPAVAYEIKEF-KTSSDLKNEHGELFKYLGAIRHPDAI  
KLAPRNFPNLASAAFYWSKKNPTMSGYRASTIQPGSSVKEAQLARYRRREVSRRGEDGLH  
LSDEIADIMRMIG

>19\_Avian bornavirus\_KC464472

GIGDEKDIKKNALAFDPSRREKFHNSVTPSLVFLCLLIPGLHGALLYGGVPRESYLSTVI  
DRGGEQLIKVGRDRELTELEVSSIFNHCCSLLIGVVIGSSAKIKAGAEQIKKRFKTLMAS  
LNRPSHGETATLLQMFNPHEAIDWINGQPWVGSLVLSLITTTDFESPGKEFMDQIKLVASY  
AQMTTYTTIKEYLSECMDATLTIPAVAYEIKEFIKTSSDLKNEHGELFKYLGAIRHPDAI  
KLAPRNFPNLASAAFYWSKKNPTMSGYRASTIQPGSSVKEAQLARYRRREVSRRGEDGLH  
LSDEIADIMRMIG

>20\_Spermophilus tridecemlineatus\_AB516287\_endogenous

GIGDEKDLRKNVIALLEADRRLYHAVTPSLVFLCLLIPSLHAALIYGGVPRESYLSTTPV  
TKGDQVLIKTAKDRELSELEVSSIFNHCCSLLIGVVIGSSAKIRAGAEQIRKRFKTLMAS  
INRPAHGDTATLLQTFNPHEAIDWINSQPWVGSLVLSLLTTDFESPGKEFMEQIRLVASF  
AQMTTYTTIKEYLNECMDATLMIPAVAGEIKEFLDTASKLKADHGEIFKYLGAIRHPDAI  
KLAPRSFPNLASAAFYWSKKNPTMSGYRASTIVPGAIVKEAQLARYRRREISRGEDGSH  
IPDEIAQIMKIIG

>21\_Avian bornavirus\_KF680099

GIGREEDIRKNALNFLDPGRREKFHNVTTPSLVFLCLLIPGLHAALLYGGVPRESYLSAPI  
MQEGEMLVKVDRDRELSELEISSIFSHCCSLLIGVVIGSSAKIKAGAEQIKKRFKTLMAS  
LNRPAHGETATLLQTFNPHEAIDWINGQPWVGSLILSLITTTDFESPGKEFMDQIKLVASY  
AQMTTYTTIKEYLSECMDATLTIPAVAYEIRDFLKVSELKAEHGELFKYLGAIRHSDVI  
KLAPRNFPNLASAAFYWSKKNPTMSGYRASTIQPGSTVKEAQLARFRRREVSRRGEDGAN  
LSDEIADIMRMIG

>22\_Bornavirus parrot\_FJ169440

GIGNEKDIHKNVALLDQSRRELYHNVTTPSLVFLCLLIPGLHSALLFAGVQRESYLSTTPV  
KQGERLITKTANDQELTELQISSIFNHCCSLLIGVVIGSSAKIKAGAEQIKKRFKTLMAS  
INRPGHGETANLLSVFNPHEAIDWINAQPWVGSLVLLALLTTDFESPGKEFMDQIKLVAGF  
AQMTTYTTIKEYLNECMDATLTIPAVALEIKEFLDITTTLKAHEGDMFKYLGAIRHSDAI  
KLAPRNFPNLASAAFYWSKKNPTMAGYRASTIQPGSIVKEAQLARFRRREITRGDDGTT  
MSPEIADVMKRIG

>23\_Avian bornavirus\_KC464471

GIGDERDIKKNALAFDPSRREKFHNSVTPSLVFLCLLIPGLHGALLYGGVPRESYLSTVI  
DRGGEQLIKVGRDRELTELEVSSIFNHCCSLLIGVVIGSSAKIKAGAEQIKKRFKTLMAS  
LNRPSHGETATLLQMFNPHEAIDWINGQPWVGSLVLSLITTTDFESPGKEFMDQIKLVASY  
AQMTTYTTIKEYLSECMDATLTIPAVAYEIKEFIKTSSDLKNEHGELFKYLGAIR-PDAI  
KLAPRNFPNLASAAFYWSKKNPTMSGYRASTIQPGSSVKEAQLARYRRREVSRRGEDGLH  
LSDEIADIMRMIG

>24\_Human\_Borna disease virus\_AJ311522

GIGHEKDIRQNAVALLDQSRDMFHTVTPSLVFLCLLIPGLHAAFVHGGVPRESYLSTPV  
TRGEQTVVKTAQRDLTELEISSIFSHCCSLLIGVVIGSSSKIKAGAEQIKKRFKTMMAA  
LNRPSHGETATLLQMFNPHEAIDWINGQPWVGSLVLSLLTTDFESPGKEFMDQIKLVASY

AQMTTYTTIKEYLAECMDATLTIPVVAYEIRDFLEVS AKLKEEHADLFPFLG AIRHPDAI  
KLAPRSFPNLASAAFYWSKKENPTMAGYRASTIQPGASVKETQLARYRRREISRGEDGAE  
LSGEISAIMRMIG

>25\_Sorex araneus\_AALT02140945

-----QITKR FNV MHIS  
VKRGLQPPTVEISPSFDFREAAAWLTPSFIVRGLLELENHSSTGPTAKVFTGQIKLVATY  
AEMTPYMTKAFINEELSHGVMLPGVATEVKAFLEVENNLKAEHGEENY YFKALKLKR V-  
TKALHLFLNLCKVVNTRKQKVDGAFHDYRST-----

>26\_Sorex araneus\_AALT02088745

-----ATQIN-RFNSMYPT  
IKKGVQPPLIKLSTTFNFRGATTWLISSPVI-GIPDLDDKKPRINEPCHAMIAQIKLIANY  
AEMTPYVTMKGFI SEGLSHGALLPGVVTEIEVFLQVEKPLKEEHGKENFHLKILRLSGHD  
QLAPAKFPNLCKAV-----

>27\_Otolemur garnettii\_AAQR03106311

-----IRKPQKNPMSQITRRFNALHST  
IRPGVQPPQVDLDP AIDFKAAASWLSK TILSALLASEGQETIGPTGRAFIEQIKLVSGY  
AEMTTYLTMKAFINEGLSKGALLPGVGT EMKAFLDAEKDLKERHGVGLFY LKALRLEGYE  
TLAPVHYPNLCKVANSRKRKMDVAFRDYRCA-----

>28\_Myotis brandtii\_ANKR01245074

-----QIGRRFSALYST  
VKPGVQPPPVDIDPLFDLKETALWLLAKIIPSTLLEMEDHTPLWPTAKAFISQLKLVSSY  
AEMTPYLTIKSFISDGLSKASMLPGVGA EIQAFLKAEDELKEQHGD KM FYLKCLRLPGHE  
RLAPVNFRNLCKVANARKRWIDGTFGDYKST-----

>29\_Dipodomys ordiiABRO01003680

-----AKAFLNQVRMF SAY  
AEMTPYIVMREFIQAGLSHAATLPGVGS DILKCHEAETDLRRRHGDEVFFIKALSSPGGE  
RLEAAAYPNL FKVASSQKRR-DHTYKDY-----

>30\_Rhinolophus ferrumequinum\_AWHA01050524

ID-----EYATKSVFNLAH-SLFHPVTASLMFFCFLFDGLHEKFLSVGVPWESH LITP-  
-----VS-----FLELSSII-HCCDLLIGGVTGSSDKVRVNSL-IRKCFKTL MVI  
LQOPHGDQANLLFNYNAGPANDWVNSQH WV--K-FVLVVIN FESPSK EML-QIRLVASI  
AHMMTYL-MIQMFLEQ-----FFGGVLRHPAML  
EISPRMFPNLGMLASYWARRSNPTFSGFKAPDIIPGATVHWP-ST-RQOEKSRGSG-SSE  
MDLRTLNLKQCG

>31\_Megaderma lyra\_AWHB01421187

IR-----CAIKSMFVPTHLSLFHPVTASPIFLCWTILHEN--FLSVGVPKESH LIAP-  
VGGKIKTKSLY-GKVPSFLEMP SII RHCCDL-IG-VGGSSDMVRTNSFQVQKRFKTL MVT  
LQRLAPGDSVNL-FNYNAGPAINWI---PWVGS--FVFAVLTFESSGKEMLDQVRLVAWR  
AQMT PSTILLGCS-----WISAWMDPYLQ---LL-QIISLRRN-RQYRSCLDNISNTKEY  
-DTPWMFPNPAPVASYWTRRSNAPYSGFKVPVVFLEPAS-----QSH  
-YRWHLYARYHRG

>32\_Rattus norvegicus\_AABR06065682

VGIGRRDIDISTLSVLSREHRTRFHPATGSLMFCYLFPELWEALCSAGVPEWSYLSSPV  
Q GKDRAAAYEPL-ELVIISLEISSTVGHCC TLLIGLVISC-ENL-RL-MSQHPVKTLLVI-

LGKSGYAVSETCLNTYQPSASVDWFTSQSWVGSLLFGFLATKFKSPGKELID-IPMVASY  
AQMTVYVLIKQFLELCMDGTIALSQVVYGMPPFLSMEKNLKRSLGEWFEFTGALRHGDSI  
KLAPRAFPNLFSTALFWNK-ESATMMAFKAPVIQPGSTLTPLELLCRA-EQQIRRPRIIGGE  
MSPNVQAVLRAIG

>33\_Rattus\_norvegicus\_AAH-01065642

IGKRR-ETDIDTSLMLNHEHRAVSSSHW-QLDIYVLPPIPRDVESPAVAGVSERSYLTPV  
QDKDGPSEYETP-E-VLVSLEMSSIVGHFCILLIRLVISSGKI-SGLKQIKHQVAELRPSG  
LGKTRPC-S-NAPQLLPAKCCCHSLAQLPALVRSLLFGFLSIKFRSP-KEIMNQTWMEASY  
AQMTTYVVLNKQ-LEQCMDGTIALSKVAFEILPFLSVEKIFKKHLSEWFEFIGALWQNDISI  
KLVPGAFNLFSAALFGSKLQSAMMAFKAFYHST-FNLP-WSLIT-G-SQIIQSGIGGE  
MSSGIQAVLKVID

>34\_Rattus\_norvegicus\_AABR06095622

IGKRR-GTEINALSLLNREHGAKLHPAPTSLLFVCYLIPGLQEALSAGGVIRCRSVQTKD  
SLAGETAVALPV-STQSLHSSCFPMLGHGRTLVIGLAISSEKMHVHSGSKQTEGRFKTLVVT  
IGKSGHGESATHLSMSQPRASVHWLNSQPWGVVSLLLGLLSTKFKSPGKDL----HMVASI  
AQMLAYVMIKQHLDRCMARTTALLOAANEILPFLSTERDLKKGGLGEWFESIGAIKHSISM  
TLDPQAFPNLSLAHFWSKRESAATTVCAPVIQP-----

>35\_Human\_AADB02012985

IGDVK-VIEKATKSMMLDPAQRSHFYLVTPSLVFLCFIFDGLHKLALLSVGVSKRSNIVIGN  
ENKETGTLYAS-DVLPTFLEMSSILRHCCDLI-GIAARSSDPICITNSLQVQRQFKAMMIS  
IGRPLHSESADLLISYNAGPAIDWINSRPWVGGLMFTFLFGEFESPACELLDQVKVASK  
AQMTTYTVMFLDQCVDGSTALLPAVVLEIPVFEQKKPLAKKVLGDFEFGGVLRHPVIG  
VLSPQMFPNLATAANYWAKRRNSTFSGFEALDIIPGSTITFPVLQMASAQKISRGSMDMP  
YTLNLRGYGISG

>36\_Papio\_anubis\_AHZZ01069395

IGDVK-DIKKAAKSMMLDPAKSHFHPVTPSLVFLCFIFDGLHETLLSVGVSKRSNIVVEN  
KNKEMDTPCAS-DM-PNFLEKSSVLRHCCDLLIGVAAGSSDKICASSLQVQRRFKAMMAS  
IGRLSHGESADLLMSYNAESAIDWISSRPWVGELMFTFLFGEFESP-----QVKLVAKK  
AQMTTYAVRMFLDQCMDGSIALPAIVSEIPVFEEKTMVKKTLGKYFEFGGVLCHPVIR  
QLSPQMFPNLAATANCWPKRSNPTFSGFKAPDVIPGSTI-----

>37\_Macaca\_fascicularis\_AEHL01267442

IGDVK-DIKKAAKSMMLDPAKSHFHLVTPSLVFLCFIFDGLHETLSLVGVSKRSNIVVEN  
KNKEMDTPCAS-DM-PNFLEKSSVLRHCCDLLIGVAAGSSDKICASSLQVQRRFKAMMAS  
IGRLSHGESADLLMSYSAESAIDWISSRPWVGELMFTFLFGEFESP-----QVKLVAKK  
AQMTTYAVRMFLDQCMDGSIALPAIVSEIPVFEEKTMVKKTLGKYFEFGGVLCHPIIR  
QLSPQMFPNLAATANCWPKRSNPTFSGFKAPDVIPGSTI-----

>38\_Nomascus\_leucogenys\_ADFV01176629

IGDVK-DIEKAAKSMMLDPAHRSHFHLVTPSLVFLCFILDGLHKLALLSVGVSKRSNIVIGN  
ENKETGTLYAS-DVLPTFLEMSSILCHCCDLLIGIAARSSDPICITNSLQVQRQFKAMMIS  
IGRPLHSERADLLIS-NAGPAIDWINSRPWVGGLMFTFLFGEFESPALLELDQVKVANK  
ARMTTYTVMFLDQCVDGSIVLPAVVSEIPVFEEKKALVKKALGDFEFGDILCHPVIG  
ELSPRIFPNLATAANYWAKRRNPTFSG-KPSTFIPGSTITFTLLQMASAWKISRGS---

>39\_Procavia\_capensis\_ABRQ01717982

-----TAENRFKAFKAA  
----TMEHA-PYPAINVSAYVIYLSLQPWCHRVLRRILSTKFTGPAEQMMVQVHMVARW  
SQMTTLSAIKRFINECDSSLILPEVKAIEPKFFEAYERLREKTGEWFPYAKAIKHPEAQ  
KVKTAAFPNLASAALYHAAETPTMRNYRAGKNIRGGLPSTLKS SAFECKISRERAAIYS  
QGFTGEVS-----

>40\_Procavia\_capensis\_ABRQ01490479

-----

-----  
-----VIYLSLQPWCHRVLRRILSTRFTGPAEQMMVQVHMVARW  
SQMTTLSAIKRFLNECDSSLILIPVKAIEIPKFCEAYERLREKTGEWFFPYAKAIKHPEAQ  
KVKTAAFPNLASAALYHAAETTPTRNYRAGKNIRGGLPSTLKS SAFEQKISQEERAAIYF  
RGEVS-----

>41\_Bitis gabonica\_AB516291

-----  
-----MFKYLGAVRHPDAI  
KLAPRSFPNLASAIFYWSKKNATMTGYKASTIQPGATVKEAQLARLRRREIVRGGERE  
LDDKAVDVMARIG

>42\_Microcebus murinus\_ABDC01288276

GIGKVEALERNGKMLLSAEWRSKFNDVTLGLVFLCFVIDGLHDALNGVGSKRE----TTV  
QVYENRVLKMAATPEFSMMEIASIYRVVCDTLIGVVFRSSSKVRANA EWFRRLMHLNGL  
ARAQRYSKPLAWLSIWGFG---DWLISQPWACTLVLQVLNVSIO SPGKELMEQICMFAKG  
A-ITTYNMIKGYLDHCMDGTILISSVALEI-----

-----Alignment of circovirus capsid sequences:

>1\_Crotalus mitchellii\_contig\_224958\_eSCV1

--WDYYRIRKLVKVEFFPTFLGSQEEYSRGTTVIDL DGNIPAAATTPAYDPFMDRSSAHPH  
RYHSRYFTP K PQLFFQPNNKYNQWLNPKDANVLHWGLGFSMESLTATQWLVKITYYVQFR  
EFIF

>2\_Crotalus mitchellii\_contig\_224959\_eSCV2

YLWDYCRIRKMKVEFFPTFLGSQEEYSRGTTVIDL DGNLPQPGTTAANDPFEDRSTAHPH  
RYHSRYFTP N PQLFFQPNNKYNQWLN CNDDTMLHWGLGFSMESFTASQWLVKITYYVQFR  
EFIF

>3\_Muscovy duck circovirus\_EF451157

YPYDYMIKGVAITLRPAYNIYQKSKTQGSTVIDKDGQIVKTATTGWIDPYGSTSSRRPS  
RVHRRYFV PKPIIFFL-GGRNFTWINCTQDQVVHYGMGMSLDNTTGVNIEAQFTFYIKFG  
QFTG

>4\_Mulard duck circovirus\_AY228555

YPYDYMIKGVAITLRPAYNIYQKSKTQGSTVIDKDGQIVKTATTGWIDPYGSTSSRRPS  
RVHRRYFV PKPIIFFL-GGRNFTWINCTQDQVVHYGMGMSLDNTTGVNIEAQFTFYIKFG  
QFTG

>5\_Duck circovirus\_HM162351

YPYDYMIKGVAITLRPAYNIYQKSKTQGSTVIDKDGQIVKTSTTTGWIDPYGSTSSRRPS  
RVHRRYFIPKPIIFFL-GGRNFTWINCTQDQVVHYGMGMSLDNTTGVNIEAQFTFYIKFG  
QFTG

>6\_Mulard duck circovirus\_HQ180266

YPYDYMIKGVAITLRPAYNIYQKSKTQGSTVIDKDGQIVKTSTTTGWIDPYGSTSSRRPS  
RVHRRYFIPKPIIFFL-GGRNFTWINCTQDQVVHYGMGMSLDNTTGVNIEAQFTFYIKFG  
QFTG

>7\_Muscovy duck circovirus\_GQ423744

YPYDYMIKGVAVTLRPAYNIYQKSKTQGSTIIDKDGQIVRTSTTTGWIDPYGSTSSRRPS  
RIHRRYFV PKPTIIFFL-GGKNFTWINCSQDQVVHYGMGMSLDNATGDEIEAQFTFYIKFG  
QFTG

>8\_Duck circovirus\_GU131341

YPYDYMIKGVAVTLRPAYNIYQKSKTQGSTIIDKDGQIVRTSTTTGWIDPYGSTSSRRPS  
RIHRRYFV PKPTIIFFL-GGKNFTWINCSQDQVVHYGMGMSLDNATGDEIEAQFTFYIKFG  
QFTG

>9\_Duck circovirus\_JX241046

YPYDYMIKGVAVTLRPAYNIYQKSKTQGSTIIDKDGQIVRTSTTTGWIDPYGSTSSRRPS  
RIHRRYFV PKPTIIFFL-GGKNFTWINCSQDQVVHYGMGMSLDNATGDEIEAQFTFYIKFG  
QFTG

>10\_Goose circovirus\_DQ192284  
YPFDYIRMVVKVELRPAFNPFFQVRVTOGSTYIDKEGNI-TTTTSGSVDPYAAMSSRKP  
RYHKRIFIPKPTIWYTPGGR--QWLNSIQDNVVFYGMGMSLEDTAAPLIEATITYYIRFG  
QWTG  
>11\_Bat circovirus\_JX863737  
IPWAYRIRKMKFEILPKMIPAQTPYRYGSTAIYL-G-MQAPAP-TQYDPHLKHVKQ  
DQLKRYFTPKPDLWFQPNKANQWINMTNDNITHGQVGWMSISM-AQFKIRVTLYVQFR  
EFNL  
>12\_Bat circovirus\_KC339249  
-PFKYRIRKVKVEFQPRLPITSPFRGYGSTVPILDGAFVTPATGESWDPYINFSGRHP  
WYHKRYFTPKPLIWF-PN-KQGQWS-----GLGFAMNEAYNYQ--VRF'TLYVQFR  
EFDL  
>13\_Porcine circovirus\_JN133302  
LPFQYYRIRKAKYEFYPRDPITSNERGVGSTVVILDANFVTPSTNLAYDPYINYSRHP  
TYHSRYFTPKPELWFHPNNKRNOQLHLNTHTNVHTGLGYALQNAATAQYVVRLTIYVQFR  
EFIL  
>14\_Porcine circovirus\_1\_AF012107  
LPFQYYRIRKAKYEFYPRDPITSNQRGVGSTVVILDANFVTPSTNLAYDPYINYSRHP  
TYHSRYFTPKPELWFQPNNKRNQWLHLNTHTNVHTGLGYALQNAATAQYVVRLTIYVQFR  
EFIL  
>15\_Porcine circovirus\_2\_GQ861253  
IPFEYYRIRKVKVEFWPCSPITQGDRGVGSSAVILDDNFVVKATALTYDPYVNYSSRHP  
SYHSRYFTPKPVLYFQPNNKRNQWLRLOQTSRNVHVGLGTAFENSKYDQYNIRVTMYVQFR  
EFNL  
>16\_Rhinolophus ferrumequinum circovirus\_JQ814849  
NYFDMYRIAKVRVQWLPMSIS-EVRAWGATVIDLTDTTVP-STGRT-DFTID-DSTRPT  
RIHSRYFTPKPEIAVQPNNPRNQWIDSRD-KDVHGGIAYYFDDIGDDVFSYIVTYFFQFR  
QFAG  
>17\_Porcine circovirus\_2\_GQ861252  
IPFEYYRIRKVKVEFWPCSPITQGDRGVGSSAVILDDNFVVKATALTYDPYVNYSSRHP  
SYHSRYFTPKPVLYFQPNNKRNQWLRLOQTSRNVHVGLGTAFENSKYDQYNIRVTMYVQFR  
EFNL  
>18\_Porcine circovirus\_JX524206  
IPFEYYRIRKVKVEFWPCSPITQGDRGVGSSAVILDDNFVVKATALTYDPYVNYSSRHP  
SYHSRYFTPKPVLYFQPNNKRNQWLRLOQTSRNVHVGLGTAFENSKYDQYNIRVTMYVQFR  
EFNL  
>19\_Canine circovirus\_JQ821392  
PPFRFYKFKKVIYIRAWINWPKTLMENVLGRALDLDQGRGNATRSHLDPGTVEPPKDPF  
IYDPLQDRSSSRSGFKRGLTPKPFQDITSPSAAPWLTRGTPWVSVIQANMVWNGLSISL  
R-QMAlignmentofcircovirusRepsequences:  
>1\_Crotalus mitchellii\_contig\_24347\_Endogenous\_eSCV4  
-----  
-----EKRSDLKEAIALNSGSSMTELARAYPSVYIRY  
GMGLIDYVIRDFKTDVHVITGIPGCGKSKFCSELYWKPHGKWWGTYTGQEIIVILDDFYGW  
IPFDELLRICDRYSYRVETKGGTMEFVSKSI-----  
>2\_Crotalus mitchellii\_contig\_9220\_Endogenous\_eSCV3  
AKDMYLLLTIPPKKXMXLXKDFITPENCVYAIVGEE-QVLHLQGFVNLKKKMRFNPFKAA  
IGGRAHVEKAKGTDLDNKRYCSKQ-KVGKRLDLKEAIALNSGSSMTELAQAYPSVYIRY  
GRGLKDYVIRDFKTDVHVITGIPGCGKSKFYSELYWKPRGKWWGTYTGQEIIVILDDFYGW  
LPFDKLLRICDRYPYRVETKGGTMEFVSKCIYITSKQA-----  
>3\_Bat guano\_HM228875  
SVNWCFTLNNTNEDVNKLKQVKCR----YICLGFVGDPHIQGFQFEKKVRLSVWKKI  
N-KKIHAEIMKGTIEQAINYCKKSGTFGERRDLKEAKKCAEVG-LRAITDCESTYNLQV  
IRNCQIMLERDFKPEVIWIYGESGAGKTKYISEKYWKDATKWWNGYDRHEITVMDDFRAN  
MKMNELLKLIDRYPHRVEIKGGFRQMLSKKIYISSIMHPKDVYNLPQLLRRIDTIKI-

>4\_Bat guano\_JF938078  
ARYWLLTIPYEHFTP-----YLPPNCAYIKGQLEQGSLSHWQLVVYFVSQKKSLSNYVKLI  
FGDGIHCEPSK-SKAAEYVWKEDTSSISIKRDSTKDWDLIVKHAREGDFASIPGDVLVRC  
YGNLKKIRVESIVREIYVYVYGRGTGAGKSRRAWEEYPKPNTKFWDDGYAGQECVVIDEFRGA  
ISISHLLRWLD RY P V I V E I K G S S C V F K A K K I W I T S N L S P D D W Y P D L A L R R R F T E V V H F N  
>5\_Bat circovirus\_AGL09969  
CERYCFTINNYSEEDIEAVKAFLVPD NAEYAI V G K E - K G P H L Q G F V N L K K K M R F N P F K A A  
LGGRAHIEQARGTDL DN K R Y C S K G G D L G K R S D L K E A V T L L N S G A N M T A V A R A Y P E V F I R Y  
GRGLRDYVIRAWKTEVHVIVGVPGV G K S R H V S E Q Y W K P R G K W W D G Y C N Q E V V C L D D Y Y G W  
IPYDDLRLCDRYPLRVETKGGTVS F V A K K I Y I T S N K Q I K D W Y N F E A L Y R R V T S Y K V M R  
>6\_Rhinolophus ferrumequinum circovirus 1\_AFK85001  
GRRWCFTINNYDTPDLTAVNEAFKEKDVVYAVCGKE-VGKHLQGF IHFTGNWRFNRVKS L  
LGGRAHIEKARGNDEQNKVYCTKE-ETGKRNDLGRAVAALEGGSSLSSEVAQANPEVFIRY  
GRGLRDYMNRFKTHVIVLVGEPGSGKSKYANEVYWKPRGQWWDGYNGEEVVLD D D F Y G W  
VPYDELLRVGDRYPLKVQVKGAFVDFVSKTLVITSNKRPEEWYDKEAMWRRFNEMYCE  
>7\_Bat circovirus\_YP\_007974237  
AKRWVFTLNPNPSPKEIDHILGQDMN-MFDYLVCGKEGMGPHLQGFANFSKKKTFNQVKKI  
FGSRCHIEKAKGTDKDNQOYCTKEGDVGQRTDLASAVSTVLESGLRAVAESHVPQFVRY  
HRGLSELLKRDKWTSVHVIIIGPPGCGKSKYANFNFWKPRNKWWDGYCGQEVVILDDFYGW  
LPYDEMLRLCDRYPLTVETKGGTVPF L A R T I L I T S N K V P Q E W Y S S E A L F R R I T T L Q L W K  
>8\_Canine circovirus\_AGI42842  
VRRWCFTINNP T P E E E D A V K N L A P - - D A K Y L I C G R E V G E P H L Q G F V N L K R T T R M G A L K A R  
LGGRGHFEPARGDDCSNRDYCSKGGDIGKRNDLHDAVVKLKETKSLAAVASAYPETYVKY  
SRGLRELLLRKWKTEVEVLCGPPGCGKSRYCMETYWKPRGKWWDDGYDGHQDVILDDFYGW  
LPFDDMLRLCDRYPLRVETKGGTMNFLARRIYITSNR L P H E W Y S D E A L Y R R L S I I K V W D  
>9\_Canine circovirus\_YP\_007697652  
VRRWCFTINNP T P E E E D A V K N L A P - - D A K Y L I C G R E V G E P H L Q G F V N L K R T T R M G A L K A R  
LGGRGHFEPARGDDCSNRDYCSKGGDIGKRNDLHDAVVKLKETKSLAAVASAYPETYVKY  
SRGLRELLLRNWKTEVEVLCGPPGCGKSRYCMETYWKPRGKWWDDGYDGHQDVILDDFYGW  
LPFDDMLRLCDRYPLRVETKGGTMNFLARRIFITSNR L P H E W Y S D E A L Y R R L T L I K V W D  
>10\_Canine circovirus\_AGI42840  
VRRWCFTINNP T P E E E D A V K N L A P - - D A K Y L I C G R E V G E P H L Q G F V N L K K T T R M G A L K A R  
LGGRGHFEPARGDDCSNKDYCSKGGDIGKRNDLHDAVATLQTKSLAAVAAAHPETYVKF  
SRGLRELLLRNWKTEVHVLCGPPGCGKSRYCLETYWKPRGKWWDDGYDGHSDVILDDFYGW  
LPFDDMLRLCDRYPLRVETKGGTMNFIARRMFI T S N K L P H E W Y S D E A L Y R R L S L I T V W D  
>11\_Canine circovirus\_AFK82575  
VRRWCFTINNP T P E E E D A V K N L A P - - D A K Y L I C G R E V G E P H L Q G F V N L N R T T R M G A L K A R  
LGGRGHFEPARGDDCSNRDYCSKGGDIGKRNDLHDAVVKLKETRSLAAVASAFPETYVKY  
SRGLRELLLRRTWKTEVEVLCGPPGCGKSRYCMETYWKPRGKWWDDGYDGHQDVILDDFYGW  
LPFDDMLRLCDRYPLRVETKGGTMNFLARRIFITSNR L P H E W Y S D E A L Y R R L T L I K V W D  
>12\_Goose circovirus\_ABA39141  
YKRWFVFTINNP T F E D Y C A V V E F C N L D N C K F A I V G E E K G D P H L Q G F L S L R K N A K A A A L E V K  
LGGRAWLSRARGSD E D N E E Y C S K E S T Y G R S S D L S D A A S D V L A G L P I T D V A R K Y P T T Y V M F  
GRGLERLRQRDWKTEVIVLIGRPGSGKSRYAFEFYKSRGKWWDDGYNGQDVVVMDDFYGW  
LPYDDLRLICDRYPLRVEYKGGMTQFVSKTLIITSNREPRDWYKCEALYRRINQYLILT  
>13\_Duck circovirus\_AFJ74615  
YKRWFVFTINNP T F E D Y V H V L E F C T L D N C K F A I V G E E K G A P H L Q G F L N L R S N A R A A A L E E S  
LGGRAWLSRARGSD E D N E E Y C A K E S T Y G R S S D L A E A T S A V M A G V P L T E V A R K F P T T Y V I F  
GRGLERLRHRDWKTEVIVLIGPPGTGKSRYAFEFYKPRGKWWDDGYSGNDVVMDDFYGW  
LPYDDLRLITDRYPLRVEFKGGMTQFVAKTLIITSNREPRDWYKSEALYRRINKYLVYN  
>14\_Muscovy duck circovirus\_ACT79249  
YKRWFVFTINNP T F E D Y V H V L E F C T L D N C K F A I V G E E K G A P H L Q G F L N L R S N A R A A A L E E S  
LGGRAWLSRARGSD E D N E E Y C A K E S T Y G R S S D L A E A T S A V M A G V P L T E V A R K F P T T Y I I F  
GRGLERLRHRDWKTEVIVLIGPPGTGKSRYAFEFYKPRGKWWDDGYSGNDVVMDDFYGW  
LPYDDLRLITDRYPLRVEFKGGMTQFVAKTLIITSNREPRDWYKSEALYRRINKYLVYN



>15\_Duck\_circovirus\_ADX06802  
YKRWVFTINNPTFEDYVHVLEFCTLDNCKFAIVGEEKGAPHLQGFNLNRSNARAAALEES  
LGGRAWLSRARGSDDEDNEEYCAKESTYGRSSDLAEATSAVMAGVPLTEVARKFPPTYVIF  
GRGLERLRHRDWKTEVIVLIGPPGTGKSRYAFEFYKPRGKWWDGYSGNDVVVMDDFYGW  
LPYDDLRLRITDRYPLRVELKGGMTQFVAKTLIITSNREPRDWYKSEALYRRINKYLVYN

>16\_Muscovy\_duck\_circovirus\_ABO37838  
YKRWVFTINNPTFEDYVHVLEFCTLDNCKFAIVGEEKGAPHLQGFNLNRSNARAAALEES  
LGGRAWLSRARGSDDEDNEEYCAKESTYGRSSDLAEATSAVMAGVPLTEVARKFPPTYVIF  
GRGLERLRHRDWKTEVIVLIGPPGTGKSRYAFEFYKPRGKWWDGYSGNDVVVMDDFYGW  
LPYDDLRLRITDRYPLRVEFKGGMTQFVAKTLIITSNREPRDWYKSEALYRRINKYLVYN

>17\_Muscovy\_duck\_circovirus\_ACV69945  
YKRWVFTINNPTFEDYVHVLEFCTLDNCKFAIVGEEKGAPHLQGFNLNRSNARAAALEES  
LGGRAWLSRARGSDDEDNEEYCAKESTYGRSSDLAEATSAVMAGVPLTEVARKFPPTYVIF  
GRGLERLRHRDWKTEVIVLIGPPGTGKSRYAFEFYKPRGKWWDGYSGNDVVVMDDFYGW  
LPYDDLRLRITDRYPLRVEFKGGMTQFVAKTLIITSNREPRDWYKSEALYRRINKYLVYN

>18\_Mulard\_duck\_circovirus\_ADX07732  
YKRWVFTINNPTFEDYVHVLEFCTLDNCKFAIVGEEERGAPHLQGFNLNRSNARAAALEES  
LGGRAWLSRARGSDDEDNEEYCAKESTYGRSSDLAEATSAVMAGVPLTEVARKFPPTYVIF  
GRGLERLRHRDWKTEVIVLIGPPGTGKSRYAFEFYKPRGKWWDGYSGNDVVVMDDFYGW  
LPYDDLRLRITDRYPLRVEFKGGMTQFVAKTLIITSNREPRDWYKSEALYRRINKYLVYN

>19\_Mulard\_duck\_circovirus\_NP\_877978  
YKRWVFTLNNPTFEDYVHVLEFCTLDNCKFAIVGEEKGAPHLQGFNLNRSNARAAALEES  
LGGRAWLSRARGSDDEDNEEYCAKESTYGRSSDLAEATSAVMAGVPLTEVARKFPPTYVIF  
GRGLERLRHRDWKTEVIVLIGPPGTGKSRYAFEFYKPRGKWWDGYSGNDVVVMDDFYGW  
LPYDDLRLRITDRYPLRVEFKGGMTQFVAKTLIITSNREPRDWYKSEALYRRINKYLVYN

>20\_Duck\_circovirus\_ABY58003  
YKRWVFTINNPTFEDYVHVLEFCTLDNCKFAIVGEEKGAPHLQGFNLNRSNARAAALEES  
LGGRAWLSRARGSDDEDNEEYCAKESTYGRSSDLAEATSAVMAGVPLTEVARKFPPTYVIF  
GRGLERLRHRDWKTEVIVLIGPPGTGKSRYAFEFYKPRGKWWDGYSGNDVVVMDDFYGW  
VPYDDLRLRITDRYPLRVEFKGGMTQFVAKTLIITSNKEPRDWYRSEALYRRINKYLVYN

>21\_Duck\_circovirus\_ABY58009  
YKRWVFTINNPTFEDYVHVLEFCTLDNCKFAIVGEEKGAPHLQGFNLNRSNARAAALEES  
LGGRAWLSRARGSDDEDNEEYCAKESTYGRSSDLAEATSAVMAGVPLTEVARKFPPTYVIF  
GRGLERLRHRDWKTEVIVLIGPPGTGKSRYAFEFYKPRGKWWDGYSGNDVVVMDDFYGW  
VPYDDLRLRITDRYPLRVEFKGGMTQFVAKTLIITSNKEPRDWYRSEALYRRINKYLVYN

>22\_Duck\_circovirus\_ADX06804  
YKRWVFTINNPTFEDYVHVLEFCTLDNCKFAIVGEEKGAPHLQGFNLNRSNARAAALEES  
LGGRAWLSRARGSDDEDNEEYCAKESTYGRSSDLAEATSAVMAGVPLTEVARKFPPTYVIF  
GRGLERLRHRDWKTEVIVLIGPPGTGKSRYAFEFYKPRGKWWDGYSGNDVVVMDDFYGW  
LPYDDLRLRITDRYPLRVEFKGGMTQFVAKTLIITSNREPRDWYKSEALYRRINKYLVYN

>23\_Duck\_circovirus\_ACY25176  
YKRWVFTINNPTFEDYVHVLEFCTLDNCKFAIVGEEKGAPHLQGFNLNRSNARAAALEES  
LGGRAWLSRARGSDDEDNEEYCAKESTYGRSSDLAEATSAVMAGVPLTEVARKFPPTYVIF  
GRGLERLRHRDWKTEVIVLIGPPGTGKSRYAFEFYKPRGKWWDGYSGNDVVVMDDFYGW  
LPYDDLRLRITDRYPLRVEFKGGMTQFVAKTLIITSNREPRDWYKSEALYRRINKYLVYN

>24\_Duck\_circovirus\_ADX06810  
YKRWVFTINNPTFEDYVHVLEFCTLDNCKFAIVGEEKGAPHLQGFNLNRSNARAAALEES  
LGGRAWLSRARGSDDEDNEEYCAKESTYGRSSDLAEATSAVMAGVPLTEVARKFPPTYVIF  
GRGLERLRHRDWKTEVIVLIGPPGTGKSRYAFEFYKPRGMWWDGYSGNDVVVMDDFYGW  
LPYDDLRLRITDRYPLRVEFKGGMTQFVAKTLIITSNREPRDWYKSEALYRRINKYLVYN

>25\_Duck\_circovirus\_CAI82279  
YKRWVFTINNPTFEDYVHVLEFCTLDNCKFAIVGEEKGAPHLQGFNLNRSNARAAALEES  
LGGRAWLSRARGSDDEDNEEYCAKESTYGRSSDLAEATSAVMAGVPLTEVARKFPPTYVIF  
GRGLERLRHRDWKTEVIVLIGPPGTGKSRYAFEFYKPRGKWWDGYSGNDVVVMDDFYGW  
LPYDDLRLRITDPYPLRVEFKGGMTQFVAKTLIITSNREPRDWYKSEALYRRINKYLVYN

>26\_Duck\_circovirus\_ABY58005  
YKRWVFTINNPTFEDYVHVLEFCTLDNCKFAIVGEEKGAPHLQGFNLNRSNARAAALEES  
LGGRAWLSRARGSDENEEYCSKESTYGRSSQLADATSAVLAGLPLTDVARKYPTTYVIF  
GRGLERLRHRDWKTEVIVLIGPPGTGKSRYAFEFYKPRGKWWDGYSNDVVMDDFYGW  
LPYDDLRLRITDRYPLRVEFKGGMTQFVAKTLIITSNREPRDWYKSEALYRRINKYLVYN

>27\_Muscovy\_duck\_circovirus\_ACZ56128  
YKRWVFTINNPTFEDYVHVLEFCTLDNCKFAIVGEEKGAPHLQGFNLNRSNARAAALEES  
LGGRAWLSRARGSDENEEYCAKESTYGRSSDLAEATSAVMAGVPLTEVARKFPPTYVIF  
GRGLERLRHRDWKTEVIVLIGPPGTGKSRYAFEFYKPRGKWWDGYSNDVVMDDFYGW  
LPYDDLRLRITDRYPLRVEFKGGMTQFVAKTLIITSNREPRDWYKSEALYRRINKYLVYN

>28\_Duck\_circovirus\_ACB10224  
YKRWVFTINNPTFEDYVHVLEFCTLDNCKFAIVGEEKGAPHLQGFNLNRSNARAAALEES  
LGGRAWLSRARGSDENEEYCSKESTYGRSSQLADATSAVLAGLPLTDVARKYPTTYVIF  
GRGLERLRHRDWKTEVIVLIGPPGTGKSRYAFEFYKPRGKWWDGYSNDVVMDDFYGW  
LPYDDLRLRITDRYPLRVEFKGGMTQFVAKTLIITSNREPRDWYKSEALYRRINKYLVYN

>29\_Goose\_circovirus\_ABA39153  
YKRWVFTINNPTFEDYCAVVEFCNLDNCKFAIVGEEKGEPHLQGFSLRKNKAAALEEN  
LGGRAWLSRARGSDENEEYCSKESTYGRSSDLSDAASDVLGLPITDVARKYPTTYVMF  
GRGLERLRQRDWKTDVIVLIGRPGSGKSRYAFEFYKSRGKWWDGYNQDVMDDFYGW  
LPYDDLRLRITDRYPLRVEYKGGMTQFVAKTLIITSNREPRDWYKCEALYRRINQYLILT

>30\_Goose\_circovirus\_ABA39169  
YKRWVFTINNPTFEDYCAVVEFCNLDNCKFAIVGEEKGEPHLQGFSLRKNKAAALEEN  
LGGRAWLSRARGSDENEEYCSKESTYGRSSDLSDAASDVLGLPITDVARKYPTTYVMF  
GRGLERLRQRDWKTEVIVLIGRPGSGKSRYAFEFYKSRGKWWDGYNQDVMDDFYGW  
LPYDDLRLRITDRYPLRVEYKGGMTQFVAKTLIITSNREPRDWYKCEALYRRINQYLILP

>31\_Goose\_circovirus\_ABA39157  
YKRWVFTINNPTFEDYCAVVEFCNLDNCKFAIVGEEKGEPHLQGFSLRKNKAAALEEN  
LGGRAWLSRARGSDENEEYCSKESTYGRSSDLSDAASDVLGLPITDVARKYPTTYVMF  
GRGLERLRQRDWKTEVIVLIGRPGSGKSRYAFEFYKSRGKWWDGYNQDVMDDFYGW  
LPYDDLRLRITDRYPLRVEYKGGMTQFVAKTLIITSNREPRDWYKCEALYRRINQYLILT

>32\_Porcine\_circovirus\_1\_AGU01996  
HKRWVFTLNNPSEEEKNKIRELPIS-LFDYFVCGEEGLEPHLQGFANFASKQTFNKVKWY  
LGARCHIEKAKGTDQONKEYCSKEGHIGKRSDLSTAVSTLLETGSLVTVAEQFPVITYVRN  
FRGLAELLKRDWKTAVHVIVGPPGCGKSQWARNFYWKSRNKWWDGYPHGEVVVLDDFYGW  
LPWDDLRLRITDRYPLTVETKGGTVPFLARSILITSNQAPQEWYSSTALYRRITTLQFWK

>33\_Porcine\_circovirus\_1\_ABM67071  
HKRWVFTLNNPSEEEKNKIRELPIS-LFDYFVCGEEGLEPHLQGFANFAKKQTFNKVKWY  
FGARCHVEKAKGTDQONKEYCSKEGHIGKRSDLSTAVSTLLETGSLVTVAEQFPVITYVRN  
FRGLAELLKRDWKTAVHVIVGPPGCGKSQWARNFYWKSRNKWWDGYPHGEVVVLDDFYGW  
LPWDDLRLRITDRYPLTVETKGGTVPFLARSILITSNQAPQEWYSSTALYRRITTLQFWK

>34\_Porcine\_circovirus\_1\_AAW78479  
HKRWVFTLNNPSEEEKNKIRELPIS-LFDYFVCGEEGLEPHLQGFANFAKKQTFNKVKWY  
LGARCHIEKAKGTDQONKEYCSKEGHIGKRSDLSTAVSTLLETGSLVTVAEQFPVITYVRN  
FRGLAELLKRDWKTAVHVIVGPPGCGKSQWARNFYWKSRNKWWDGYPHGEVVVLDDFYGW  
LPWDDLRLRITDRYPLTVETKGGTVPFLARSILITSNQAPQEWYSSTALYRRITTLQFWK

>35\_Porcine\_circovirus\_1\_ABG37025  
HKRWVFTLNNPSEEEKNKIRELPIS-LFDYFVCGEEGLEPHLQGFANFAKKQTFNKVKWY  
LGARCHIEKAKGTDQONKEYCSKEGHIGKRSDLSTAVSTLLETGSLVTVAEQFPVITYVRN  
FRGLAELLKRDWKTAVHVIVGPPGCGKSQWARNFYWKSRNKWWDGYPHGEVVVLDDFYGW  
LPWDDLRLRITDRYPLTVETKGGTVPFLARSILITSNQAPQEWYSSTALYRRITTLQFWK

>36\_Porcine\_circovirus\_1\_AAT72755  
HKRWVFTLNNPSEEEKNKIRELPIS-LFDYFVCGEEGLEPHLQGFANFAKKQTFNKVKWY  
FGARCHIEKAKGTDQONKEYCSKEGHIGKRSDLSTAVSTLLETGSLVTVAEQFPVITYVRN  
FRGLAELLKRDWKTAVHVIVGPPGCGKSQWARNFYWKSRNKWWDGYPHGEVVVLDDFYGW  
LPWDDLRLRITDRYPLTVETKGGTVPFLARSILITSNQAPQEWYSSTALYRRITTLQFWK

>37\_Porcine\_circovirus\_2\_ADA79654  
HKRWVFTLNNPSEDERKKIRDLPIS-LFDYFIVGEEGNEPHLQGFANFVKKQTFNKVKWY  
LGARCHIEKAKGTDQONKEYCSKEGNLQQRSDLSTAVSTLLESGSLVTVAEQHPVTFVRN  
FRGLAELLKRDWKTNVHVIVGPPGCGKSKWAANFYWKPRNKWWDGYHGEEVVVIDDFYGW  
LPWDDLLRLCDRYPLTVETKGGTVPFLARSILITSNQTPLEWYSSTALYRRITSLVFWK  
>38\_Porcine\_circovirus\_2\_ADU77003  
HKRWVFTLNNPSEDERKKIRDLPIS-LFDYFIVGEEGNEPHLQGFANFVKKQTFNKVKWY  
LGARCHIEKAKGTDQONKEYCSKEGILQQRSDLSTAVSTLLESGSLVTVAEQYPVTFVRN  
FRGLAELLKRDWKTNVHVIVGPPGCGKSKWAANFYWKPRNKWWDGYHGEEVVVIDDFYGW  
LPWDDLLRLCDRYPLTVETKGGTVSFLARSILITSNQTPLEWYSSTALYRRITSLVFWK  
>39\_Porcine\_circovirus\_2\_ABY56254  
HKRWVFTLNNPSEDERKKIRDLPIS-LFNYFIVGEEGNEPHLQGFANFVKKQTFNKVKWY  
LGARCHIEKAKGTDQONKEYCSKEGNLQQRSDLSTAVSTLLESGSLVTVAEQYPVTFVRN  
FRGLAELLKRDWKTNVHVIVGPPGCGKSKWAANFYWKPRNKWWDGYHGEEVVVIDDFYGW  
LPWDDLLRLCDRYPLTVETKGGTVPFLARSILITSNQTPLEWYSSTALYRRITSLVFWK  
>40\_Porcine\_circovirus\_2\_ADG07990  
HKRWVFTLNNPSEDERKKIRDLPIS-LFDYFIVGEEGNEPHLQGFANFVKKQTFNKVKWY  
LGARCHIEKAKGTDQONKEYCSKEGNLQQRSDLSTAVSTLLESGSLVTVAEQHPVTFVRN  
FRGLAELLKRDWKTNVHVIVGPPGCGKSKWAANFYWKPRNKWWDGYHGEEVVVIDDFYGW  
LPWDDLLRLCDRYPLTVETKGGTVPFLARSILITSNQTPLEWYSSTALYRRITSLVFWK  
>41\_Porcine\_circovirus\_2\_CBK52350  
HKRWVFTLNNPSEDERKKIRDLPIS-LFDYFIVGEEGNEPHLQGFANFVKKQTFNKVKWY  
LGARCHIEKAKGTDQONKEYCSKEGNLQQRSDLSTAVSTLLESGSLVTVAEQYPVTFVRN  
FRGLAELLKRDWKTNVHVIVGPPGCGKSKWAANFYWKPRNKWWDGYHGEEVVVIDDFYGW  
LPWDDLLRLCDRYPLTVETKGGTVPFLARSILITSNQTPLEWYSSTALYRRITSLVFWK  
>42\_Opossum\_AAFR03007912\_Endogenous  
-----KRWCFTIKNKEYLKGISP-N-YFHYLIVGEEKQPHLQGYCNLKKQVRLPGVKKL  
ISQRGHFEMARVSDENLRYFSEEDNIGKRTDLSRVVDHLLHKSLSQSVAKAFPEQFVKY  
FCGFGALILREWKTEVIVVWVGGPPIGKSCLCHECYWKAHGKWWDG-----W  
LPFDDLLHICDRYPLCVETKGGTQNFLAKTLCITSNKLPODWYREDALYGRIPQHFWT  
>43\_Dog\_AOCS01198411\_Endogenous  
-----FTVNNLTDKGASCVECGQT--CCKYFRVSTEVGELRLLGHFH----KRLSALKVS  
GFLRARFEPAHGTDEDRYRYCSKDG--GKRTD-----  
-----FKISVPVRIGSWGEGQSRFFAEKVCIL-VNGGGGYRGOQALVIDDSNGW  
IPYGEMLGLLDYRPHNVPINGAFVKFNSRCIFIASISPPCTWYSNEIVYICILKM----  
>44\_Cat\_AANG02107753\_Endogenous  
---WCFTISNFTTE-----EKSEPCCLKGSANLNRRDLSLSALKKV  
PGHRAHFEPARTRD-DNKKNCCKDGVLG----VHCGVTSREWWWTCSVWLMRYRPFPMKY  
GRGFCDFVLDVGSKS-CL-----GQVPFCCWEVWVWLASGK-WGGYRGOQAVVTHDLNGC  
IPYGEMLDFMDRYPHKV-----  
>45\_Cat\_AANG02135671\_Endogenous  
-----AL-AM  
VKNLAHFEPVRRRDEDNKKYCSSEGGH-PKRMD-QESAVELPQEKALKHLAKEMSVLFIKY  
GSGLCDVFLQDLKTYVSFTVGLGCSVAEKCASSYKPRGEGWD-WAG-----DDF-GC  
ILNDEMLHIRDRYP-----A  
lignmentofhepadnaviralsequences:  
>46\_Crotalus\_mitchellii\_eSCV5  
-----  
-----  
-----KMRDFKTEVHVIMGIPRCGKSKFCNELYWKPRGKWWDGYTGOEIVILDDYYGW  
LPFDELLRLCDRYPYRVETKGGTVEFVSKTIYITSNKP-----A  
lignmentofhepadnavirussequences:  
>1\_Crotalus\_mitchellii\_contig\_93260\_Endogenous  
-----PNYKSLSRILPPIMSRLSD  
FSEAFNHLPHHPESA AHFAYGFRKCPN-----TIADHIHCRLFCFAYMDDF

ISSHPNRKYLAASHSCIOCLQTYRIRINYD-IMPEPVQDIHYIGGIPKEHQEKINILK  
EIDCKKWYDWKTI AHFIGHLSFLAGFSSQWSFLITLYAICNK-SDVQFSKWKQLLLKT  
VKTLI-----FKQSRPIHQOEL-FLLFIIN---FVLYFVIVCL  
LCTNALIIYHGCFCYVLCVTHWKQNL CYMASEDN PAD  
>2\_Crotalus mitchellii\_contig\_192207\_Endogenous  
TGKCFVLNKNKSDSSKRLVDFSQFSRGS AKLHFPKYWSPNHL SLARMLPNDMWRISLD  
MSEAFYHIPMHPHSS THLVYGRK SAMVGLSPFLLTMLNLLATNIRWTIFCFAYMDDF  
ILCHPNYNYIHAASSAICNHLQNLGIVINKDKMTLTPAKEIKYLGRPPQSYRKELIKLLN  
DININHWYDWKCIQRFIGKLGFLVLTFTVYGYAILQPLYTAMSEHCDVRF TLYYKNVLIKV  
VKSISITLRTKEKYPINFAVDACLEFRNDYPIHVKELLITLYVIVNFQPKAIETDSMY  
VLHKHFNTLPFGLMMFAYDTMRHVRMYFVRSQDNIAD  
>3\_Cobra\_Endogenous  
-----NPNYKCLSRIPLNRSRISLE  
FSEAFYHLLHHPGVC-HLVYRFRKCPMEIGLSPFNLTFTNAIVDHIYHKISCFTYLDDF  
IHSHPNPKYLAATSHGSIQGLQTYGT LINYDKSTPEPIQDIHYIGIGI-EYQEKCTNILK  
EIDSKKRYDWKIMQCLVGLNFLDGF SFFQWSFLIPLY-AIWNRSDIQFSK-YKQLLLKI  
IKT-----FKQSRPIHQOELLGFFALLFILNLMLYFLIVCL  
LCTNTLIIYHGSFPCYVPCTCI-NKTYVASEDNSAD  
>4\_Melopsittacus undulatus\_JQ978780\_Endogenous  
TGWVFLVDKNS-DTEKARLVADFSQFSRGTNKVSFPKYWCPNLTTLRRIPLGMPRISLD  
VSQAFYHLPLNPASGSRVLYYFRKAAMGVGISPFFLHLFSTALAAEISSRIWAFAYMDDF  
LLCHPNSCYLN TVSHSVCRFLEELGVTINVDKSTPSPTRDINFLGQIPETMWDKLRVIE  
KIKIGEQYDFKIVQRFVGHNLNWL PFTTRGCVELLSSMYQAITAKQNF SFSKTYKYVLYKV  
TMGVCRLVLDPHAPRPLPRVATDATLTFSKQYPIHIQESLVVLLCRLMLHPICILT DSTF  
VLHKRFGSLPWRFAILCEQCLKGTPLYFVPSKYNPAD  
>5\_Melopsittacus undulatus\_JQ978777\_Endogenous  
TGWVFLVDKNS-DTEKARLVADFSQFSRGTNKVSFPKYWCPNLTTLRRIPLGMPRISLD  
VSQAFYHLPLNPASGSRVLYYFRKAAMGVGISPFFLHLFSTALAAEISSRIWAFAYMDDF  
LLCHPNSCYLN TVSHSVCRFLEELGVTINVDKSTPSPTRDINFLGQIPETMWDKLRVIE  
KIKIGEQYDFKIVQRFVGHNLNWL PFTTRGCVELLSSMYQAITAKQNF SFSKTYKYVLYKV  
TMGVCRLVLDPHAPRPLPRVATDATLTFSKQYPIHIQESLVVLLCRLMLHPICILT DSTF  
VLHKRFGSLPWRFAILCEQCLKGTPLYFVPSKYNPAD  
>6\_Taeniopygia guttata\_j\_ABQF01007435\_Endogenous  
-----LGQILLMDMPIMSLD  
VS-AFYHLPLNPVSAMQLVYYFLKNPVILVSVSFLPLFSS-LILNGCQSI-TLANK--F  
LLCYTASCYLNLSHS-CCFLESIGIIINFDKCTSSPVEELKFPGTISDEKLIASEQV DK  
QIDCSDFCYFKILQRLICQVTFGIPFTTYSKCV-QALYASII SKKKFIFCCKTLLHKMY  
YQGV-EWKLEPKTSVSPKLATDAMLKFCRTRPIDIQEFLTASVAVSLIKPQSLICDSTF  
VCRKYLRFLPWRFALWARQTL SQVKVYWTPAKFNSAD  
>7\_Taeniopygia guttata\_i\_ABQF01038718\_Endogenous  
TGWFLVDKNSRNIKEARLVVVF SHFSQGNLSFPKYWAPNLCALSRIPLLEMFVWVSLD  
VSQVFYHLPMTSPATRLTYSFRKAPMRVGLSPFLLHLFSTALTAKISHWIWAFAYMD-F  
LLSHPRHCYLATASHAVCSFLOQLGIRIN YDKATPSPVCEILFLGQIPDEQWTKTRQKIK  
KISTTKEYDWKILQRLVGHNLNFLIPFTTRFSICVLQPMYRAITVKCNFVFSKTYCAVLLKM  
LDHRYKWKINLKPSIPIQLATDATP DFSKERHIHQE LLMVLCARLMIRPRSLLCDNHF  
VCHKKFGTLPWLFALYANILLKKTLLHFVPSKYNPAD  
>15\_Parrot hepatitis B virus\_J-274029  
TGRIFLVDKNSRNTTEARLVDFSQFSKQNALRFPKYWSPNLSTLRRILPVGMRISLD  
LSQAFYHIPLNPASGSRVLYYFRKTPMGVGISPFFLHLFSA AIGSEISRRIWTF TYMDDF  
LLCHPNARHLNAVSHAVCTFLQEFGIRINFDKMTSPVTTIRFLGQIEDSRWTELRTVIK  
KISVKGWYDWKCIQRLIGHIQFVLPFTKGNSEMLKPMYLAVKEQVNF SFSRYRNLLYKL  
TMGVCRLTLNPKVSLPLPRVATDATLTFSKVRDIHQE LLMSC LAMLMIKPRCLLS DSTF  
VCHKRYMTLPWNFAVLSKQLLGKVP IYYVPSKYNPAD  
>16\_Parrot hepatitis B virus\_J-274023  
TGRIFLVDKNSRNTTEARLVDFSQFSKQNALRFPKYWSPNLSTLRRIVPVGMRISLD

LSQAFYHIPLNPASGSRLVYYFRKTPMGVGISPFFLHLFSAAGSEISRRIWTFYMDDF  
LLCHPNARHLNAVSHAVCTFLQEFGIRINFDKMTSPVTTIRFLGQIEDTRWTELNRVIK  
KISVGKWDWKCIQRLIGHIQFVLPFTKGNSEMLKPMYLAVKEQVNFSSRYRNLLYKL  
TMGVCRLTLNPKVSLPLPRVATDATLTFKVRDIHVQELLMSCSLAMLMIKPRCLLSDSTF  
VCHKRYMTLPWNFAVLSKQLLSKVPIYYVPSKYNPAD

>17\_Parrot hepatitis B virus\_J-274030

TGRIFLVDKNSRNTEEARLVVDFSQFSKGNALRFPKYWSPNLSTLRRILPVGMRISLD  
LSQAFYHIPLNPASGSRLVYYFRKTPMGVGISPFFLHLFSAAGSEIARRIWTFYMDDF  
LLCHPNARHLNAVSHAVCTFLQEFGIRINFDKMTSPVTTIRFLGQIEDARWTELRTVIK  
KISVGKWDWKCIQRLIGHIQFVLPFTKGNSEMLKPMYLAVKEQVNFSSRYKNLLYKL  
TMGVCRLTLNPKVSLPLPRVATDATLTFKVRDIHIQELLMSCSLAMLMIKPRCLLSDSTF  
VCHKRYMTLPWNFAVLSKQLLGKVPPIYYVPSKYNPAD

>18\_Ross' goose hepatitis B virus\_AY494849

TGRIFLVDKNSRNTEEARLVVDFSQFSKGNAMRFPKYWSPNLSTLRRILPMGMPRISLD  
LSQAFYHPLNPASSRSLVYYFRKAPMGVGLSPFLLHLFTTALGSEISRRVWTFYMDDF  
LLCHPNARHLNAISHAVCSFLQELGVRINFDKTPSPVTEIKFLGKIEDQRWNELRQVIK  
KIQVGKWDWKCIQRFIGHLNFILPFTKGNVEMLKPMYHAVTHRNVNFSSSYRTLLYKL  
TMGVCKLRLNPKVSLPLPRVATDATLTFKVRDIHIQELLMACSLAKLMIKPRCLLTDSTF  
VIHKRYQTLPWHFVAVLAKQLMQNIQLYFVPSKYNPAD

>19\_Snow goose hepatitis B virus\_AF110996

TGKFLVDKNSRNTEEARLVVDFSQFSKGNAMRFPKYWSPNLSTLRRILPVGMPRISLD  
LSQAFYHPLNPASSRSLVYYFRKAPMGVGLSPFLLHLFTTALGSEISRRVWTFYMDDF  
LLCHPNARHLNSISHAVCTFLQELGIRINFDKTPSPVNEIRFLGRIEESRWKELRTVIK  
KIKPGEWYDWKCIQRFVGHNLNFVLPFTKGNIEMLKPMYAAITNKVNFSSAYRTLLYKL  
TMGVCKLQINPKSSVPLPRVATDATPTFSKVRDIHIQELLMVCLAGIMIKPRCILSDSTF  
VCHKRYQTLPWHFAMYAKQLLSPIQLYFVPSKYNPAD

>20\_Heron hepatitis B virus\_M22056

TGRIFLVDKNSRNTEEARLVVDFSQFSKGNAMRFPKYWCPNLSTLRRILPVGMPRISLD  
LSQAFYHPLAPASSRSLVYYFRKAPMGVGLSPFLLHLFTTAIGAEIASRVWTFYMDDF  
LLCHPSARHLNTISHAVCTFLQEFGIRINFDKMTSPVTTIRFLGKIEESRWNELRRTVIK  
KIKVGQWYDWKCIQRFIGHLNFVLPFTKGNIEMLKPMYDACTHRVNFVAFSSRYKILLYKL  
TMGVCKLTLDPKVSPLPRVATDATLTFKVRDIHIQELLMVCLAKLMIKPRCILTDSTY  
VCHRKFSKLPWHFAMYAKQLLTRLTLYYVPSKYNPAD

>21\_Snow goose hepatitis B virus\_AF110998

TGKFLVDKNSRNTEEARLVVDFSQFSKGNAMRFPKYWSPNLSTLRRILPVGMPRISLD  
LSQAFYHPLNPASSRSLVYYFRKAPMGVGLSPFLLHLFTTALGSEISRRVWTFYMDDF  
LLCHPNARHLNSISHAVCTFLQELGIRINFDKTPSPVNEIRFLGKIEESRWKELRTVIK  
KIKPGEWYDWKCIQRFVGHNLNFVLPFTKGNIEMLKPMYAAITNKVNFSSAYRTLLYKL  
TMGVCKLQINPKSSVPLPRVATDRTPFSKVRDIHIQELLMVCLARIMIKPRCILSDSTF  
VCHKRYQTLPWHFAMYAKQLLSPIQLYFVPSKYNPAD

>22\_Parrot hepatitis B virus\_J-274019

TGRVFLVDKNSRNTEEARLVVDFSQFSKGNALRFPKYWSPNLSTLRRIVPVGMYRISLD  
MSQAFYHIPINPASGSRLVYYFRKAPMGVGLSPFLLHLFTTAIGSEIARRIWTFYMDDF  
LLCHSNPRYLNNAVSHAVCTFLQEYGIRINFDKTPQPVKTIRFLGKIEESRWMDLRQIIK  
KIVVGKWDWKCIQRFIGHLQFVLPFTKGNSEMLKPLYAAVTNQVNFVAFSSRFKILLYKL  
TMGVSKLKLNPVTLPLPRVATDATLTFKVRDIHIQELLMSCSLAMLMIKPRCLLSDSTF  
VCHKRYMTLPWHFAMFAKQLLTKVPVYFVPSKYNPAD

>23\_Duck hepatitis B virus\_DQ276978

TGKFLVDKNSRNTEEARLVVDFSQFSKGNAMRFPKYWSPNLSALRRILPLGMPRISLD  
LSQAFYHPLNPASSRSLVYYFRKAPMGVGLSPFLLHLFTTALGSEIARRVWTFYMDDF  
LLCHPNARHLNSISHAVCSFLQELGIRINFDKTPSPVNEIRFLGKIEESRWSELRTVIK  
KIKVGEWYDWKCIQRFVGHNLNFVLPFTKGNVEMLKPMYAAITHKVNFSSAYRTLLYKL  
TMGVCKLSIKPKSSVPLPRVATDATPTFSKVRDIHIQELLMVCLARIMIKPRCILSDSTF  
VCHKRYQALPWHFVAVLAKQLLSPIPLYFVPSKYNPAD

>24\_Crane hepatitis B virus\_AJ441113

TGRLFLVDKNSRNTEEARLVVDFSQFSKGNAMHFPRYWSPNLSTLRRILPVGMPRISLD  
LSQAFYHLPLNPASSSRLVYYFRKAPMGVGLSPFLLHLFTTALGTEISRRVWTFYMDDF  
LLCHPNARHLNAISHAVCTFLOELGIRINFDKMTPSPVNEIRFLGKIEESRWIELRQVIK  
KIQIGQWYDWKCIQRFVGHNLNFVLPFTKGNIEFMFKPMYAAITNQVNFSSAYRTLLYKL  
TMGVCKLRLKPKASVPLPRVATDATPTFSKVRDIHVQELLMTCLAKLMIKPRCLLSDSTF  
VCHKRYQTLPWHPAMFAKQLLKNIQLYFVPSKYNPAD

>25\_Ross' goose hepatitis B virus\_AY494849

TGRIFLVDKNSRNTEEARLVVDFSQFSKGNAMRFPKYWSPNLSTLRRILPMGMPRISLD  
LSQAFYHLPLNPASSSRLVYYFRKAPMGVGLSPFLLHLFTTALGSEISRRVWTFYMDDF  
LLCHPNARHLNAISHAVCSFLQELGVRINFDKTTPSPVTEIKFLGKIEDQRWNELRQVIK  
KIQVGKQWYDWKCIQRFVGHNLNFILPFTKGNVEMLKPMYHAVTHRNVNFSFSSSYRTLLYKL  
TMGVCKLRLNPKVSLPLPRVATDATLTFKVRDIHIQELLMACLAKLMIKPRCLLTDSTF  
VIHKRYQTLPWHPAVLAKQLMQNIQLYFVPSKYNPAD

>26\_Heron hepatitis B virus\_M22056

TGRIFLVDKNSRNTEEARLVVDFSQFSKGNAMRFPKYWCPNLTTLRRILPVGMPRISLD  
LSQAFYHLPLAPASSSRLVYYFRKAPMGVGLSPFLLHLFTTAIGAEIASRVWTFYMDDF  
LLCHPSARHLNTISHAVCTFLOEFGIRINFDKMTPSPVTTIRFLGKIEESRWNELRVVIK  
KIKVGQWYDWKCIQRFVGHNLNFVLPFTKGNIEMLKPMYDACTHRVNFASFSSRYKILLYKL  
TMGVCKLTLDPKVSPLPRVATDATLTFKVRDIHIQELLMVCLAKLMIKPRCILT DSTY  
VCHRKFSKLPWHPFAMYAKQLLTRLTLTYVPSKYNPAD

>27\_Snow goose hepatitis B virus\_AF111000

TGKFLVDKNSRNTEEARLVVDFSQFSKGNAMRFPKYWSPNLTTLRRILPVGMPRISLD  
LSQAFYHLPLNPASSSRLVYYFRKAPMGVGLSPFLLHLFTTALGSEISRRVWTFYMDDF  
LLCHPNARHLNSISHAVCTFLOELGIRINFDKTTPSPVNEIRFLGKIEESRWKELRTVIK  
KIKPGEWYDWKCIQRFVGHNLNFVLPFTKGNIEMLKPMYAAITNKVNFSSAYRTLLYKL  
TMGVCKLQINPKSSVPLPRVATDATPTFSKVRDIHIQELLMVCLARIMIKPRCILSDSTF  
VCHKRYQTLPWHPFAMYAKQLLSPIQLHFVPSKYNPAD

>28\_Stork hepatitis B virus\_AJ251937

TGRIFLVDKNSRNTEEARLVVDFSQFSKGNAMRFPKYWSPNLTALRRIVPLGMPRISLD  
LSQAFYHLPLNPASSSRLVYYFRKAPMGVGLSPFLLHLFTTAIGAEISRRVWTFYMDDF  
LLCHPSARHLNSISHAVCTFLOEFGIRINFDKMTPSPVTTIRFLGKIEESRWNELRQVIK  
KIKVGQWYDWKCIQRLIGHNLNFVLPFTKGNVEMLKPMYDACTHRVNFASFSSRYKILLYKL  
TMGVCKLTLKPKSSLPLPRVATDATLTFKVRDIHVQELLMVCLARLMIKPRCILT DSTY  
VCHRFKNKLPWHPFAMYAKQLLTRLTLTYVPSKYNPAD

>29\_Duck hepatitis B virus\_AY494851

TGKFLVDKNSRNTEEARLVVDFSQFSKGNAMRFPKYWSPNLTTLRRILPVGMPRISLD  
LSQAFYHLPLNPASSSRLVYYFRKAPMGVGLSPFLLHLFTTALGSEISRRVWTFYMDDF  
LLCHPNARHLNAISHVCSFLQELGVRINFDKTTPSPVNEIRFLGKIEESRWKELRTVIK  
KIKIGEWYDWKCIQRFVGHNLNFVLPFTKGNIEMLKPMYAAITNQVNFSSAYRTLLYKL  
TMGVCKLQIKPKSSVPLPRVATDATPTFSKVRDIHVQELLMTCLAKIMIKPRCLLSDSTF  
VCHKRYQTLPWHPAMFAKQLLKIPLYFVPSKYNPAD

>30\_Woolly monkey hepatitis B virus\_AY226578

TGGVFLVDKNPHNATESRLVVDFSQFSRGNTSVSWPKFAVNLQSLTNLLSTDLSWVSLD  
VSAAFYHLPLHPASMPHLIMGFRKVPMLGLSPFLLAQFTSAICS-VVRRCMFAFSYMDDV  
VLGAKSVQHLESLLASVTTFLALGIHLNPEKTKRWG-RALNFMGLPQQHIRDKIALCFQ  
KLPCNRPIDWKVCQRIVGLLGFVAPFTQCGYAALMPIYTCIQKHQAFTFSLVYKTFKLDQ  
YMHLYPVARQRAGHCQVFA---DATPTFLSPLPIHTAELLAACFARCWSGAKLIGTDNAV  
VLSRKYTHFPWLLGCAATWILRGTCFVYVPSKLN PAD

>31\_Arctic ground squirrel hepatitis B virus\_AGU29144

TGGVFLVDKHPHNSSESRLVVDFSQFSRGHTRVHWPKFVAVLNLQALANLLSTNLQWLSLD  
VSAAFYHIPVSPAAPVPHLIMGFRKLPMPGVGLSPFLLAQFTSALAS-MVRRCVAFAYMDDL  
VLGARTHEHLTAIYSHICSVFLDLGIHLNVAKTKWWG-HHLHFMGLPQDKHVQKVSTYLK  
SIPLNKPLDYKICERLTGILNYVAPFTKCGYAALLPLYQATS-RTAFVFSVLYHSWLLSL  
YaelwPVARQRGVVCSVS----DATPTGAFALPIATADVIAACLARCWTGARLLGTDNSV  
VLSGKLTSPWLLACVANWILRGTSFCYVPSAANPAD

>32\_Hepatitis B virus isolate\_AY330912  
TGGVFLVDKNPHNTAESRLVVDFSQFSRGS TRVPWPKF AVPNLQSLTNLLSTNLSWLSLD  
VSAAFYHLP LHPAAMPHLILGFRKIPMGVGLSPFLLAQFTSAICS-VVRRCLAFSYMDDV  
VLGAKSVQHLES LYTAVTNFLLSLGIHLNPNKTKRWG-YSLHFMGLPQNHIVQKIKQCFR  
KLPVNRPIDWKVCQRIVGLLGFAAPFTQCGYPALMPLYACIQAKQAF TFSPTYKAFLSQ  
YSTLYPVARQRFGLCQVFA---DATPTFVAPLPIHTAELLAACFARSRSGANIIGTDNSV  
VLSRKYTSFPWLLGCAANWILRGTSFVYVPSALNPAD

>33\_Hepatitis B virus\_AJ131574  
TGGVFLVDKNPHNSTESRLVVDFSQFSRGS TRVSWPKF AVPNLQSLTNLLSSNLSWLSLD  
VSAAFYHLP LHPAAMPHLVLGFRKIPMGVGLSPFLLAQFTSAICS-VVRKCLAFNYMDDV  
VLGAKSVQHLES LYTAVTNFLLSLGIHLNPTKTKRWG-YSLNFMGLPQEHIVYKIKQCFK  
KLPVNRPIDWKVCQRIVGLLGFAAPFTQCGYPALMPLYACIQAKQAF TFSPTYKAFLRQ  
YLTLYPVARQRPGLCQVFA---DATPTFVAPLPIHTAELLAACFARSRSGANLIGTDNSV  
VLSRKYTSFPWLLGCAANWILRGTSFVYVPSALNPAD

>34\_Hepatitis B virus\_AJ131567  
TGGVFLVDKNPHNTAESRLVVDFSQFSRGS TRVPWPKF AVPNLQSLTNLLSSNLSWLSLD  
VSAAFYHLP LHPAAMPHLVLGFRKIPMGVGLSPFLLAQFTSAICS-VVRRCLAFSYMDDV  
VLGAKSVQHLES LYTAVTNFLLSLGIHLNPTKTKRWG-YSLNFMGLPQEHIVQKIKHCFR  
KIPVNRPIDWKVCQRIVGLLGFAAPFTQCGYPALMPLYACIQAKQAF TFSPIYKAFLSKQ  
YATLYPVARQRAGLCQVFA---DATPTFVAPLPIHTAELLAACFARSRSGANIIGTDNSV  
VLSRKYTSFPWLLGCAANWILRGTSFVYVPSALNPAD

>35\_Ground squirrel hepatitis virus\_NC\_001484  
TGGIFLVDKNPNYNSESRLVVDFSQFSRGS RVHWPKF AVPNLQTLANLLSTNLQWLSLD  
VSAAFYHIPVSPA AVPHFIMGFRKIPMGVGLSPFLLAQFTSALTS-MVRRCLAFAYMDDL  
VLGARSYEH LTA VYSHICSVFLDLGIHLNVEKTKWWG-HTLHFMGLPQDKHVHKVT TYLK  
SIPINQPLDYKICERLTGILNYVAPFTKCGYAALLPLYQAIASHTAFV FSSLYKNWLLSL  
YGELWPVARQRGVVCSVFA---DATPTFGFSLPIATAELIAACLARCWTGARLLGTDNSV  
VLSGKLTSPWLLACVANWILRGTSFCYVPSADNPAD

>36\_Hepatitis B virus\_FJ787490  
TGGVFLVDKNPHNTTESRLVVDFSQFSRGS TRVSWPKF AVPNLQSLTNLLSSNLSWLSLD  
VSAAFYHIP LHPAAMPHLILGFRKIPMGVGLSPFLMAQFTSAICS-VVRRCLVFSYIDDV  
VLGAKSVQHLES LFTAITNFLLSLGIHLNPHRTRRWG-YSLNFMGLPQEHIVQKIKQCFR  
KLPINRPID-KVCQRIVGLLGFAAPFTQCGYPALMPLYTCIQSKQAF TFSPTYKAFLCKQ  
YLNLYPVARQRSGLCQVFA---DATPTFVAPLPIHTAELLAACFARSRSGAKLIGTDNSV  
VLSQKYTSFP-LLGCAANWILRGTSFVYVPSALNPAD

>37\_Orangutan hepatitis B virus\_AF193864  
TGGVFLVDKNPHNSSESRLVVDFSQFSRGS TSVSWPKF AVPNLQSLTNLLSSNLSWLSLD  
VSAAFYHIP LHPADMPHLIMGFRKIPMGVGLSPFLLAQFTSAICS-VVRRCLAFSYMDDM  
VLGAKSVQHLES LYTAVTNFLLSLGIHLNPSKTKRWG-YSLHFMGLPQDHIVQKIKHCFR  
KLPVNRPIDWKVCQRIVGLLGFAAPFTQCGYPALMPLYNCIQNRQAF TFSPTYKAFLRTO  
YLTLYPVARQRPGMCQVFA---DATPTFVAPLPIHTAELLAACFARSRSGANIIGTDNSV  
VLSRKYTSFPWLLGCAANWILRGTSFVYVPSALNPAD

>38\_Woodchuck hepatitis B virus\_AY628098  
TGGVFLVDKNPNNSSESRLVVDFSQFSRGS TRVHWPKF AVPNLQTLANLLSTDLOWLSLD  
VSAAFYHIP I SPA AVPHLIMGFRKIPMGVGLSPFLLAQFTSALAS-MVRRCVVFAYMDDL  
VLGARTSEHLTAIYTHICSVFLDLGIHLNVNKTWWG-NHLHFMGLPQDKHVKKLSRYLR  
SVPVNQPLDYKICERLTGILNYVAPFTLCGYAALMPLYHAIASRTAFV FSSLYKSWLLSL  
YEELWPVVRQRGVVCSVFA---DATPTFAFPLPIATAELIAACLARCWTGARLLGTDNSV  
VLSGKLTSPWLLACVANWILRGTSFCYVPSALNPAD

>39\_Bat hepatitis virus\_472438220  
TGGVFLVDKNPGNRQESRLVVDFSQFSRGS DTRVHWPKF AVPNLQSLTNLLSTNMHWLSLD  
VAAAFYHIP LSSAAMCHLIMGFRKIPMGVGLSPFLLAQFTSALAS-LVRRCMAF TYMDDV  
VLGAKSPHHLRALHTSVCSLFRDLGIVVNP TKTKWWG-KHLHFMGLPQDKHHQKALKLIS  
SLPVNKPLDWKILQRITGLLGFLAPFTTCGYPALMPLYHAITRRQALKI SWPFKNFLYSL  
YKQPLPVIRQKPAICQVFA---DATPTFPRPLPIHCAELIAACLARRWTGARVIGTDNSI

VASGKRTSFPWLLGCVANWMLRGTSFCFVPSALNPAD  
>40\_Bat\_hepatitis\_virus\_460417887  
TGGVFLVDKNPGRQESRLVVDFSQFSRQDTRVHWPKFVAVPNLQSLTNLLSTNMHWLSLD  
VAAAFYHIPLSSAAMCHLIMGFRKIPMGVGLSPFLLAQFTSALAS-LVRRCMFTYMDDV  
VLGAKSPHLLRALHTSVCSLFRDLGIVVNPTKTKWWG-KHLHFMGLPQDKHHQKALKLIS  
SLPVNKPLDWKILQRITGLLGFLAPFTTCGYPALMPLYHAITRRQALKISWPFKNFLYSL  
YKQPLPVIRQKPAICQVFA---DATPTFFRPLPIHCAELIAACLARRWTGARVIGTDNSI  
VASGKRTSFPWLLGCVANWMLRGTSFCFVPSALNPAD  
>8\_Crane\_hepatitis\_AJ441112  
TGRLFLVDKNSRNTTEEARLVVDFSQFSKGKNAMEHFPYRWSPNLSTLRRILPAGMPRISLD  
LSQAFYHLPLNPASSRSLVYYFRKAPMGVGLSPFLHLFTTALGTEISRRTVFTYMDDF  
LLCHPNARHLNAISHAVCTFLQELGIRINFDMTPSPVNEIRFLGKIEESRWIELRQVIK  
KIQIGQWYDWKCIQRFVGHNLNVLFPFTKGNIEFMKPMYAAITNQVNFSSAYRTLLYKL  
TMGVCKLRLKPKASVPLPRVATDATPTFSKVRDIHVQELLMTCLAKLMIKPRCLLSDSTF  
VCHKRYQTLPWHFAMFAKQLLKNIQLYFVPSKYNPAD  
>9\_Duck\_hepatitis\_B\_virus\_-58569  
TGKFLVDKNSRNTSEARLVVDFSQFSKGKNAMEHFPYRWSPNLSTLRRILPVGMPRISLD  
LSQAFYHLPLNPASSRSLVYYFRKAPMGVGLSPFLHLFTTALGSEIARRVWFTYMDDF  
LLCHPNARHLNSISHAVCSFLQELGIRINFDMTPSPVNEIRFLGKIEESRWKELRTVIK  
KIKIGEWYDWKCIQRFVGHNLNVLFPFTKGNIEMLKPMYAAITHKVNFSFSSAYRTLLYKL  
TMGVCKLSIKPKSSVPLPRVATDATPTFSKVRDIHQELLMVCLAKLMIKPRCILTSTF  
VCHKRYQTLPWNFVAVFAKQLLSSIPLYFVPSKYNPAD  
>10\_Duck\_hepatitis\_virus\_B\_-12798  
TGKFLVDKNSRNTTEEARLVVDFSQFSKGKNAMEHFPYRWSPNLSTLRRILPVGMPRISLD  
LSQAFYHLPLNPASSRSLVYYFRKAPMGVGLSPFLHLFTTALGSEIARRVWFTYMDDF  
LLCHPNARHLNAISHAVCSFLQELGIRINFDMTPSPVNEIRFLGKIEESRWKELRTVIK  
KIKVGEWYDWKCIQRFVGHNLNVLFPFTKGNIEMLKPMYAAITNQVNFSSSYRTLLYKL  
TMGVCKLRIKPKSSVPLPRVATDATPTFSKVRDIHVQELLMVCLAKLMIKPRCLLSDSTF  
VCHKRYQTLPWHFAMLAQQLLKPILQLYFVPSKYNPAD  
>11\_Sheldgoose\_hepatitis\_B\_virus\_AY494853  
TGKFLVDKNSRNTTEEARLVVDFSQFSKGKNAMEHFPYRWSPNLSTLRRILPVGMPRISLD  
LSQAFYHLPLNPASSRSLVYYFRKAPMGVGLSPFLHLFTTALGSEIARRVWFTYMDDF  
LLCHPNARHLNSISHAVCSFLQELGIRINFDMTPSPVTEIRFLGRIEDMRWTEIRNVIK  
KIKVGEWYDWKCIQRFVGHNLNVLFPFTKGNTEMLKPMYTAISNQVNFSSAYRTLLYKL  
TMGVCKLSIKPKSVPLPRVATDATPTFSKVRDIHVQELLMVCLAKLMIKPRCLLSDSTF  
VCHKRYHSLPWSFAMLAQQLLNPIQLYFVPSKYNPAD  
>12\_Stork\_hepatitis\_B\_virus\_AJ251934  
TGRIFLVDKNSRNTTEEARLVVDFSQFSKGKNAMEHFPKYWSPNLTAALRRIVPLGMPRISLD  
LSQAFYHLPLNPASSRSLVYYFRKAPMGVGLSPFLHLFTTAIGAEISRRTVFTSYMDDF  
LLCHPSARHLNSISHAVCTFLQEFGIRINFDMTPSPVTTIRFLGKIEESRWNELRQVIK  
KIKVQWYDWKCIQRLIGHNLNVLFPFTKGNVEMLKPMYDACHRVNFAFSSRYKILLYKL  
TMGVCKLTLKPKSSLPLPRVATDATLTFKVRDIHVQELLMVCLARLMIKPRCILTSTY  
VCHRKFNLPLPWHFAMYAKQLLTRLTLYYVPSKYNPAD  
>13\_Stork\_hepatitis\_B\_virus\_AJ251936  
TGRIFLVDKNSRNTTEEARLVVDFSQFSKGKNAMEHFPKYWSPNLTAALRRIVPLGMPRISLD  
LSQAFYHLPLNPASSRSLVYYFRKAPMGVGLSPFLHLFTTAIGAEISRRTVFTSYMDDF  
LLCHPSARHLNSISHAVCTFLQEFGIRINFDMTPSPVTTIRFLGKIEESRWNELRQVIK  
KIKVQWYDWKCIQRLIGHNLNVLFPFTKGNVEMLKPMYDACHRVNFAFSSRYKILLYKL  
TMGVCKLTLKPKSSLPLPRVATDATLTFKVRDIHVQELLMVCLARLMIKPRCILTSTY  
VCHRKFNLPLPWHFAMYAKQLLTRLTLYYVPSKYNPAD  
>14\_Parrot\_hepatitis\_B\_virus\_J-274024  
TGRIFLVDKNSRNTTEEARLVVDFSQFSKGQNALRFPKYWSPNLTTLRRILPVGMYRISLD  
LSQAFYHIPLNPASGSRSLVYYFRKTPMGVGLSPFLHLFSAAGSEISRRLWFTYMDDF  
LLCHPNARHLNAVSHAVCTFLQEFGIRINFDMTPSPVTTIRFLGQIEDQRWTELRTVIK  
KISVGKWDWKCIQRLIGHIQFVLPFTKGNSEMLKPMYLAVKEQVNFSSRYKNLLYKL



TMGVCRLTLNPKVSLPLPRVATDATLTFSKVRDIHQEELLMSCLAMLMIKPRCLLSDSTF  
VCHKRYMTLPWNFAVLSKQLLAKVPVYYVPSKYNPAD

>DIRS

-----KRTGGVRLILDSELNKCMYKHFKM--DNIHTVLDLVSP-DNFLASVD  
LRDAYYTVPIHQEDRKYL-WQFKALPNGLSTAPRLF TKLLKPVF SKLRQAI VV-GYLDDT  
ILIAENEEKLKA AVKATTDILAQLGFIIHPEKSVLTP TKEITFLGRLPESKALEVERLCQ  
ELIDTKEPSIRHVARVIGKIVSTFP AVQYG-----  
-----

>ERV2-3\_Pca-I\_ERV2\_Procavia capensis

-----KKS GKWRLLQDLTMESMGALQPGLP---SPNAVPLNYAV-----IVID  
LRDCFFTIPLHPRDRQRFYQWKVLPQGMKNSPTLCQKFVDAAIENVRKQVYLIHYMDDI  
LLAHPNRSFLQECLMALTSALEAKGLVIAPDKIQTQPP--ISYLGHPFFVLR TAHLKTLN  
D-----FQKLLGDINWLRSLKLTADLLPLF-----  
-----

>Gypsy-12\_DTa-I\_Gypsy\_Drosophila takahashii

-----EKKWRLVIDFRKLNEKTVSDRYP---IPNVADILDSIEKTMYFTTLD  
LASGFHQIQMNPRDASKTHYEFTRMPFGLKNAPATFQRVMDNVLGDL---DVCLVYLDDI  
IVFSPSLQKHMADIKSVFTKLQANLKIQPSKCNFL-RKEIDFLGKP-----N  
PLKIQAIKDFPCPKSFLGLLGYRKF IKDFAKITKPI-----  
-----

## Supplemental Dataset 2

CmCc58-R-54 AGGAGTATTGTCTTGAGGCATTG

CmCc58-F-54 GGCAAATCTCTGGAAGTTGAAG

CmCc59-R-54 GATTCACGATTGTCTACCAAAGC

CmCc59-F-54 GTTCATATGGCCTGCATCTG

CmCr20-R2-55 TGGCTCAACTGCAATGATGAC

CmCr20-F2-55 ACAAGCTATAAGAAGTGCCTGC

CmCr20-R1-54 GAGTGATAAAGTCCTTAACAGCATC

CmCr20-F1-54 CTCCCAGAAGTTATAGAAGTTCAGA

CmCr49-R-56 TGATCACACCTCAGAAGGGC

CmCr49-F-55 GATCTACATGATATCCCCAACCATC

CmCr47-R-55 GTGACTAGCCCAAGGTCAC

CmCr47-F-55 TATGATCTACTGGGATCCAGGAG

CmB41-R1-54 CTCTCAATGCAAAGCAACAGAG

CmB41-F1-53 GAGAGGGAACACTTGATGTATTG

CmB41-R2-53 ATTTTGGTGGATGATTCAAGGAC

CmB41-F2-53 CAAAGGCATTTCCAAATCTCG

CmB53-R1-56 GTCTGACCATCCACACAAAACG

CmB53-F1-55 TGGAGCAATAAGACATCCAGATG

CmH207-R-53 AGAAAAGTACAACACTACAAGCAG

CmH207-F-54 GTCTGAACATTGTGATGTGCG

### Supplemental Dataset 3

>EBLN1\_Crotalus\_mitchellii

TTTTGCCAATATCCCCAGATGACACCGAGCCACACCCCGGGATAGGGAAATCTGCCGAA  
ATTGAACATGCAACTAAATGCTTCCTTAATTCACAACACAGGAGCATTACCATCCAGTG  
ACACCAAGTCTTGTATTCTTGTGCTATCTGATCCCTGGACTGTGGTCTGCATTTCAGAGAA  
GCTGGTGTTCACAACATTTTCATACTTTGCTGACCAATCGGAGGGAAAATGAGACAAGTA  
GTTTTATCAACACTGGAATAACTAATGACCCTTTGACCACACTTGAGCTGTCATCCGTTA  
TTGCTCACTGTACAACACTACTTATTGGAGTCATCATTGGTCATCAGCTGGGTCTGCGCA  
GATCAAGAAAAGAATAAAGGCATTGTTTTGTGACATTGGGAAAACCAACACATGCAGAGGC  
AGCAAATGCTCTTCAACTCTTCCCTCCAACCTGCAGCAATAGATGATCAACTCTCAACCAT  
GGGCTAGGAATCTAATTCTGGGTTTGTGGACCACAACCTTTTGAGTCACCCGGGAAAGAGA  
TGATGGCACAGCTATCAATGATTGCGGAGCATGCACAGATGACAACCTACTCCACAATCA  
ATTCATATCTCAACCAATGCATGGATGCAACAATAGCTCTCCCTGCTGTTGTGAAGGAAA  
TTGAGGAATTTGAAAGAGTAACTCGTGACCTCAAAATTAAACTCAAAAAGTTGTTCAAGT  
ATGCTGGAGCAATAAGACATCCAGATGTAATTCAAATAGCTCCTAAAGCTTTTCCAAACT  
TGGCAACTGCTGCCCTTAATTGGAGTAAGAGAAAAAGTACTTCAATGGGAGCATATAAGT  
CACCAGATATCATTCCTGGAGCAACAATAACAGAGTTTATGCTTAGTAGAGCAAGAAAGA  
GCCGTATTGTGAGGTCTGGTGGTGGCGAGGAGATGGGCTCAGCTACATGAAATATTTTGT  
TGAAGTATGGGATTACTGGTTTTAGTACAGAAAAAGATTGAAACAATTCCTTAAAAAAA  
AAATT

>EBLN2\_Crotalus\_mitchellii

GGAAAAATTTGGATCACTTTCTGGAAACTTCTGACAGTATCCCGCTGATGACACAGAGCCA  
CACCCAGGCATAAGGAAGAAGACCAAAAATTGAACATGCCACTAAGTGTTCCTCAACCCCT  
GAACGCAGAACACTGTATCATCCAATGACTCCAAGCCTTGTGTTTTTATGCTATCTGATT  
CCTGGATTATGGACAGCTTTTAAAGAAATGCTGGAGTTCCTACTAGTTCTTACTTTACTCAA  
CTGATTGGTGGGCATGTTCAAAGTCAGTCTCTCACAAATGATGCAATTGAAGATGTTCCA  
CTTACTGCGCTCGAACTGTCAAGTGTGATAGCCATTGCACCACTCTGCTAATCAGTATA  
GTCCTTGAATCATCCACCAAAATTTGCAGCTGGGTCCGCCAAATCAAGAAAAGAATTTAA  
GCAATGTTTGTACGCTTGGAAAACCAACCCATGCCGACATAGCCAATGCACATAACTC  
TTCCCACCTACAGCTGCGGTGGACTGGCTCAACTCCCAACCATGGATTGGAAATCTCATA  
CTTGTTCCTCGACACTACATTCAAAACACCTGGAAAGGAAATGATGGACCAAGTTCAT  
TTAGTTGCAGGTTATGCTCAAATGACAACATACTCAACCATCCAGGCTTATTTGGAACAC  
TGTATGGATGGAACCATAGCCTTACCTGCTGTTGTCAAAGAAATTTGAAGAAATTTGCCAAA  
GTATCAAAACAAATCCACCTCAAACCTTAGACAATGGTTTTAAATTTGCGGGTGCATAAGA  
CATTCTGAGGTAATCAAGCTTGGCTCCAAAGGCATTTCCAAATCTCGCCCTTTACTGGAGT  
AAACAAGAAAGTACATCAATGGGTGCCTACAAAGCGCCAGATATAGTACCAGGTGCGATT  
ATCATTGAGTTTACTCTAGCACACACCCATAGAAGAGGAATAGTGAGAGTGGGCATTGGA  
TATGAGATGGGCCAAACACTACACGTATTCTCTCTGCGTATGGCATAACGGGATTTGAG  
AAAAGTAAAGATTGAACCAATTCCTTAAAAAAAATA

>EBLN3\_Python\_bivittatus

AACCACAGAAGCAGGCCCTGGGATTGGAAAAGGAGGAAGATATAAAAAAAAATGCCAAGG  
ATTTACTTGATCCAGCGTGGCATGACAAATTCATCCTGTCACTGCAAGCCTTGTCTTTC  
TGTGCCTTATTTCAATGGATTACACTCAGCATTAAAACCTGTTGGTGTTCAGAGACTT  
CAGGGCTTTTAACACCAAGGAGGGGAGACCAAAAGGAACAAGTACACTGCACAAGAAAT  
CAACCCAAAACAAAGCTGACGCAGGACTAAGTCCACAGAGCTCACCTTACTCCTTTGCC  
GTTGCTGTGACCTTTTTATTGGACTAGCCATTGGATCCAGCGATAAAATCAGAATCAATA  
GTGCTCAAGTCCACAACATTTTGAACACTAATGGTCTCACTTCAAAAAGAAAACCTACCA  
GCAAATGCAATGCCTATTACACTATACAATGCTGGACATGCTATTGACTGGATCAACTCA  
AAGCCATGGATTGGTCAATTTGGTACTCAATCTTATTGAACCTGAAGCAGAATCACCTGCT  
AAAGAGCTAATAGACCAAAATGAAACTTGTAGCCAACAAGCACAAATGACTATATGTTTC  
AGTGTAGAAGCGTACCTCAAGCAGTGCATGGATGGAACAATTGCTATGAGGCAAGTTGTT  
GCTGAGATACCAAAATTTGAAGCAGCTGTTCCATAGTGAAGAAGAAGACAGGGTCCATG  
TTCAAGTTTGGCAGTGCAATTCGACACCCAGCCATCATCAATCTAGCTCCAAGAAATTTCC  
CGAATTTATCTACAGCTGCAAACTACTGGAAAAAATGGCATAGCCCTCTTTTGCTGGT  
TTTAAAGGCACTGAAGGTTACACCTGGAGCAGCAATATCCATTCCAATGCTGCAACTTGCA  
GCAACGAGGATCTTGAGAGAAGTACGTCCAATCCAGTCTGGCAAGTTGGGCATGCTCCGG

GTTCCATTAGCCAAG

>eSCV1\_Crotalus\_mitchellii

TGGGATTACTATAGAATCAGAAAGCTCAAAGTTGAATTCTTCCCAACATTCCTGGGCTCA  
CAAGAAGAATACTCAAGAGGAACCACTGTTATTGATCTTGATGGCAATATTCAGCAGCC  
ACCACCACCCAGCAGCATATGACCCATTTATGGATAGATCATCAGCACACAACCTGGATC  
CCACACAGATACCCTCAAGATACTTCACACCCAAACCACAACCTCTCTGATGTCCAAGGC  
ACAGCAGCAATCAAGGAATCAGCATTCTCCAGCCAAACAATAAATAAATCAATTTTGG  
CTCAATCCCAAAGATGCTAATGTACTCCACTGGGGTCTTGGTTTCAGCATGTATGTTCCCT  
GAAAGTCTCACAGCCACCCAACCAGTTACTTACTCATGGCTAGTAAAAATCACATACTAT  
GTTCAATTCAGAGAATTTATTTTTTCCATGTGTATGTACTTAACAATTGATTGGAATAA  
AGTTGGCATTTTATCAGACAT

>eSCV2\_Crotalus\_mitchellii

GCCAAAACCCAGGATGGTACTCTGATCGTCTGACATTCCTCTACAAAGCGCATGGACT  
GGAACCCCAACCCAGCACCAACCTGACTGCCAAATATTTATGGGATTACTGTAGGATC  
AGAAAAATGAAAGTTGAATTTTTTCCACATTTCTTGGCTCACAAGAAGAATATTCAGA  
GGAACCACTGTTATTGATCTTGATGGCAACTTACCACAACCGGGAACAACAGCTGCACCA  
AATGACCCGTTTGAGGACAGGTCAACAGCCACAATTTGGATCCCCACAGATACCACTCA  
AGATACTTCACCCCAATAATCCAGTTGATCCAGGACAAAGCCACACCCGCGGGTCCCTC  
TTCTTCCAACCAATAATAATAATAATAATAATCAATTTATGGTTAAATTGTAATGATGACCATG  
CTCCACTGGGGCTTGGATTTCAGTATGTATGTTCCAGAGAGTTTCACTGCTTCCCAACCA  
GTAAAATACTGCTGGCTTGTAAAATCACAATACTATGTTCAATTCAGAGAATTTATTTTT  
CCATGTACACATGCTTAACAATTTATTGGAATAAAGTTGGCATTTTATCAGACAT

>eSCV3\_Crotalus\_mitchellii

CATCCCTGCAAAAGATATGTATTTACTATTAACAATCCCTCCGAAGAAGATTATGATGCT  
GTTAAGGACTTTATCACTCCGGAATACTGCGTTTATGCTATAGTTGGTGAAGAACAAGTC  
TCAACCTCCACTTGCAAGGATTTGTCAACCTAAAGAAGAAGATGAGATTCATCCCTTC  
AAAGCAGCTATTGGTGGAAGAGCTCATGTGGAGAAAGCTAAAGGAACTGATCTGGATAAC  
AAGAGATATTGCAGTAAGCAGAAAGTTTACCTTGAGGTTGCAGAGCCCTCCGCACAAGGA  
AAGAGGTTAGATCTGAAGGAAGCTATTGCTCTGCTGAACAGCGGTTCCCTCAATGACTGAA  
CTTGCCAGGCATATCCCTCCGTATATATAAGATATGGGAGGGGCTGAAAGACTACGTC  
ATCACTGCACAATTTGGCTAGGATGAGAGATTTCAAACCTGATGTACATGTGATCACAGGA  
ATTCCGGGGTGTGGCAAGAGTAAGTTCTATAGTGAACCTGGATGGTGACAAATATTGAAA  
CCCCGTGAAAAGTGGTGGGACGGGTATACAGGGCAAGAGATTGTTATATTGGATGATTTT  
TATGGGTGGCTACCATTTGATAAATTGTTAAGAATTTGTGATAGATACCCTTATAGAGTT  
GAGACCAAGGGTGGTACAATGGAATTTGTTTCTAAGTGTATTTATATCACTTCAAACAA  
GCC

>eSCV4\_Crotalus\_mitchellii

CAAGAAAAGAGGTCAGACCTGAAGGAAGCTATTGCTCTGCTGAACAGCGGTTCCCTCAATG  
ACTGAGCTTGCCCGGCATATCCCTCTGTATATATAAGATATGGGATGGGCCTGATAGAC  
TACGTCATCACTGCACAATTTGGCTAAGATGAGAGATTTCAAACCTGATGTACATGTGATC  
ACAGGAATTCGGGGTGTGGCAAGAGTAAGTTTGTAGTGAACCTGGATGGTGACAAATAC  
TGGAACCCCATGGAAGTGGTGGGATGGGTATACTGGACAAGAGATTGTTATATTGGAT  
GATTTTTATGGATGGATACCATTTGATGAATTGTTAAGAATTTGTGATAGATACTCTTAC  
AGAGTTGAGACGAAGGGTGGTACAATGGAATTTGTTTCTAAGAGTATT

>eSCV5\_Crotalus\_mitchellii

AAGATGAGAGATTTTAAAACGGAAGTCCACGTCATCATGGGAATCCCCAGGTGTGGCAAG  
AGTAAGTTTTGTAATGAACCTGAAGGAGAGAAGTACTGGAAACCGGGGAAAAGTGGTGG  
GATGATACACTGGACAAGAGATTGTGATATTGGATGATTATTATGAGTTGGCTCCCCTTT  
GATGAATTGTTAAGATTGTGTGATAGATATCCCTACAGAGTGGAGACTAAAGGGGAACT  
GTTGAGTTTGTCTAAGACCATTTATATCACTTCAAACAAACCTGTTAAGGAATGGTAT  
AATGAGGAATATTGCTTGGAGCTTTGTTTGAAGAATCACTTCATACAAAATAATGAGA  
AAAGGAGAAGGCATGTCTGATAAAATTCCA

>eSCV6\_Python molurus

GTTGTAAAAGAAATGCTAGGGGGAAGAGCCACCTTGAAAAACAAAAGGTACTGACCTG  
GATAATCAGACGTACTGCTGTAAGGGTGGTGATTTTATTGAGATCAGTGAGTCTTCCAA

CTAGGTAAAAGGAATGACCTGGACAACGCTGTTGAGCAATTGCATGAAACT

>eSHBV1\_Crotalus\_mitchellii

CCAAACTACAAGAGCCTGTCCAGAATTCTCCCTCCGATCATGTCTCGCATCTCCTTGGAC  
TTCTCTGAGGCTTTTTAATCATCTTCCCTCATCATCCTGAATCTGCCGCTCACTTTCTTAT  
ATCTGATGGGACACACGCTTATGGGTTTAGGAAATGTCCTAACACCATCGCAGACCATAT  
TCATTGCAGATGCAACTTATTCTGCTTTGCTTATATGGATGACTTCATCAGCTCTCATCC  
AAACCGTAAGTACCTTGCTGCCATTAGCCATAGTTGCATTGAGTGTCTCAAACCTTACAG  
AATCCGGATAAATTATGATAAATTATGCCTGAACCTGTACAAGACATTCATTACATTGGC  
TATTGAATTACTGACAGGACTCTAGGTATTCCTAAAGAACATCAAGAAAAATGTATCAAC  
ATTCTAAAAGAAATTGATTGTAAAAAATGGTATGATTGGAAAAAATAGCACATTTTCATT  
GGGCATTTAAGCTTTCTTGCTGGTTTTTCTTCCCTTTCAATGGTCTTTTCTAATCACTCTA  
TATGCTATATGTAATAAGTCCGATGTACAAATTTTCCAAATGGTATAAACAGTTATTGTTA  
AAAAGTGTAAAACGTTGATCCATGGAACTATTGTTGATTTAAGAACATCAAATAATGTC  
ATAATGAAATTCAAACAATCTAGACCAATCCATGGACAAGAACTATTTCTGTTATTCATT  
ATCAACTTTGTGCTGTATTTTGTGATAGTATGTTTGTGTGCACAAATGCTTTGATCATT  
TACCATGGATGTTTTTCATGTTATGTACTTTGTACGTGGCATAAACAAAACTTGTGCTAC  
ATGGCATCAGAAGACAACCCTGCTGATCTTCCCGCCTTTTGCATCTAAGGTCAAAGACA  
CTGCTGTACCCTCTCCTATTTAAGCCTTGGGTGCCCAAGCTCTCT

>eSHBV2\_Crotalus\_mitchellii

ACTGGTAAGTGTCTTCTGGTTAACAAGAATTCTAAAGATTCTTCAAATGCAGATTGGTG  
GTGGACTTTTCTCAGTTTTTCGAGGGGAAGTGCCAAACTGCACCTTTCCAAAATACTGGAGC  
CCAAACCATCTCTCACTTGCAAGGATGCTGCCCAATGACATGTGGAGGATTCCTTGGAT  
ATGTCTGAGGCGTTTTATCATATTCCTATGCATCCTCATTCTTCTACTCACCTTCTTATT  
TCTGATGGGAGTCAAGTCTACGGATTTTCGTAAGAGTGCTATGGGAGTCGGTCTTAGCCCT  
TTCTCCTTACTATGCTCACTAACCTCCTTGCAACAAACATTCGTTGGACTTTCAATATT  
TTCTGTTTTGCTTATATGGATGACTTCATACTCTGTACCCAAACTACAATTATATCCAT  
GCAGCTAGTTCTGCTATTTGCAACCATCTACAAAACCTTGGGATCGTCATAAATAAAGAT  
AAAATGACTTTAACTCCAGCGAAAGAAATTAATAATTTGGGACTCACAATTTCCGGCAAGA  
TTATTAAGACCTCCTCAATCATATAGAAAAGAATTATCAAATTTAATAATGACATAAAT  
ATAAATCACTGGTATGACTGGAAATGTATTCACGGTTTTATCGGAAAACTTGGCTTTGTT  
TTAGGATTTACGGTTTTATGGATATGCGATTTTACAGCCTTTGTACACAGCAATGTCTGAA  
CATTGTGATGTGCGTTTTACTTTGTATTATAAAAATGTATTGATAAAAAGTGGTAAAATCA  
ATCAAAAAGCATTACGCTGAGAACAAAAGAAAAATATCCTATACCTAATTTTGCTGTTGAT  
GCTTGTTTAGAATCATGTGCTTGGGTAAATTTGAAAATCAATTATATAATACTTTGTAT  
TTCAGAAATGATTATCCTATTCATGTAAAAGAATTGTTAATCACTCTGTATGTTATAGTT  
AATTTTCAACCTAAAGCTATTGAAACTGATTCATATGTATGTTTTACACAAACATTTCAAC  
ACTTTGCCCTTTGGACTGATGATGTTGCTTATGATACCATGAGACACGTACGCATGTAC  
TTTGTCCGAAGTCAAGATAACATCGCTGAT

>eSHBV1\_Ophiophagus\_hannah

AATCCAAACTACAAATGCCTGTCCAGAATTCTCCCTCTGAACAGGTCTCGCATCTCCTTG  
GAATTTCTCTGAGGCTTTTTATCATCTTCTTCATCATCCTGGTGTCTGCCACTTGCTTTCT  
TACGTGTATCTGATGGGAAACATGTTTACAGGTTTAGGAAATGTCCATGAGGATGGTC  
TCAGCCCCCTCAACCTCACTCTCTTCACTAATGCCATTGTAGACCACATTTATCACAAT  
ATATCATATCTTGTTTTACTTATTTAGATGACTTCATCCACTCTCATCCAAACCCTAAAT  
ACCTTGCTGCCACTAGCCACGGTAGCATTCAGGGTCTTCAAACCTTATGGAACCTTGATAA  
ACTATGATAAATCAACACCTGAACCAATACAGGACATTCATTACATTGGCTACTAAATTA  
CTGCCAGGATAGGAATATATATATATGATAGGTAGAGGGGTGGATTTCTACCGGTTCTGTC  
CGGTTCTGTAGAACCAGGTAGCTGTGAAGATCAGCAGACATAGAACCAGGTTCTATGTNNGC  
TGCTGTTTTGGCCCCCGCCCGCCCGGGCTTTACCTGTCTTGGCGTGGCACAGCTGCT  
GTTGAAAAAGCAGGAAAAAGGGCTTTTCCAACCTTCTGCGCACCCCGCACGCAACACTGCTC  
AGCTGTCCGAGCAGCTCAGCAAGTCGTAAATTGCCCTCGTGCAGCTCGCGGACTCACGC  
ATGCGTGCAGCAGCAGAACAACAGAACCAGATAGTTATACCAGTCCGATCCCATCCCTGT  
ATAGGTATATAGGAATATCAAGAAAAATGTACCAACATTTCTAAAAGAAATGATAGTAAG  
AAAAGGTATGATTGGAAAAATAATGCAATGCTTAGTAGGGTATTTAAAACCTTTCTTGATGGT  
TTTTCTTTCTTTCAGTGGTCTTTTCTAATCCCTCTGTATGCTATATGGAAATAGGTCTGAT

ATACAATTTTCCAAATAGTATAAACAGTTATTGTTAAAAATTATTTAAACATTTTGACCC  
ACAAAGCTATTGTGGATTTAAGAACATCAAATAATTGTTGTAATGAAATCAAACAATCT  
AGACCAATCCATGTACAAGAACTATTGGGTTTTTTTGCTTTGTTATTCATTCTCAACCTC  
ATGTTGTATTTCTGATAGTATGTTTGCTGTGCACAAACACTTTGATCATTTACCACGGA  
AGTTTTCCATGTTATGTACCTTGACTTGCATAAACAAAACATACTATGTGGCATCAGAA  
GATAACTCTGCTGATCGTCCTGCC  
>eSHBV3\_Ophiophagus\_hannah  
TTGTGGTTACATGTAAAAATGATCGTTTGGGATGAACAACCAGTTTTGGAATATATCACT  
AAATTGAGAGAGTGGTTAGGAACCCCAGCTAAATATAAAGGACAAAATGTACCACTTATT  
GAGGAAGTCTTTGCTCCCATCAGGAGCCCAAGTGTAGTGAGGGGAAC

Supplemental Dataset 4

>Crotalus\_mitchellii\_EBLN1\_contig\_173953  
TTTTGCCAATATCCCCAGATGACACCGAGCCACACCCCGGGATAGGGAAATCTGCCGAA  
ATTGAACATGCAACTAAATGCTTCCTTAATTCACAACACAGGAGCATTACCATCCAGTG  
ACACCAAGTCTTGTATTCTTGTGCTATCTGATCCCTGGACTGTGGTCTGCATTGAGAGAA  
GCTGGTGTCCAACAATTTCACTACTTTGCTGACCA-ATCGGAGGGAAAATGAGACAAGT  
AGTTTTATCAACACTGGAATAACTAATGACCCTTTGACCACACTTGAGCTGTCATCCGTT  
ATTGCTCACTGTACAACACTACTTATTGGAGTCATCATTGGTCATCAGCTGGG-----  
-----TCTGCGCAGATCAAGAAAAGAATAAAGGCATTGTTTGTGACATTGGGAAAACCA  
ACACATGCAGAGGCAGCAATGCTCTTCAACTCTTCCCTCCAAGTGCAGCAATAGAT--G  
ATCAACTCTCAACCATGGGCTAGGAATCTAATTCCTGGGTTTGTGACCACAACTTTTGAG  
TCACCCGGGAAAGAGATGATGGCACAGCTATCAATGATTGCGGAGCATGCACAGATGACA  
ACCTACTCCACAATCAATTCATATCTCAACCAATGCATGGATGCAACAATAGCTCTCCCT  
GCTGTTGTGAAGGAAATTGAGGAATTTGAAAGAGTAACTCGTGACCTCAAAATTAACCTC  
AAAAAGTTGTTCAAGTATGCTGGAGCAATAAGACATCCAGATGTAATTCAAATAGCTCCT  
AAAGCTTTTCCAACTTGGCAACTGCTGCCCTTAATTGGAGTAAGAGAAAAAGTACTTCA  
ATGGGAGCATATAAGTCACCAGATATCATTCCTGGAGCAACAATAACAGAGTTTATGCTT  
AGTAGAGCAAGAAAGAGCCGTATTGTGAGGTCTGGTGGTGGCGAGGAGATGGGCTCAGCT  
ACATGAAATATTTTGTGAAAGTATGGGATTCAGTGGTTTTTTCAGTACAGAAAAAGATTGAAAC  
AATTCCTCTTAAAAAAAATT-----AGC  
TACCAGTCTGCCAAACTGGTGAGAACCAGCTGAATCTCACCATGGCTACAGGAGAATA  
GATAAATAGTGTAGCACTTTAGTGGGAAACGGGTGGCGTTTTTGTGTGGATGGTCAGACCC  
CTGTTGTGCTGGATCAACCTAGATGTGATGCTCAACTGTGAGACAACATCAGTAATGAGA  
AAAGACCCCAAGTGATGCCATATGATTCTGCTCGTTTTTCTGGTATGGTAGGGTTAGTTT  
GCCCTCTGTGGTGCACCTTGGATAGAGTGCAAGTGCAAATAAACAGACTAGCAGTAGCC  
AAATAACTACTTTGTACTAATACTGCACAGGTAGTAGTCCTTGACTTACAACAGTTCATT  
TAGTAATCGTTCGAAGTTACAATGGCACTGAAAAAGTGACTTATGACCATTTTTTACAC  
TTATGACCGTTGCAGCATCCCCACGGTCACATGATTTACATTTGGATGCATGAAAAGTGG  
TTCATATTTATGACCGTTGCAGTGTGATGTGATCATCTTTTGTGACCTTCTGACAAGCAA  
AATCAATTGGGAAGCCAGATTCCTTATCAACCATGTTACTAATTTAACAATGGCAGTGA  
TTTCACTTAACAAATGTGGCAAGGAAAGTCATAAAAATGGGGCAAAATTCACTTAACAAA  
CTTGGCAACATAAATCTGGGCTCAATTGTGGTCTGATCGAGGCTACCTGTAGTCTC  
ATGGCTAATTGTACCATCTCCTTATGCTAAATAACTGGCATCACACAGAACCACACACA  
CCCCTTAACATCCTCAATTTTGGGGGTGGGTGGAGAGAAGGAGAGGGATTAATCCAAGGC  
CCCTGCAATGGGTCTCTCTCCTCTTCTTAAATCTCCACATAAAAACGGCTGGGTGGCAT  
GTGGCGTTGGGCTGATGATGCCAATATGGATCATAACCCCTATTTATACATCTCCAAGCC  
TGGCTGGGCAGGTGAAGTTGTAGTGGTATTGACAGCAGCTAGGATGCTCAGTTTCAATCA  
CATCTGTCTCTCGCCACACGGCATCTCTGAAAACAATTAGGGCTTCCCAGATGACAATT  
GCCATTTTCATCCCATCTGCTCTGGGATTGTGACCTGTTATGAAATCTGGAATCCATCTCA  
GGTGAAGGGGACATTGAGGAGTCGCAATTTTACAGCCAGATCAGCTGCCTCCTCCACAGC  
AAACCCCTGGATGAGAGAATCCTCATCACATACTGACCTGACATTTTGCAGCACCTTTTG  
TAAGCCGTCAAGACTCATTGAATTAAGCAGAATATATAAGTAATAAATAAAGAAGTGAGG  
GGAACAAACAATGCAAAATATTGGTAAATCATATAAAAAGAGCATGGTGTGAATTTTACT  
TGTGCATTTCAATATAACAGCAGCTTTTCTTCCCTCTTGAAACTAAAAGATGTTGGAAGG  
AGAACAGTTCCTAGTGGATTTTAACTAGGGGGGGAGAGAAGCTCAGTGACGTTGTGTCA  
TTTATTAATAATGCGATTGATCGGGAAGAACAATTCCTTATTACCAGCCTAAATGTGAAC  
TCTTATCAATGTCCTCACTTCTCTTCCAAAAGCAGTACTCCTGGACTGATCAACAGCCC  
ACAGGAAACCAACAATTGCTTTAGAAAGTGGTAGGGAAGCACTACACAGGCAAAATCCAT  
CTGCAGGAACCAAGTATCTGGTCTCTGATGCAGTCCAGCAAGCAAGATGGTTCATGGTGG  
ACATGTTGAAGGATTGGAGGGGAGGCTGAGGATGGGATGGTGGCAGTATCATAAGGATG  
TGTTATTTAAGGATTAATGTTTCATGCTGCAGCTAAAGGACATGAGGAAGAGTGCTATCT  
TAGGTAGACCATGATTCCAGTGACATCGTTATCTGAAGGATTATCTCTACCCAAGTTAC  
ATCTATTCAATCTACCAGAGCGGTGAAAAGTCAAATATGGCTTTTTTTAGGCTCATGCCTCA  
GTATGCATATTTTCCAATGAGACAGACCAAGACAGGAAGATCAATTCATTACAATTTATC  
AGAGTATTAATACAAAAGGGATTCCCTCTCATAGAAAGAGGGAACCCAGATCCTTAGCTTG  
CATCCCATTTTATAGTTAATACAACAAAAGAAAATGCAACAGGAAAGTTGATTGGACAGGA





Supplemental Dataset 5

```
>Crotalus_mitchellii_EBLN2_contig_72541
--ATTTAAGCTAGAATTGGATATTCTAAATATATTATGCTATTTGAGGGAAAAAGAGAGG
GAACACTTGATGTATTGATTGTACTATGTATATACGTTTTGTTTTATGTTTGATTACAAT
GAAGGG-----GAGGAGGAGGAGTTGATGTACATA
GAAGGCTTTAGCCAATCTGCAGGAAAATTTGGATCACTTTCTGGAACTTCTGACAGTAT
CCCCTGATGACACAGAGCCACACCCAGGCATAAGGAAGAAGACCAAAATGAACATGCC
ACTAAGTGTTTTCTCAACCCTGAACGCAGAACACTGTATCATCCAATGACTCCAAGCCTT
GTGTTTTTATGCTATCTGATTCTGGATTATGGACAGCTTTTAAGAATGCTGGAGTTCCT
ACTAGTTCTTACTTTACTCAACTGATTGGTGGGCATGTTCAAAGTCAGTCTCTCACAAAT
GATGCAATTGAAGATGTTCCACTTACTGCGCTCGAACTGTCAAGTGTGATAGCCCATTGC
ACCACTCTGCTAATCAGTATAGTCCTTGAATCATCCACCAAAATTCAGCTGGGTCCGCC
CAAATCAAGAAAAGAATTAAGCAATGTTTGTACGCTTGGAAAACCAACCCATGCCGAC
ATAGCCAATGCACTACAACCTTCCCACCTACAGCTGCGGTGGACTGGCTCAACTCCCAA
CCATGGATTGGAAATCTCATACTTGGTTTTCTCGACACTACATTCAAAACACCTGGAAAG
GAAATGATGGACCAAGTTCATTTAGTTGCAGGTTATGCTCAAATGACAACATACTCAACC
ATCCAGGCTTATTTGGAACACTGTATGGATGGAACCATAGCCTTACCTGCTGTTGTCAA
GAAATTTGAAGAATTTGCCAAAGTATCAAAACAAATCCACCTCAAACCTAGACAATGGTTT
AAATTTGCGGGTGCCATAAGACATTTCTGAGGTAATCAAGCTTGTCCAAAGGCATTTCCA
AATCTCGCCCTTTACTGGAGTAAACAAGAAAGTACATCAATGGGTGCCACAAAGCGCCA
GATATAGTACCAGGTGCGATTATCATTGAGTTTACTCTAGCACACACCCATAGAAGAGGA
ATAGTGAGAGTGGGCATTGGATATGAGATGGGCCCAAACACTACACGTATTCTCTCTGCG
TATGGCATAACGGGATTTGAGAAAAGTAAAGATTGAACCAATTCCTTAAAAAAAAAATA
-----AGGCTGTAGTATTATTATCTTTTT
CATCTTCTTACTACCAGGTGTTATTGGTATTACATTATGATTATTATTACTCTGTTGCT
TTGCATTGAGAGCTTTTGCACCAGAGATAAAATTCCTTGTGTATCTAATCATCTTGACCAA
ATAAAGTATTCTGTTCTATTCTGTTCTATTCTATTTTCTATTTCATACACCTGGCAATCAA
TCATATCAATGCATATCAATCCTTAGTCCAGGTCCACATCCTTGCCGATAAGTGCTCTAT
AGAAAGAGTGCAAAAAAAGATTATATGAGTGATAAGAAAAATAAAAAGAAAAGGAAA
>C. aquilus_EBLN2
```

```
-----GG-----GAGGAGGAGGAGTTGGTGTACACA
GAAGGCTTTATCCAATCTGCAGGAAAATTTGGATCACTTTCTGGAACTTCTGACAGTAT
CCCCTGATGACACAGAGCCACACCCAGGCATAAGGAAGAAGACCAAAATGAACATGCC
ACTAAGTGTTTTCTCAACCCTGAACGCAGAACACTGTATCATCCAAGTACTCCAAGCCTT
GTGTTTTTATGCTATCTGATTCTGGATTATGGACAGCTTTTAAGAATGCTGGAGTTCCT
ACTAGTTCTTACTTTACTCAACCGATTGGTGGGCATGTTCAAAGTCAGTCTCTCACAAAT
GATGCAATTGAAGATGTTCCACTTACTGCACTCAAACCTGTCAAGTGTGATAGCCCATTGC
ACCACTCTGCTAATCAGTATAGTCCTTGAATCATCCACCAAAATTCAGCTGGGTCCGCC
CAAATCAAGAAAAGAATTAAGCAATGTTTGTACGCTTGGAAAACCAACCCATGCCGAC
ATAGCCAATGCACTACAACCTTCCCACCTATAGCTGCGGTGGACTGGCTCAACTCCCAA
CCATGGATTGGAAATCTCATACTTGGTTTTCTCGACACTACATTCAAAACACCTGGAAAG
GAAATGATGGACCAAGTTCATTTAGTTGCAGGTTATGCTCAAATGACAACATACTCAACC
ATCCAGGCTTATTTGGAACAATGTATGGATGGAACCATAGCCTTACCTGCTGTTGTCAA-
```



Supplemental Dataset 6

```
>Crotalus_mitchelli_eSCV1_contig_224958
TACTTATAAGAAAGACTGATCCTCTACTATAAAATCTTATTGATCGATGCAGCATCAAAAA
TGTATTGGAATTATCTGTCTCCTTCTTGGCAAATCTCTGGAAGTTGAAGAACTTACTCAA
ACCACACAAGACTGTGGATTCTGGATCTTGATCATTGGATAGATCAAATGGTACTCTGAC
AGAATTACTTTACACTGGGCAGAGCATGGGGTGAAGCCCTTATATGAAGGGATGTAAT
GCTGGAACCAGAAAATACTTA-----
-----TGGGATTAC
TATAGAATCAGAAAGCTCAAAGTTGAATTCCTTCCCAACATTCCTGGGCTCACAAGAAGAA
TACTCAAGAGGAACCACCTGTTATTGATCTTGATGGCAATATTCCAGCAGCCACCACCACC
CCAGCAGCATATGACCCATTTATGGATAGATCATCAGCACACAACCTGGATCCCACACAGA
TACCACTCAAGATACTTCACACCCAAAACCAACTCTCTGATGTCCAAGGCACAGCAGCA
ATCAAGGAATCAGCATTCTTCCAGCCAAAACAATAAATAAATCAATTTTGGCTCAATCCC
AAAGATGCTAATGTACTCCACTGGGGTCTTGGTTTCAGCATGTATGTTCCCTGAAAGTCTC
ACAGCCACCCAACCAGTTACTTACTCATGGCTAGTAAAAATCACATACTATGTTCAATTC
AGAGAATTTATTTTTCCATGTGTATGTACTTAAACAATTGATTGGAATAAAAGTTGGCAT
TTTATCAGACAT-----CCCTTCTCCTTTTCTCATTATTTTGTATGAAGT
GATTTCTTCTAAACAATGCCTCAAGACAATACTCCTCACTATAACCACCTTTTCACAGGTTT
GTTTGAAGTGATATATATACTCTTAGACACAAATTC AACAGTACCACCCTTGGTCTCAAC
TCTGTCTTGCAATCCTGTTCTATGGCTCGCAAGGGGTAAAGCACCTATCAACACTGGG
ACTGAAAAATACCCATCTGAATATTGTCCAACGATCCAAATTCCTTTTCTGCTGAAAGA
GGTTGATTAATTAGTGCTGGATTATCTCAAGCAGATTCCGAACCTCATAGTGCGTGAATA
TAAGACCACCAGTAAGATAATAAACTTTATTTGTGAAACGGAAAAATATCCCCCAAGAAAG
CCAAAGTAAAACTATTTTTATACTGTGGCCAAGAAAATTACACAGATGGGTCCGTGCAGT
AACTAGAAGTAGAGTTTAGCCGAGGGAGTCTTTGCCATTTGTTTTTATATATTTGTATG
AAAAGTCTTGAAGAAAGGCTTTGCTTCAAGGAAGTCTTTGAAAAAGACTGTTTTGAAGCG
GTTTTGCAAAAAGAAAGGTCACAGCACTTACGTTCTGCAATAGAGCCACTGTGGAGCAAC
AAAGATGACACTTTGATGGCTTTTCAAGTGTGTTTTGCAAGGGGAGAAGACATACATGTTT
ATACAAAATGTCTGTGCAAGCAAAAAGAGAAGGGGCTCAACCTAATGCTTCAGAACAAGAG
ACAGCAGACACTCAATTGCATCTTAGTGTAATTTCCCTGTTGTATGATTATTAATAGGGA
TGAAATGGATTGTGGCACCTTAAAAACCAACTAGAGAATCCCTGTCTGTTGTTTTCAGAT
ACATTTCCCTTACAGAGAAACAGAATGACCAAGGGTAAACAAAAAAGCAGTGGGAATGAC
TTCCAACCTCTGCTGGCTTACCCATTGAGTATCTTTCTGAGAACCTGGTAAGATCCATTG
CAAATCTCCCTTCCCTTTCCCTTCCCTTCCCTTCCCTGCCCCTGCCCTGCCCTGCCCTGAAG
GAAGATAAGTGGGTGGCAGTAGGCAAGGGAGCAAAGGATTGCAAGATTGGCTGGGAAACT
GTCATGGAAGGTCAAAAATGTCAATCACATGACTGAAATAGTACCCTAGGAATACAGCAA
CCCACCAGTAACATCAGATTAGTTACAGCTTTCCCAAGTTTTATTTCCCTGGGAGTCATG
GGTCATGGATTTTGGACACATTCTGTAAGTTAGCCATTTGTAATACCTTTGTTCAAAC
GATTGCCCTATGATACACCAATAGTCATTACATTGAAAATTTTGGTAGTATATAGATTGA
TTTATCACAGCACTTGTCTACAAAAGAGCAGCAGTATTTTGCAGTGGTTAAAGCACCAAA
CTAGAAACTGAGAAATATGAGTTCTAATCCTGTCTTAGGCACCATGCAAGTTGGGTGAT
GTAGGCGAGTCACTTCTGAAAATCTTGCCAAGAAAACCTGCAGGGACTTTTACAGGTAGTT
GTCAGGAATCAGAGATAAGATAAAGGGACACACTCAAACATGTTTACAAAACCTGCGTGAC
CCATAAATTTGTTCCACCGAAATGTCAATCTTTTTATGGGTGCTTCATGGCTTGCAATGG
TGCCATTAATGATGTTACTCAGGAGCAGAGGCAAGCATTGTTAAGGCTTTGCATTTGTTT
GTTTGTTCATGAGGCCATAGGGAAAAATCATATTACACCTTAGAATTGTAACAACTG
AGAAGAAAAGATCCCCTAGAAAGTTGTCCGCTTTGCTAACATTTTGTGTGTGTGTGTG
AATTTGGTAAGTAGGATGCTTGCATATGCAAAAAGGGTCATTGAGAATGAATATTGCCAA
CTTTTATTTAAGTAGTGTCACTTTGGGGGTGTTGTTTATCTTTTATTTCAATCTTTACTAG
TGAAATGAAACTCTCTTTGGGTGGCAGACACAAAACCTTACGAAATTGTATCATAAGGCTG
ATGAAGGCATAAAATGTCGCTTACACTGTGAATTTTACCTTTTTCGACAGACTGTTTCATC
ACATTTAAAAAGTGAAGGCATGAAAAATAAAGTACATTTGTAAGAATATTTCAATTCAGG
GTATTTTTAAGATTCCTTCCAACAGATTATTCAGAAGGGATCTCAGAGAAGCATTACTCCA
GTCCACAGAGAGAGGATTAACCTTTGGAAAAGGCTTGTTTAAAATTTCTTCTAGCAAATATA
TCAAGCAGAGTCCATGCGGTCTACACTATTCCTGACATCTAATTTTATCTTTATTATTA
```

TTATGGTATAATAGCTGGGCTTCTTAATCAGTAGTTCTTACTCGCAAATCAATGGAACAG  
CTAACTTAAAGTTTTTGGTTGAATTAACCTTATGTAAATACCTAACTCTTGTATGTTGCA  
AAAATTTCAATTTGAATCAATCAGAACAGAGCCAGAAGGGACCTTGAAAGGTCTTCTAGT  
CGAACCCACTGCTCAAGCAGGAGACCCTATCCATTTTCAGACAAGTGGCTGTCCAGTTTT  
TTTCTTAAAAACCTCCAGTATTGGGGCACCCACAACCTTCTGAAGGCAAGCTGTTCCACTG  
ATTAATTGTTTTTCATTGGAAGGAAGTTTTTCCCTGAATTCCAGGAGAAAATTCCTCCTTGAT  
CAGTTTCCTGCACATTTGTTTCACTGCATATCTAAATTAGATTGTTTATTGGGTCATCAA  
CTTCTTTTCATCAGTCTATAATAATAAGCAATTTAACCACATTCTGAATTTTGGGGGAATG  
TTGTGGTTGGTTTGTATCCTTCATAGCTTCACTATTTTCATCTGCTCATGATATAGGTAGC  
AATTTATAGGTAATCTTTGATTTACAAGGATTGTGACTACATCAATGAGCCGAGGTGGCA  
CAGTGGTTAGAATGCAGTACTGCAGGCTACTTCTGCTGACTGCCAGCAGTTCGACAGTTC  
GATTCTCAGTGGCCCAAGGTTGACTCAGCCTTCCATCCTTCCGAGGTCAGTAAAATGATG  
ACCCAGATTGTTGGGGACAACAGGCTGACTCTGTATTCCATTTAGAGAGGACTGTAAAGT  
ACTGTGAAGTGGTATATAAGTCTAAGTGCTATTGCTATCACTTAATGGCTACAATTCTGT  
CCCTGTTGTGGTTGTTAACTGAGAATTGTGGGTTGTTACGTGACTACTGACCCTAATCCA  
AGCCATTTGGGTCCTTGTCTCTCCTAGTGGTTAGAATGCAGTGGGATATTTGTAAATATT  
AACTGGGCAGCCGTATCAGTTGGTAATGAGGAACTATTGCTTGATTGTTCTCATTGTCA  
GAAAAATTCCTTATTTCCAGGTTGAATNNNNNNNNNNNNNNNTTCCATCCATTATTCC  
TTGTCTGGCCTTCAGGTGCTTTGGAAAAAAGGCTCACCTCTCTTCTCTGTGACAGCGC  
CTCAAATATTGGAAGACTGCTATCATGTTTCCCTAGTCCTTCTCTT

>C. aquilus\_eSCV1

-----  
-----  
-----CTGGATCTTGATCATTGGATAGATCAA-TGGTACTCTGAC  
AGAATTACTTTCACACTGGGCAGAGCATGGGGTGAAGCCCTGATATGGAGGGATGTAAT  
GCTGGTACCAGAAAATACTTA-----  
-----  
-----TGGGATTAC  
TATAGAATCAGAAAGGTCAAAGTTGAATTCCTTCCCAACATTCCTGGGCTCACAAGAAGAA  
TACTCAAGAGGAACCACTGTTATTAATCTTGATGGCAATATTCGAGCAGCTACCACCACC  
CCAGCAGCATATGACCCATTTATGGATAGATCACCAGCACACAACCTGGATCCCACACAGA  
TACCACTCAAGATACTTCACACCCAAACCACAACCTCTCTGATGTCAAAGGCACAGCAGCA  
ATCAAGGAATCAGCATTCTTCCAGCCAAACAATAAATAATCAATTTTGGCTCAATACC  
AAAGATGCTAATGTACTCCACTGGGGTCTTGGTTTCAGCATGTATGTTCCCTGAAAGTCTC  
ACAGCCACCCAACCAGTTACTTACTCATGGCTAGTAAAAATCACATACTATGTTCAATTC  
AGAGAATTTATTTTTTCCATGTGTATGTACTTAACAATTGATTGGAAATAAAGTTGGCAT  
TTTATCAGACAT-----CCCTTCTCCTTTTCTCATTATTTTGTATGAAGT  
GATTCTTCTAAA

>C. triseriatus\_eSCV1

-----  
-----  
-----AAATGGTACTCTGAC  
AGAATTACTTTCACACTGGGCAGAGCATGGGGTGAAGCCCTGATATGGAGGGATGTAAT  
GCTGGTACCAGAAAATACTTA-----  
-----  
-----TGGGATTAC  
TATAGAATCAGAAAGGTCAAAGTTGAATTCCTTCCCAACATTCCTGGGCTCACAAGAAGAA  
TACTCAAGAGGAACCACTGTTATTAATCTTGATGGCAATATTCGAGCAGCTACCACCACC  
CCAGCAGCATATGACCCATTTATGGATAGATCACCAGCACACAACCTGGATCCCACACAGA  
TACCACTCAAGATACTTCACACCCAAACCACAACCTCTCTGATGTCAAAGGCACAGCAGCA  
ATCAAGGAATCAGCATTCTTCCAGCCAAACAATAAATAATCAATTTTGGCTCAATACC  
AAAGATGCTAATGTACTCCACTGGGGTCTTGGTTTCAGCATGTATGTTCCCTGAAAGTCTC  
ACAGCCACCCAACCAGTTACTTACTCATGGCTAGTAAAAATCACATACTATGTTCAATTC  
AGAGAATTTATTTTTTCCATGTGTATGTACTTAACAATTGATTGGAAATAAAGTTGGCAT  
TTTATCAGACAT-----CCCTTCTCCTTTTCTCATTATTTTGTATGAAGT

GATTCTTCTAAA

>C. atrox\_eSCV1

-----  
-----  
-----CTTGATCATGGGATAGATCAAATGGTACTCTGAC  
AGAATTACTTTACACTGGGCAGAGCATGGGGTGAAGCCCTGATATGGAGGGATGTAAT  
GCTGGAACCAGAAAATACTTA-----  
-----  
-----TGGGATTAC  
TATAGAATCAGAAAGGTCAAAGTTGAATTCTTCCCAACATTCCTGGGCTCACAAGAAGAA  
TACTCAAGAGGAACCACTGTTATTGATCTTGATGGCAATATTCCAGCAGCCACCACCACC  
CCAGCAGCCTATGACCCATTTATGGATAGATCATCAGCACACAACCTGGATCCCACACAGA  
TACCACTCAAGATACTTCACACCCAAACCACAACCTCTCTGATGTCCAAGGCACAGCAACA  
ATCAATGAATCAACATTCCTCCAGCCAAACAATAAATAATCAATTTTGGCTCAATACC  
AAAGATGCTAATGTACTCCACTGGGGTCTGGGTTTCAGCATGTATGTTCCCTGAAAGTCTC  
ACAGCCACCCAACCAAGTTATTTACTCATGGCTAGTAAAAATCACATACTATGTTCAATTC  
AGAGAATTTATTTTTTCCATGTGTATGTACTTAACGATTGATTGGAAATAAAGTTGGCAT  
TTTATTAGACAT-----CCCTTCTCCTTTTCTCATTATTTGTATGAAGT  
GATTCTTCTAAACAT

>C. tigris\_eSCV1

-----  
-----  
-----TGTGGATTCTGGATCTTGATCATTGGATAGATCAAATGGTACTCTGAC  
AGAATTACTTTACACTGGGCAGAGCATGGGGTGAAGCCCTTATATGGAGGGATGTAAT  
GCTGGAACCAGAAAATACTTA-----  
-----  
-----TGGGATTAC  
TATAGAATCAGAAAGGTCAAAGTTGAATTCTTCCCAACATTCCTGGGCTCACAAGAAGAA  
TACTCAAGAGGAACCACTGTTATTGATCTTGATGGCAATATTCCAGCAGCCACCACCACC  
CCAGCAGCATATGACCCATTTATGGATAGATCATCAGCACACAACCTGGATCCCACACAGA  
TACCACTCAAGATACTTCACACCCAAACCACAACCTCTCTGATGTCCCTAGGCACAGCAGCA  
ATCAAGGAATCAGCATTCTTCCAGCCAAACAATAAATAATCAATTTTGGCTCAATACC  
AAAGATGCTAATGTACTCCACTGGGGTCTTGGTTCAGCATGTATGTTCCCTGAAAGTCTC  
ACAGCCACCCAACCAAGTTACTTACTCATGGCTAGTAAAAATCACATACTATGTTCAATTC  
AGAGAATTTATTTTTTCCATGTGTATGTACTTAACAATTGTTTGGAAATAAAGTTGGCAT  
TTTATCAGACAT-----CCCTTCTCCTTTTCTCATTATTTGTATGAAGT  
GATTCTTCTAAACATs

>Python bivittatus\_KE956582

TACTGAGAAGAAAGACTGGCCACCTACT-TAAATTTTATTGATCAATTCTGCATCAAATA  
CTTATCAAAATTAACGTCTCTTTCTTGGCAAATCTCTGGAAGTTGAAGAACTTACGCAA  
TCCATACTAGATTGTGGATTCTGGTCTTGAACATTGGGTAGATCACAA-----  
-----  
-----  
-----  
-----  
-----  
-----  
-----  
-----  
-----  
-----

-T



CCCCACAGATACCACTCAAGATACTTCACCCCAATCCCCAGTTGATCCAGGACAAAGCC  
ACACCCGCGGGGTCCCTCTTCTTCCAACCAAATAATAAATAAATCAATTATGGTTAAAT  
TGTAATGATGACACCATGCTCCACTGGGGGCTTGGATTTCAGTATGTATGTTCCAGAGAGT  
CTCACTGCTTCCAACCCAGTAAAATACTCATGGCTTGTACAAATCACATACTATGTTCAA  
TTCAGAGAATTTATTTTTT-CCATGTACACATGCTTAACAATTTATTGGAAAATAAAGTTGG  
CATTTTTATCAGACATGCC-----TGTTTGCTTTCCCTGAT---ATTGT  
TAAACAACATACTTTCCAACATA

>C. tigris\_eSCV2

-----  
-----  
-----  
-----  
-----  
-----  
-----  
-----  
-----  
-----  
-----  
-----  
-----  
-----  
-----  
-----

-----TTCTGTTTTTCTTT--A  
TGTTAGTAATTGCTTCTAGTTGGTCTAGAAAAGAGAAAAGCGAAACA-----

CCACAAACTGGGATAGATGCCAAAACCCAGGATGGTACTCTGATCGTCTGACATTCACT  
CTACAAAAGAGCATGGACTGGAACCCCAACCCAGCACCAACCTGACTGCCAAATATTTA  
TGGGATTACTATAGGATCAGAAAAATGAAAAGTTGAATTTTTTCCCACATTTCTTGGCTCA  
CAAGAAGAATATTCAGAGGAACCACTGTTATTGATCTTGATGGCAACTTACCACAACCTG  
GGAACAACAGCTGCACCAAATGATCCATTT-ACGACAGGTCAACAGCCCACAATTGGATC  
CCCCACAGATACCACTCAAGATACTTCACCCCAACCCAGTTGATCCAGGACAAAGCC  
ACACCCGCGGGGTCCCTCTTCTTCCAACCAAATAATAAATAAATCAATCAATTATGGTTAAAT  
TGTAATGATGACACCATGCTCCACTGGGGGCTTGGATTTCAGTATGTATGTTCCAGAGAGT  
CTCACTGCTTCCAACCCAGTAAAATACTCATGGCTTGTAAAATCACATACTATGTTCAA  
TTCAGAGAATTTATTTTTT-CCATGTACACATGCTTAACAATTTATTAGAAAATAAAGTTGG  
CATTTTTATCAGACATGCC-----TGTTTGCTTTCCCTGAT---ATTGT  
TAAACAACATACTTTCCAACATAATTTTTCAGCACTATCTGGTTCTTTGCTTTGG

>C. triseriatus\_empty site

-----  
-----  
-----  
-----  
-----  
-----  
-----  
-----  
-----  
-----  
-----  
-----  
-----  
-----  
-----

-----TTCATATGGCCTGCA  
TCTGTGACTAAAAGCTGACATACTAAA--CTCTTTTT--ATTTTCCTGGGTTTTTTTT--A  
CGTTAGTAATTGCTTCTAGTTGGTCTAGAAAAGAGAAGAGCGAAACATTCATAACCAATTT  
CTAAACAGAAAATGCC-----

-----  
-----  
-----  
-----  
-----









CATTAGATCAGGTTAGTCAAACCTTGCTACGCCTGTCCTGGACTAGGACACACCCAGTCTT  
GACGAGGGCGAAAGCCACTGACTATAGTCTGACATGTTGGTTCCCAGAACCCTAACACAG  
GACCTGGCTAACTCAAAGGAAAAAGGGCGAGAGTGGATTCTCCATCTCCATGCTGAGA  
AAAGGCGTTCAGGTAAGACAACGCCCTTTCCAGCACAGGAGATGGAGAATCCACCAAT  
GGGACATAACCAAAGCCTCACTGTCCCTGTGGGAGGGAAACAGTCAGGTCCGGTGTCTCGT  
CCCTAGGTACCACCTGTTGGAGGACCCCTCCGGCCAAAGGAGGCATCCGCGGATGCAAACC  
TGTCCAGTTTGTAACTTTACAAAAGGTGAAGCCGCTCTACAAACGTCCCTCAGTGGATG  
CTTGAGTGGCCCATGCCACGGAGGTAGCCGCACTCTGCGTTGAGTGCGCCATGACATGAC  
CTGGAACCAGCAGGGAATGCGACTGGTACGCCCCACAATGCAAGCCCTGATCCATATGC  
CTATCATAGAGGCAGACATCCTCCTTCCCATAGAGGAATGGTGAAGGAGATGAAGAGGG  
CTTCAGACTTGCGGAAGGCCGCGCTCCGCTTGATATAGCAGCGGAGGGCCCTGCGCACAT  
CAAGTGTATGCCACTGCCGTTCCAAGCCATGAGACGGATTAGGACAGAAAATCTGGAAGGA  
TGATTTCTTGAGCCCTATGAAACAAGGTGTTGACCTTGGAACAAGGTAGGGTCCAAGC  
GAAGGACCCTCGGTCTGATGAAAGATGCATAGGTTCATCCCTGATGGAAAGAGCCGCCA  
ACTCAGAGATCCTCCTGGCAGATGTAATTGTCACCAGGAATGCGACCTTGAGAGGCAGGT  
CACCAGTTCTGAGAGGCTCAAAGGCGCCCTGGTGAGGGCCCGTAGGACCTGCGGCAATT  
CCCAAGAGGGATACCTATGAACCACAGGGGGCTTGGTATTGATAGAGCCCTTGATAAAGG  
AGCCTATCAAAGGATGCTGACCTAACGGCATCAGGTTTTACAGGTAAGTATGGTGGAGA  
GAGCCACCACCTGTCTGCGTATGGTATTAGCGCCAAAGCTCCTGTCAAGACCCCTCAGTA  
AGTATTCCAAGATCCTTGGAAATGTCAAATCCGAGATAGTCAAATGGTGTCTTTCGCACC  
AATGNNNNNNNNNNCCAGGCGGTCAATTGAAGCCACTGGGGGTCTGGATGATGCAGGGCC  
CCCTTCTGAGAGAAATGCAACCCGAGGGATCCTCCATGGGGGAGAATTGGAGAGACTCA  
CAAGGTGCGCAAACCACGGCCTCCGTGGCCAATACGGGGCCACGAAAACCCGTGGTCTTG  
GAAGACCCTGATCACCACCTTAGCTCTGACTGGGTGGCCGGGAGGGATGATGACTGGAT  
GAGGATGTCGTCCAGATAGCATTGGACGCGTGTGGCACCAGTCTCAGGTGTGCAGCAAG  
CACTGCCAGTATTTTGGTAAACACCCCTCGGAGCTGACGACAGGCCGAATGAATGGTAGTG  
CCCTGTATTGGTAGTGATGGCTCATATAACAGAACCCTGAGGAACTGCCGGTGGTCGGGGA  
GGATGGGGATGTGGAGATAAGCCTCCGTGAGGTCTATGGACGTCAGGAAGACTCAGTTTC  
TCACGCTGCCAAGATGGACTGGAGCTTCTGCATCTTGAACCTTTCGGTATGCAATGTGGC  
GATTGAGACCCTTGAGGTCCAGAATCACCTCCATCCTCCCGAGGTCTTGGGGTCCACAA  
AGAGGATGGAATAGAATCCCCCGCCCTCTGACCAGCCAGCACCGGTCTATGGCTCTTA  
TGTCTAAAAGATGGCGAATGGCCTCTTGATAAGGCCCTTTTTTACAGGGTTCCTTGATT  
GGGATAAGGCATGAAGCGTCTGGTGGTCTGGACATGAATTCTAGGGACAGGCCATATT  
GGATGGCTTGGAGGACCCAGGAGTTTGTGGTGGTGGTCTCCACTGGTGGCAAAGAGGG  
TCAGTCTGCCACCTATGGGAGGGGTGCCCCGAGGATCACTTGGAACTCTAAAGGGACGG  
CCCCACCCGAAAGGGCCGCTTGCCCTGGGACTGCTGTCTGGATCGGAAGCCCGATCTG  
TCAGGCAGTCCGATCCTGTCTGGCCGTGGTGGGGTGGGAAGGATGGATTGCACCTGTAAC  
GCTCCTGACCGAAAGGACTGTTTGGGGCATATGGGCTGGCCCCGCATGTCAGCGCGCCGC  
CTGAGGTGGGTCAAACCTTCCACTTATCCTTATCTCGATCAAATAAGGTGCTAGGGCC  
TCTCCGAACAGCTGACCGCCCTGGTACGGTGCACAGCCAGACGCCGCTTGGATTTGGTG  
TCAATCTGCCAAGGTTTGGCCACAGTATTCGCCGTGCTGTTACATTGGAGGCCATGTTT  
CTGGATGAAAACCTGGCTGCATGCAGTGTGTCATCAGAGATGTATAACCGCTGCAGCAACT  
AGCTTGCTCAAGTCTTGTGAGTGCCTACCTCCTCCAGAGGGAGCCTGGTCTGCAGTTGA  
CAGAGCCAGAGGAGAGAGGTCTAGTGAAGAAGGATGCACAGGTGCGCGCCCTTATCACC  
CACGCCGCCACCTGGTGAGACCTGTGGAAGGTTAATCCCACCTCTTGTCTCAGCCTTC  
AGAATCTCAGCCATCTCCCCGACACTGTAGTCGAGGAGAAGAGATGGGCCAAGGGTTCA  
TCTACCGTTGGCACCTCCAGCGCTCAGCCAAGTCTGGTGCAGCACTGAACAACCTCTTG  
TCCGTTCCCCCAGGAGGAATGTGCCAGGGAGGCCCACTGCTTCCGAACAGCATTTA  
AGAAGAGAAATGGGCAAGGGACATGGTGTGAGTACCACAGGCTCAAAGACCGGATTTG  
GATCTGAAACTAGGCGAAGGGTCCAACCTGAGGGAGCTGGTTCAGGGCCTATGTTGGCAGTAG  
AGCTGGCCCTTGGGAGCAGCAGCAAGAAGAGAGTTCAGATTAAAGAGGCCCTCCAATGGCA  
GAGGGTCTGGAGTAAGATCCTCCTCCTCCAAACATGGTATATCTGGTTGGCCGGACTCCG  
TAGAAGATGCCCTGCTAGAAGAGGATCGGGATGGTGGGGAGGTCCATGATAATTGGATC  
TCCTGCCTGGAGGGGGTGGGATGGGGAAGAGGAAAGCCACTGACTCGGCCCTGGTCAATGTG  
GTAGGACCTGGCTGCAAGAGCCTGGTCAATTGCCTGGGAAATTATGGCTTGGAGGCGATC

CTCAGAAGGAATATTCTCATGCTCAGCTACCCCTGAGCCCGGCAGCTGTTGGAGTGAAAGT  
GGCCTCTGGGCTGAGTGTGGGATCTGCAGGACCGCTGATGGTTGATGATTATTGGGACC  
TTGATCCCCCCCAGGAGAAGTGTGGTGTGTA AAAATCCCCACTGGTGCCAAACCCCTT  
GGGCAGAGGTTGAGGGTCCCAGCAGGAGATCAAAGAACAAAGCCCCCTGTCTGTTCCGCCT  
CTGCCAGGGCTACCTCTGCGCTTTGGAAAAATCCCTCTCAAAGCCTGGTGCCCTCCTGC  
TGGCCTGTTTCTCTGCCAATTTCAAAGGCTTCTTTACAGAGATGGTCTTAGCCTTGACCT  
TGATCCTGCTTGCCACCTTCTGGTTGGAGGACCTGTGCCTTTTACGGCTAGTGGATGGAA  
GGGTGGTCTCCTTAGGTTGGGGAGCCGTGGATTCCCTCCATCCTGATGTGAGTTATCTCAG  
GTTGTGCTGAGGGGGAACCTCAGGCAGCGGATAAATTGGCGGATTGGACTAATGCAGTTGG  
AGCAGGGGGATACTAGAGTTCTCCCTGCTCCCTGGCCACCTGACCGGTAATTGGCGCAG  
GGGATCCAGTCGTGTCTACGGCCGCGGCAAAAATCAGGTGAGTGATGACAGCCAACCTGCT  
CATAGAGTGACAATGGTGACAAGGCTAGCGAGTTGATAAGTGTGACACTTTTGGCGCG  
CGGGTGGACTCCAAGTGGTGACCGCAGTCCAATGCTTAGCCACTAAATGGTGGCCAGGA  
AGGATAGGGCACCAGAATGAAGCCTGGATTTGGGCCTGTGTTGTGACAGCAGGCCCTGTTG  
GCCTGCTTCACTGCCTAAGGCATGCAATATCTACAGCTTGAGTCGGGATACCCTTGACAG  
TGTGGCATCCAGGGGAAGTGGCCTCTGTGCACCCCTGTGCCCTGATGCCTGGATGGGGATG  
GTTATCTGGGTATGCAGGCCATCCAAGATGGTAGCCGCTACCCTTCCAACTCCTTGTAG  
GATACCCTCCAACTCCTTGTAGGATACCCAGGGGCCGATTAAATCTGAGGGAGAA  
AGAAAGAGGAAAAGGGATTAGCCTGAAGCCTAATGAGAAGGGATATCCCCCTACTCCT  
GTTGCCTCCGTTAAACTCCGGCCGCGGTGGCCGTGTGGTCCAAAATGGCGGCCGCGCCTA  
CCGGAGGATGCAACAGCCATCAGGAAGCAAAGAGATAGTCGCTGTAGCAATTCCAGGCG  
ACCGGAGAGAGAAGCCGAGTGTGAGTGAGTTTAGATGGGTGGCTGCGCCGACGAATCT  
GGCCGATTAGGTTGCAGCGGGCCACCACGCAGCTTCCAAGATGGCGGCCGCAAGCTCCGG  
CCGCAAGAGAAAAGGCCCTGAGGTCTCTGAGGAAAGGCACGAGACGGCTAGCAGAGACC  
TCTGCAAAATAGCTAGGAGCTGAGGGAAAGGGTTCCCGCTCGCAGTGCTGATCCCAATGCCG  
TCAATTGCGAGGCGAAGGAGAGCGGAAGCTTCCGCTCTCCCTGAGGCTTGGAAAGAAGCC  
AAAACCTCCGACGAGAAGGAAGAAAAGTGA AATTTGGAGCCTCTGTGGAGGCCAGAAGCTGA  
GGCATGGGGTTTCCCAACTGCGGCGCTGATCCAGCGCCGCAAAAGGCAAGGAGGAGGA  
GAATGGAAGCCTCTGCTCTCTCTGAGGCTTGGAAAGGAGCCAAAAACCTCCGGCAGTCAA  
ACTGGAGTAGCGTGATCCCAGCGCTACTCAGGTGACTGTAACAGCAATTAGGAAAGAAG  
GAGAATTCATAAAAGATTTGATCTACCCGCC TAAACTGGGAGCCAAGTTGCCACACCCA  
TCTGGGCTGGAGATCAGGTCAAGACTGGGTGTGTCCTAGTCCAGAACAGGCGTGGCAAGT  
TTGACTAACCTGATCTGATGGGCATGAAGACAGAGCACAGATTCTCCATCTCCTGTGCTG  
GAGAAGACAAAATATTACTCTGGCTTACTGCAGCTTTTCTTTTCTAGCATTAGCTGGTCTT  
ACTGTGTGAAGACATAACATTACCCTTCAGTGGACAATCTGGGATCTAGATCTCCCAAACA  
GATAGAACCAGAGTTTCCATTTCCATTACAACCTCAGTAATCCCCCTTCCATTCCCAGA  
TACTTTGTCAACATTTTCATATAGAAGAACCCTCAGTTTGAACCAAACCAGTGAGTTATCT  
ATAAGGGTAAACAATATCAGTATGGACTATAAAAATCATAACATAATATGATCTGGTATAG  
GAGTAGAAAACCTGTACTATCAAAAAACCATTTATACAATAAATGGAGGAAAGCACTCA  
TAACACCAATTGTTAGAAATCTTAAATTTGCTTTTCTGACCAGGAAGTTATCATTTTTTCTC  
ATGCACAATAAGTATTTAGGTATTTGCAGTAAGTTTCTAAGTTTAAACATTTCAAATGT  
GGAATTCGCTCTGGTACCTACTTTACACGACTAATTGTTTCAGAATTTTCTGTACAAATAC  
GGTTTTGTTATTTTATATCGCTTTATGTTTGATGTCTTGTAATACTCTCTCTTTTAAAT  
GTTGGTCAGATATATTTTTTCCAATTATTTTATTCTATATTGGTATTA AAAATAAAAATGC  
TGATTAGATACAATAGTGCATAAAAAGTTGAGAATCCCAATGAATTTTCAATATTTAGCT  
CTAAATATAACCTAAAATGTCCGGGTTTTTCCACACAAGTCTAAAACCTAGATAAAGAGA  
AGCCAATTAACAAAATAAATCAGAATATTA TACTTGTCCATTTATTTACTGAGAAAAATG  
ATCCAAAGCTATATAGATGTGCGTAGCAAAAATATTTATCTAATTTTAGGATTTTTTGTGG  
AGAAGGGGCGTTGTCTTANNNNNNNNNNNNNNNNNNNCAGTACGGAGATGGAGAATCCACCAA  
AGGGTTTTCTCTGCTGCCTGCTCTTGAGACCAAGTAGCCAAAATTGACACGCCCCCTCTT  
GCTAGGA

>C. triseriatus\_eSCV3

-----  
-----  
-----

~~~~~  
~~~~~GACAGT TACTGTATTTTCCGGCGTATAAGA  
CGACTTTCTAAACCATGCAAATCTTCTACGATCAACTGCCACAACCTGGATACTCTCAAG  
ATACCACTCAAGATACTTCACTCCCAAACCTCCAGATGATTAATGATACAGCCACCCCGT  
CACCCCGGGCTCAGTCTTCTTCCAGCCAAACAGCAAATACAACCAACTCTGGCTCAACTG  
CAATGATGACCAAATTTCTCCACTGGGGTCTTGGTTTCAGTGTGTATGTCCCAGAAAGTAC  
TATAACAAGAACCTGTACCTTTCTGATTCTATAGTAATCCAGATGTATTTGGGTGTAATG  
TTTGTGTGTGTGGGGTTCCAGTCCATGCTCTTTGAAGTGTGAAAGTAATCCTGTCAGAG  
TACCATCCAGGTGCTTTAGCATTGGATTGTGGTAGCATATAAACTCTTAAGTTATTGACC  
AATCTCAGGTTAGTAATTCATTTTTTCTTCTCCATCTGTATCTGTGTCTCCTCCTTCTT  
TGTCTTTTCCCTTCCCTTCTTGTGTTTTGCCCCACCTCCTGTGGAAGGATTGGCC--ACCA  
AACCCCAACCGAAATGAAGGCATCTGAAAATGAGGAAGTAACAAGCTATAAGAAGTGCC  
TGCTTAGTCTTGCCAGGAACCTCAGCACACATCAGCACACTTCCCTGTTTTGTGACTACAC  
TTGATCCCTGCGACAGAAAACATGCAACTGGCTGGA~~~~~CATCCC  
TGCAAAAAGATATGTATTTACTATTAACAATCCCTCCGAAGAAGATTATGATGCTGTTAAG  
GACTTTATCACTCCGAAAACCTGCGTTTATGCTATAGTTGGTGAAGAACAAGTCTCAACC  
CTCCACTTGCAAGGATTTGTCAACTTAAAGAAGAAGATGAGATTCAATCCCTTCAAAGCA  
GCTATTGGTGGAAAGAGCTCATGTGGAGAAAAGCTAAACGAACTGATCTGGATAACAAGAGA  
TATTGCAGTAAGCAGAAAAGTTTACCTTGAGGTTGGAGAGCCCTCCGCA---CAAGGAAAG  
AGGTTAGACCTGAAGGAAGCTATTGCTCTGCTGAACAGCGGTTCCCTCAATGACTGAACTT  
GCCAGGCATATCCCTCCGTATATATAAGATATGGGAGGGGCCTGAAAGACTACGTCATC  
ACTGCACAATTTGGCTAGGATAAGAGATTTCAAACCTGATGTACATGTGATCACAGGAATT  
CCGGGGTGTGGCAAGAGTAAGTTCTGTAGCGAACTGGATGGTGACAAAATATTGGAAACCC  
CGTGGAAAAGTGGTGGGACGGGTATAACAGGGCAAGAGATTGTTATATTGGATGATTTTTAT  
GGGTGGCTACCATTTGATGAATTTGTTAAGAATTTGTGAAAGATTCCCTTATAGAGTTGAG  
ACCAAGGGTGGTACAATGGAATTTGTTTCTAAGTGTATTTATATCACTTCAA--CAAGCC  
~~~~~

~~~~~TGTGAAAGA~~~~~CTGATGAAGACATACAC

>C. aquilus\_eSCV3

~~~~~  
~~~~~  
~~~~~  
~~~~~  
~~~~~  
~~~~~  
~~~~~  
~~~~~  
~~~~~CTCAAGATACTTCACTCCCAAACCTCCAGATGATTAATGATACAGCCACCCCGC  
CCCC--GGGCTCAGTCTTCTTCCAGCCAAACAGCAAATACAACCAACTCTGGCTCAACTG  
CAATGATGACCAAATTTCTCCACTGGGGTCTTGGTTTCAGTGTGTATGTCCCAGAAAGTAC  
TATAACAAGAACCTGTA--~~~~~ATCTATAGTAATCCAGATGTATTTGGGTGTAATG  
TTTGTGTGTGTGGGGTTCCAGTCCATGCTCTTTGAAGTGTGAAAGTAATCCTGTCAGAG  
TACCATCCAGGTGCTTTAGCATTGGATTGTGGTAGCATATAAACTCTTAAGTTATTGACC  
AATCTCAGGTTAGTAATTCATTTTTTCTTCTCCATCTGTATCTGTGTCTCCTCCTTCTT  
TGTCTTTTCCCTTCCCTTCTTGTGTTTTGCCCCACCTCCTGTGGAAGGATTGGCC--ACCA  
AACCCCAACCGAAATGAAGGCATCTGAAAATGAGGAAGTAACAAGCTATAAGAAGTGCC  
TGCTTAGTATTACCAGGCACTTCCAGCACACATCAGCACACTTCCCTGTTTTGTGACTACAC  
TTGATCCCTGCGATAGAAAACATGCAACTGGCTGGA~~~~~CATCCC  
TGCAAAAAGATATGTATTTACTATTAACAATCCCTCCGAAGAAGATTATGATGCTGTTAAG  
GACTTTATCACTCCGAAAACCTGCGTTTATGCTATAGTTGGTGAAGAACAAGTCTCAACC  
CTCCACTTGCAAGGATTTGTCAACCTAAAGAAGA---TGAGATTCAATCCCTTCAAAGAA  
GCTATTGGTGGAAAGAGCTCATGTGGAGAAAAGCTAAAGGAACTGATCTGGATAACAAGAGA  
TATTGCAGTAAGCAGAAAAGTTTACCTTGAGGTTGGAGAGCCCTCCGCA--TAAAGGAAAG  
AGGTTAGACCTGAAGGAAGCTATTGCTCTGCTGAACAGCGGTTCCCTCAATGACTGAACTT  
GCCAGGCATATCCCTCCGTATTTATAAGATATGGGAGGGGCCTGAAAGACTATGTCATC  
ACTGCACAATTTGGCTAGGATGAGAGATTTCAAACCTGATGTACATGTGATCACAGGAATT



TGCAAAAGATATGTATTTACTATTAACAATCCCTCCGAAGAAGATTATGATGCTGTTAAG  
GACTTTATCACTCCGGAAAAGTGCCTTTATGCTATAGTTGGTGAAGAACAAGTCTCAACC  
CTCCACTTGCAAGGATTTGTCAACCTAAAGAAGAAGATGAGATTCAATCCCTTCAAAGCA  
GCTATTGGTGGAAAGAGCTCATGTGGAGAAAAGCTAAAGGAACTGATCTGGATAACAAGAGA  
TATTGCAGTAAGCAGAAAAGTTTACCTTGAGGTTGGAGAGCCCTCCGCA~~~CAAGGAAAG  
AGGTTAGACCTGAAGGAAGCTATTGCTCTGCTGAACAGCGGTTCCCTCAATGACTGAACTT  
GCCCAGGCATATCCCTCCGTATATATAAGATATGGGAGGGGCCTGAAAGACTACGTCATC  
ACTGCACAATTGGCTAGGATGAGAGATTTCAAACTGATGTACATGTGATCACAGGAATT  
CCAGGGTGTGGCAAGAGTAAGTTCTGTAGTGAACCTGGATGGTGACAAATATTGGAAACCC  
CGTGGAAAAGTGGTGGGACGGGTATACAGGGCAAGAGATTGTTATATTGGATGATTTTTAT  
GGGTGGCTACCATTTGATGAATTGTTAAGAATTTGTGATAGATACCTTATAGACTTGAG  
A

Supplemental Dataset 9

```
>Crotalus_mitchellii_eSCV4_contig_24347
--ATGCTTTGTGACCTGCTATGTATAATTTAAGATCCTGGTTATTATCTATAAAGCTCAA
TGTGGCATATAGCCTAGCTATATGCCACATTGTTTCTGCCCCTTGAAGCTTGCTTTGGA-
-TCCCATCAATCAAATAATATGATCTACTGGGATCCAGGAGTGGTCCCTTCTGAGCCACCA
ACCCTGATCC-----AGATTCCCCCTGGAGAT-AGTAGAGCCTCAACTACCTACTTTC
AAGTGAGCTCTAAAAATTTGCCCTTTTTTGCCCCAGGATGTAGGTTTAGACTGCA-----
-----CAAGAAAAGAGGTGAGACCTGAAGGAAGCTATTGCTCTGCTGAACAGC
GGTTCCCTCAATGACTGAGCTTGCCCGGGCATATCCCTCTGTATATATAAGATATGGGATG
GGCCTGATAGACTACGTCATCACTGCACAATTGGCTAAGATGAGAGATTTCAAACCTGAT
GTACATGTGATCACAGGAATTCCGGGGTGTGGCAAGAGTAAGTTTTGTAGTGAACCTGGAT
GGTGACAAAATACTGGAAACCCCATGGAAAGTGGTGGGATGGGTATACTGGACAAGAGATT
GTTATATTGGATGATTTTTATGGATGGATACCATTTGATGAATTGTTAAGAATTTGTGAT
AGATACTCTTACAGAGTTGAGACGAAGGGTGGTACAATGGAATTTGTTTCTAAGAGTATT
-----TAGAGTAAGGTGGAT
ATGTGGCATATGTTTTATTTGGGGCACTTCTTGGAAATTGTTTTAAGAAACCTGAGAGAA
GTGTTTATGTTGTCCTCTTTAATTTCTAACCCCTACCTTAAGCACTAAATCAGGTGGGTG
ACCTTGGGCTAGTCACTCTTTCTCAACCCCTAGAAAAGAAAACAATGGCAAACCATTTCCAA
AATGTTGCCAAGAAAACACTACAGGGACTTGTTCATGTTGAGTCATCGCTGACTCAAAGGG
ACATAATAAGTGAGTAAGTAAGTTCACCTTTTAGCTATCATTACTCTGAAAAAGCTACA
ATAGAAAAA-GTAATT-TTATCCAGCAATGACATAAAAACAGTTCCTTATATTGTCTCTTA
CCCAAATTTTAACTTTTTCTCTAAAACAGCCTCTCTGTTCTCTTCAGTCTATCTTGGCA
TTGCTATTGATATACATCTTGAACATTAAGCACAGAAAATGTAGTCAAAAATAATGTTAA
TGGTAACAGTTGAATTTTTTTTTATTTTCATGGACCTTCAAACCTGTTCTTGTGCTCTATCA
GTAGGACTATATACCAATGATAAAAACAATTTGACCACACCTAAAAATAAGAATAACTGCAA
CATCAAATCTTTAATTTTCAGTAGGGTGACAAAAGTGAAAAACAAATGTTCTCTGAATTTGTA
CATTGTATAAGATCAGAAGTATGTTCTGAACTAAGCAAGGTGAGGAACTTCTGGAGCATA
TCCAGAAGTATTCCTCTGACCTTTCTGTTATAATCCACCAGAACATTTGACCTAGTGGTC
TGAATTAAC TGCCATCCTTTATTTTGTGCGTCATCTCTCTTTCAATTTAGTGGGACA
TTTTCATTTCTTCTTCTGACAGAGCAGGCTATATGAAATTGAATGATTGCTTTGTGCTTTA
CACAATTTCAATTTGAGTAACAAGAAATCTTAGTAGCCACACAATCTTGCTCAAGCCAAGA
TTTCAATTACAGTTCTGGAAAAGCAGAACAAGTAGGACAAAATTTCCAGGATT
>C. atrox_eSCV4
-----
-----
-----AGGAGTGGTCCCTTCTGAGCCACCA
ACCCTGATCC-----AGATTCCCCCTGGAGAT-AGTAGAGCCTCAACTACCTACTTTC
AAGTGAGCTCTAAAAATTTGCCCTTTTTTGCCCCAGGATGTAGGTTTAGACTGCA-----
-----CAAGAAAAGAGGTGAGACCTGAAGGAAGCTATTGCTCTGCTGAACAGC
GGTTCCCTCAATGACTGAGCTTGCCCGGGCATATCCCTCTGTATATATAAGATATGGGATG
GGCCTGAAAAGACTACGTCATCACTGCGCAATTGGCTAAGATGAGAGATTTCAAACCTGAT
GTACATGTGATCACAGGAATTCCGGG-TGTGGCAAGAGTAAGTTTTGTAGTGAACCTGGAT
GGTGACAAAATATTGAAACCCCGTGGAAAGTGGTGGGATGGGTATACTGGACAAGAGATT
GTTATATTGGATGATTTTTATGGATGGATGCCATTTGATGAATTGTTAAGAATTTGTGAT
AGATACTCTTACAGATTTGAGACGAAGGGTGGTACAATGGAATTTGTTTCTAAGAGTATT
-----TAGAGTAAGGTGGAT
ATGTGGCATATGTTTTATTTGGGGCACTTCTTGGAAATTGTTTTAAGAAACCTGAGAGAA
GTGTTTATGTTGTCCTCTTTAATTTCTAACCCCTACCTTAAGCACTAAATCAGCTG
>C. tigris_eSCV4
-----
-----
-----CCTTCTGAGCCACCA
ACCCTGATCC-----AGATTCCCCCTGGAGAT-AGTAGAGCCTCAACTACCTACTTTC
AAGTGAGCTCTAAAAATTTGCCCTTTTTTGCCCCAGGATGTAGGTTTAGACTGCA-----
-----CAAGAAAAGAGGTGAGACCTGAAGGAAGCTATTGCTCTGCTGAACAGC
GGTTCCCTCAATGACTGAGCTTGCCCGGGCATATCCCTCTGTATATATAAGATATGGGATG
```







Supplemental Dataset 10

>Crotalus\_mitchellii\_eSCV5\_contig\_193549  
TTAGGAAGGTTGAAAACCACTGATCTACATGATATCCCCAACCATCCCTAATCTATTGCA  
CAATTGACT-----AAGATGAGAGATTTTAAAACGGAAGTCCACGTCATCATGGGAATC  
CCCAGGTGTGGCAAGAGTAAGTTTTGTAATGAACTTGAAGGAGAGAAGTACTGGAAACCG  
CGGGGAAAGTGGTGGGATGGATACACTGGACAAGAGATTGTGATATTGGATGATTATTAT  
GGTTGGCTCCCCTTTGATGAATTGTTAAGATTGTGTGATAGATATCCCTACAGAGTGGAG  
ACTAAAGGGGGAAGTGTGAGTTTTGTGCTAAGACCATTTATATCACTTCAAACAAACCT  
GTTAAGGAATGGTATAATGAGGAATATTGTCTTGAGGCTTTGTTTAGAAGAATCACTTCA  
TACAAAATAATGAGAAAAGGAGAAGGCATGTCTGATAAAAATTCCA-----  
-----ACTTTATTTCCAATAAAATTGTTAAGCATGTGTACATGGAAAAATAAAT  
TCTCTGAATTGAACATAGTATGTTATCTT-----ATGAGTACTTTACTGGTTGGGAA  
GCACTGAGACTTTCTGGGATATACATTCTTCTGCTCAGTTTTTCTAAACCCAAATTCTC  
TAAATTCTTTGTAGTACCAATCACAGGCCACAAATTTCCAAAATTCTTTCCTGAAGAGT  
GGCCCTTCTGAGGTGTGATCAACTAGATCATCTTTCAATTCTGTGATAAGAATCATTGA  
GTTTCATGTTTTCTATTCTACCAACTTTCTCTCAGCTTTGCAAGTCCCTGCTTTGTTTCC  
ATTCTATACAGAGTTAATTCACCACA--TTGCTACAGTGGCAATCTGCTATCCCATTCTTC  
CAGAATCTATATATTGATCTTGTCTCTTCTCCCATCCTTTTCTTTCAAACCTGGTTA  
TAAAGCACTAAGTGGGTTCCAAAGACTCGGTTTTCTTTAATTCAAAGGCCCTGTGTTGCAT  
TTATAGCAGACAAACAAATTAACCTGCCTGTGATGACAGGGAGGCTGAGAATAAGAGGGGA  
ATCTCTAGTTTTATCTTCTTTCTACGGAAGGAGTGGCTAGGTGGGCACATACAATTGCTA  
ACATAATAGCAATTTTATATAGACGGATCATCTGTAT

>C. atrox\_eSCV5  
-----CA-CCCTAATCTATTGCA  
CAATTGGCT-----AAGATGAGAGATTTTAAAACGGAAGTCCACGTCATCATGGGAATC  
CCCGGGTGTGGCAAGAGTAAGTTTTGTAATGAACTTGAAGGAGAGAAGTACTGGAAACCA  
CGGGGAAAGTGGTGGGATGGATACACTGGACAAGAGATTGTGATATTGGATGATTATTAT  
GGTTGGCTCCCCTTTGATGAATTGTTAAGATTGTGTGATAGATATCCCTACAGAGTGGAG  
ACTAAAGGGGGAAGTGTGAGTTTTGTGCTAAGACCATTTATATCACTTCAAACAAACCT  
GTTAAGGAATGGTATAATGAGGAATATTGTCTTGAGGCTTTGTTTAGAAGAATCACTTCA  
TACAAAATAATGAGAAAAGGAGAAGGCATGTCTGATAAAAATTCCA-----  
-----ACTTTATTTCCAATAAAATTGTTAAGCATGTGTACATGGAAAAATGAAT  
TCTCTGAATTGAACATAGTATGTTATCTTTACTAACCATGAGTACTTTACTGGTTGGGAA  
GCACTGAGACTTTCTGGGATATACATTCTTCTGCTCAGTTTTTCTAAACCCAAATTCTC  
TAAATTCTTTGTAGTACCAATCACAGGCCACAAATTTCCAAAATTCTTTCCTGAAGAGT  
G

>C. tigris\_eSCV5  
-----CCCCAACCATCCCTAATCTATTGCA  
CAATTGGCT-----AAGATGAGAGATTTTAAAACGGAAGTCCACGTCATCATGGGAATC  
CCCAGGTGTGGCAAGAGTAAGTTTTGTAATGAACTTGAAGGAGAGAAGTACTGGAAACCG  
CGGGGAAAGTGGTGGGATGGATACACTGGACAAGAGATTGTGATATTGGATGATTATTAT  
GGTTGGCTCCCCTTTGATGAATTGTTAAGATTGTGTGATAGATATCCCTACAGAGTGGAG  
ACTAAAGGGGGAAGTGTGAGTTTTGTGCTAAGACCATTTATATCACTTCAAACAAACCT  
GTTAAGGAATGGTATAATGAGGAATATTGTCTTGAGGCTTTGTTTAGAAGAATCACTTCA  
TACAAAATAATGAGAAAAGGAGAAGACATGTCTGATAAAAATTCCA-----  
-----ACTTTATTTCCAATAAAATTGTTAAGCATGTGTACATGGAAAAATAAAT  
TCTCTGAATTGAACATAGTATGTTATCTTTACTAACCATGAGTACTTTACTGGTTGGGAA  
GCACTGAGACTTTCTGGGATATACATTCTTCTGCTCAGTTTTTCTAAACCCAAATTCTC  
TAAATTCTTTGTAGTACCAATCACAGGCCACAAATTTCCAAAATTCTTTCCTGAAGA  
>Ophiophagus\_hannah\_empty\_site\_10396  
-----  
-----  
-----  
-----  
-----  
-----

-----  
-----  
-----  
-----  
-----TTCTTCTGCTCACTTTTTCTAAATCCAAATGCTC  
TAAATTCTTTGTGGTACCGATCATAGATCAAAAGGTT-CAAAATTTCTTTTCTGAAGGGA  
GGCCCTTCTGAAGTGTGATCAGCTGGGTCATCTTTCAATTCTGTGGTAAGACTCATTGA  
GCTCATGTTTTCTAATTTACCAACTTTCTCTCCAGCTTTGCAAATCCTTGCTTTGTTTCC  
ATCCTATACAGGATTAATTCACCACACTTGCTACAGTAGCAATCTGCTACCCCATTCCTC  
CAGAATCTATATATTGATTTTGCTTTTCCTTCCTATACTTTTCCTTTCAAACACTGGTTA  
TAAACGC-C-A-GTT-CCAAA-ACT--GAACTACTTTAATTCAAAGGGCCTGTGTTGCAT  
TTATAGCAGACAAGCAAATGAACTGCCTGTGATGGCAGGGAGCCTGAGAAATAAGAGGGGA  
ATTTCTAGTTTTAGCTTCTTTCTATGGAAGGAGTGGCTAGGTGGACAGATATAATTGGTA  
ATACAATAGCAATT--ATATAGACAGATCATCTATAT

Supplemental Dataset 11

>Crotalus\_mitchellii\_eSHBV1  
CATGCCCTCTAATAAAAAACCCATTGTCTAGGCAGAAATATCAGGTATGATTTTTCAAGC  
TGATAGTAAGAATTGGATAATAATAACTTCTGGAAAATATTAATAGCATTT-----  
--AGAGCTGTCCATTCTTTTTAATTATTTTGTAAAAGTAGCCT-GTATAAGCAGCCCA  
CC-AAGATTTATACAAGTACATTTAACCTGATGTGATGATGGAAAATGACACCTCAATAT  
GATTATGAACAAAGTAGATCCAGAGCTTTTAAAACATAGCCTAAAGGAGAACAAATATTT  
ATTTTAGATTTGTTCTCTGGCTGAGTCTAAATAAAATAGAATGGAAAAAATAGTGAA  
AAAAGTGCATGGGATACTCATTGAGATAAGA-----AACATTTGTTTATATGTAACACC  
AAAAGAAACGTTTTTTTTCTAAAATTTAAATAGTAAAAAAATATTTGTACTGATTTCTAGT  
TAGTTGAAGATTG--CAGGAAAGAAAAGAAAAGAAAAGAA-----AAGAAG  
GA-----AACTACTTAAGTATTATACCATTTCAATA  
ACAGTTTGCCC----GGATCAAATAAAATATACTTTGCCATAGCTTATAAAAAGGATCTTTT  
CTAATTTAGCTATTTCCATTAATGTCTGAGTCTACTGATCAATAATAAGCATTGCTTCGT  
TTCCGTGTTCAATAAGAATCATCTCCTTGGCAGCTGCAGCTTCATTTTTGCAAAGTAGCTT  
TCAATGAAATAAAAAACAAAAGAAAAAACAAGAAAAAAAACCA-----CATGCAG  
GTTCAATAAGGAAGTTATAAACATGCTCAGAGGTAGATTAATTTAATTATTTTGCTTTAT  
TGAGCCAAAATACTAAAACCACAGAATCATTTATACTGGAATGCTGGAATGGCGGAATAA  
ATTTTAGATATATCAGGACTTGAAAATGTGATGGCAATTGTTGTTGATAGTGAAAAACAG  
CAT-CTTGCAATGTCTAGAACAAGTTGATGGATTTTATCTAGGAGGTACAGGAGATAAAA  
G-----  
-----  
-----CCTACTAC  
AAGAGCCTGTCCAGAATTCTCCCTCCGATCATGTCTCGCATCTCCTTGGACTTCTCTGAG  
GCTT--TTAATCATCTTCCTCATCATCCTG-AATCTGCCGCTCACTTTCTTA----TAT  
CTGATGGGACACACGCTTATGGGTTTAGGAAA-----  
-----TGTCCTAACACCATCGCAGACCATATTCATTGCAGATGCAACTTAT  
TCTGCTTTGCTTATATGGATGACTTCATCAGCTCTCATCCAAACCGTAAGTACCTTGCTG  
CCATTAGCCATAGTTGCATTGAGTGTCTCAAACCTACAGAATCCGGATAAATTATGATA  
A-ATTATGCCTGAACCTGTACAAGACATTCATTACATTGGCTATTGAATTACTGACAGGA  
-----  
-----  
-----  
-----  
-----CTCTAGGTATTCCCT  
AAAGAACATCAAGAAAAATGTATCAACATTCTAAAAGAAATTGATTGTAAAAAATGGTAT  
GATTGGAAAACAATAGCACATTTTATTGGGCATTTAAGCTTTCTTGCTGGTTTTTCTTCC  
TTTCAATGGTCTTTTTCTAATCACTCTATATGCTATATGTAATAAGTCCGATGTACAATTT  
TCCAAATGGTATAAACAGTTATTGTTAAAACCTGTTAAAAC--GTTGATCCATGGAACTA  
TTGTTGATTTAAGAACATCAATAAT-GTCATAATGAAATTCAAAACAATCTAGACCAATC  
CATGGACAAGAACTATTT-----CTGTTATTTCATTATCAACTTTGTGCTGTAT  
TTTGTGATAGTATGTTTGTGTGCACAAATGCTTTGATCATTACCATGGATGTTTTTCA  
TGTTATGTACTTTGTACGTGGCATAAAACAAAACCTTGTGCTACATGGCATCAGAAGACAAC  
CCTGCTGATCTTCCCGCCTTTTGGCATCTAAGGTCAAAGACACTGCTGTACCCCTCCTTA  
TTAAGCCTTGGGTGCCAAGCTCTCTTAG-----ATTTATACCCCTCCTCTT  
TGGAGCAATTCAGACTGTATTCTCTATGTCCATAGGCTTGCTATGGCTTTGCTTTACTAT  
TCTGTAAAGTACCTTTATGATTAAGTGATTAAGCGTGATTCTCTCTTCAATGTAATGTCA  
CTCAGTAAAACCTACTGGGAGAACATGCATATGAAACATGCAAGTTCATGCCTGATGGTTTC  
TTTCCCTCTCTTCTTGATAACATTCAGATGGCATGGAATGTATTGCATGATTCAGTT  
ACATCTGATAAGGGAGAATTAATTGAGAAACATCGGATAGCAGCTGCCCAATCCTATTGG  
GAATTGTGGTTGCTTGCCCTTTAGTTGCTTTTTTAACAATTATAGTGGATAACAATATA  
GATAACCAATTGCAGATAATTGATCAGCATCTACCAGGGCTCCAAGTCGTATGTCTTAT  
TATGGCACTGAGGCTGATCAATTAGCTTCTAATCCATCACTATCCCTCATTATTCAACT  
GCTAATGGAGCTCAAATAAGTGATCAGCCTCCAGCCAAAGATAATTTGGCTCCAATTAA  
GAGTATCTCTACTCCTGAGAGCCCCGATCCCTTTGCTGAGTACCCACACCCGAGTGAGTC



GATATAATAATAATTATTGAT-----CTTTTTTAAAAAATCAGATGTTTGCACCATC  
AAAGTTACATTCCCACCCTGTTAATAGCAGCTGGAGTGAGTTTGCTCTTATTAGTTATA  
TTCTACAGTTGAATTGATTCCAGAAGAAATGTATTATGAGGACATCCAGACATCAGCCT  
TATTTTTAATGCAAGTGCTTTAAGAACCAGTGATCCTCACCAGTTTCATTAGTGGCTTTG  
GTCCAGTTTTAATTAGGTGATGATCTGTATATTATAGTGTGCTTAATAAGAGGGTAATGG  
TGATTATATGGATACTGCTGTTTTTCGTCAAATATTATGCTTATGATGTTCTTCATTAAGC  
ACTGGACTTTTCCGGGTCACCTCCATTTAAGTGGGAAAGTAGGTAAGAATGTTAAAGTT  
CATTGAAAAAAGATCATTGTAGCAGCAATCCTCCGAGCATTATGACCTACAGCTCCAAC  
CTGCCTTTTTTTTTCTTTGTGTGTCAGTTGGATACCCAAATTTCTCCCTGTAATTAAGTGA  
GACCAAGGGCCACTAAAATGGCAGGTGATAGCCCTGGGCTGCAGATTACTGGCATATGC  
ATGGCCTTGAAAAGATTAGAAGACCAGTAAAA--TCATTTCCGGTGTGTACGCTGTGAGAC  
TAAAATGTGGTGGACAGAGAAAAGACAAATGGAAGTTCAGAGCAAAGAGGATAGAAGATT  
TGGTGGCTTTAATCAAGAGATCTTTAAAATACAGATTTAACCATATAACAGCCAGTGAAGG  
AATGAATTAACAAAAGAATTACTGGAGTGGATTAAGTAGTAACCAAGATAGCATCCCC  
TGAATAATCCATAATCACCTCCCATTTAAAAAAAAGCATAGGAAAGTTATCAAAGTTAG  
CAGAAGTGTCTTACTCAGAACAAAATGCCATTCATTTAATATTGGTTGATTTTAAAGCA  
TTAGGTTTGTCTAGTTTGCATTCAAATGGGAAATCCCTAAAAAGTTATCTACAGAACAGA  
AAAATCACCTAGAAGAAGGAAATGGCAAAATTTATGGGATATCTCCAAGAAGGACTCCTTA  
CCTTTTCAAAGC-----

-----  
-----  
-----  
-----  
-----  
-----  
-----  
-----

-----ACCTAAATGGACATAATTAT  
TTTGAGTAATTCATAGTTTATTTTATTTAATTGATTGTT--CCCTCACCATGTTTTAAT  
TTTTGAAAGCCACTCAGAATCATATCATTAAGT--TATAGATAGGTACCTATGTAAAGTAT  
ATTAATTAATATTTCTCAACTTTCTTGTAGGAGCTTAGGATAACTATATGTAACACTAGC  
TCATCAAATTCCTCCCTCGGAACAGCATCCTGTGAAATTGGTTAAACTGAGCTTCGGTGG  
ATGACCCCTGTCCCTAGACAAACAGATTAGTGTATTATACATATTAATCTCTTATATATGGC  
TTCAGTGAATATGTTAACCATTGTAAGACCATGTATTTCATTGGCTAAAAAGCAAAGGCTA  
GAAAAGTGAAGTACTGTATATATAGATTATGCAATTTATTTTAAATGGATCTCAGGAAATTC  
ATAAGTGCCATATTTAATTGAAAAACAATTAGATTATTTTATTTATTGGAAATGAATACA  
TAAAGTGAAGTGTAGCAGATGAAGCCCTACAGAAAGATTGGACTAAGACTAGAAAGAC  
TGGAGAATAACGGGTTTTTTACTACATATTAGGCAAGATTAAGAATTCAGGAAGAATAGA  
AATAAAAAGGATATGTAATTAAGAAAAAGAACATAGAAAAGTGAAGCAAAACCAAAATAAA  
AATAGCAGCAGAATACACTTGAATCTCTTGCTCAGTTAAAACAATGATTTGACTGAACCC  
CCAAATCTATTTTCTGAATTAGATTCAATCATTCATAATTCAACCATTTTTTTTTAAAAA  
ATACAAAATTAACTTTCAAATTCATCAATATAGTTAACCAAAATAACAATTCATATCAG  
ATATTTCTCTATCTTTAACAAAAGTGCACCATCTAAATTAGTAAAAACAAGTAAAGAGAT  
GCAGGATTAGTAAAACAAGTAAAGAGGCACAGGATTCGGATTTGACATGGGCAGATCCTA  
TACATATAAAGCCACGCCTTTTCTAGGGCTCACACAGTATCCATGCAAGTTCAGGAAAAG  
ATGCATTTGAGTTAAGGAAGCATTAAGAAGAGGTTGACTAGATGGAGCATGTGTTGCTGT  
CCTTTCTTTACCAACTTAAATTCCTTCTTAATACAGACATGCATGTCCCTGAGCCCACATG  
CATGGGGTGAAAGCTCAGGAAAAGATATGGCTAATTTAACAAGCAGACAACAAGAACATA  
AGAGTGGCCAACGCCAAATCCAAAATACCTTACCCTGCTTTGATTCCAAATACTGCACAC  
CAGTGAAAAGCTGAGGATTAGAAATGTAAAAGTTAGAATCATTTTTCAGATTAAGTAATA  
GAAAGCATAAGTAATTTTTAAAATGACTATGCAAGCCCATAGTCTTCTAAATTCATTTTCA  
CAGGTCAATTTACAGATAAAAGCCTGGAAAACCACCAGGACCAACTCCTTCTTGCTTGA  
AAGTTTGTGCTGATCATTGGACCCAATCTTCAACCACATCTGTAATAAATCACTAGAGA  
TGTGTTATGTTCTTCTTGCTTCAAATGCTCTACTATCATCCCAGTGCCTAAGAAATCCT  
CCATTAAGGAGCTCTATGACTACAGACCCGGATGCTCTGAGATCCGTAATTATGAAAACCT  
TTGAAAGGCTAGTGCTGGCCACCTGAAAATCATCACGGATCTGCTGTTAGACCCCTTGC

AATTTGCCTATTGAGCAAATAGATTGGCAGATGATGCTGTTAATATAGCATTGCACTACA  
TCTTACAGCATCTTGAATCTCCAAGGTCCTATACAACAGTCCTTTTTGTAGATTTGAGCT  
CGGCATTCAATACCATCATTTCAGATATCTTCTCACTAACTAACTCAGCTAGCTGGGC  
CTGACCACACTTGTAAGTGGATCTTAAGCTTCTAACAGATAGGAAGTAGCAGGTGAAGC  
TAAGAAAATCACATCAGATACCTGTACAATTATCACAGGTTCCCCCCCCAAAGCTGTGT  
GCTCTCTCCATTACTCTTTTTCTCTATATACCAATGACTGCAAAGGATCCCTCTGTAAAA  
TACTGATGTTTGCAGATGATACAACAATGATTGATCTTATACAGACAATGAATCTGCATA  
CAGATGGGAAATGAACTGTCCCTGTGGTGCAGCTGGAACAATCTTGAACCTGAATAC  
ATTCAAAATGTAGAGATGATAGTAGATTTTAGGAGAAGGCCTCCTATTCTACCACATCT  
TACAATACTA-----

>Ophiophagus\_hannah\_eSHBV1

-----AAAAGCCATTGTCTAGACAGAAACATCATGTATGATTTTTCTAGC  
TGATAGTTAAAATTGAATAGTAATAATGCTTCTGGAATACATTAATAACATTT-----  
--AGAGTTGTCATTCTTTTTAATTATTTTTGTTAAAGGAAGCCTTGTATAGGCAGCCTT  
CC--AATACATAGGCAAATAAATTTAACCC-----

-----TGGCTGAGTCCTAAATAAAATAGAATGGAAAA--TAGTGAA  
GAGACTGCCTGGGATATTCAGTGAATAAGA-----AACATTTGTTAATATGTAACATC  
AAAGGAAACATTTTTTCTACAGTCAAATAGTAAAAGAAATATTTGTACCGATTTCTAAT  
TACTTGAAGATTGTACAAGAAAGAAAGAAAGAAAGANNNNNNNNNNNNNGGGAGG  
GAGAGAGAGAGAAAGAGAAAGGAAGAAAATAACTGTTAAGCTTTATACCATTCAATA  
ACAGTTTGCC-----GATCAAATAAATATACTTTGCCATAGCTTATAAAAGGATCTTTT  
CTAATTTAGCTATTTCCATTAATGTCTGAGTCTACTGATCAATAATAAGCATTGCTTAGT  
TTCCGTGTTTATAAGAATCATCTCCTTGGCAGCTGCAGCTTCATTTTTGCAAAGTAGCTT  
TCAATGAAATCAAAAACAAAACAAAAAAGAAAGAACTAAACCAGCTCGCCGCATGCAA  
ACTCAATAAGGAAGTTATAAACATGCTCAGAGTTAGATTAATTCAGTTATTTTGCTTTGT  
TGAGCCAAAATGCTAAAACCACAGAATCATTTATA-----ATGCTGGCATGGTGGAGAA  
ATTTTAGATATGTCAGAATTTGCAAATGTGACGGCAATCATTGGT--AGTGAAAAACAG  
CAT--CTTGAATCTCTAGAACAAGTTACTGGATTTTATCTAGGAGGTA-----GATAAAA  
T-----

-----CCAACTAC  
AAATGCCTGTCCAGAATCTCCCTCTGAACAGGTCTCGCATCTCCTTGGAAATCTCTGAG  
GCTT--TTTA--TCATCTTCTTCATCATCCTGGTGTCTGCCACTTGCTTCTTACGTGTAT  
CTGATGGGAAACATGTTTACAGGTTTAGGAAATGTCCTATGGAGATTGGTCTCAGCCCCT  
TCAACCTCACTCTCTTCACTAATGCCATTGTAGACCACATTTATCACAAATATATCATAT  
CTTGTTTTACTTATTTAGATTGACTTCACTCCACTCTCATCCAAACCCTAAATACCTTGCTG  
CCACTAGCCACGGTAGCATTAGGGTCTTCAAACCTTATGGAACCTTGATAAATATGATA  
AATCAACACCTGAACCAATACAGGACATTCATTACATTGGCTACTAAATTAAGTCCAGGA  
TAGGAATATATATATGTATAGGTAGAGGGGTGGATTTCTACCGTTCTGTCCGGTTCTGT  
AGAACCGGTAGCTGTGAAGATCAGCAGACATAGAACCGGTTCTATGTNNGCTGCTGTTTT  
GGCCACCCGCCCGCCGGGCTCTTACCTGTCNTTGGCGTGGCACAGCTGCTGTTGAAAAA  
GCAGGAAAAAGGGCTTTTCCAACCTTCTGCGCACCCGCACGCAACTGCTCAGCTGTCCG





AGATGGTAAACAGTTCAAAAAAAGGGTGCCAGGATGAGATGGATCTTTGAGAACGTTCTG  
AACTTTTTTAAGGTAGCGGGAGCTTCCAAAGAGGGGAGAGGGCAACCAATGATGTTAACC  
CTCTGCAGTGTCTTATCTGCCACTGTGCAATTGGCAAACCATAACAGAGGTGCAGGGA  
GTTAAGATACTCTCTATGGTGCAGCGGTAGAAGGTCACCAGCAGTTTGTGTTTTCTGAG  
AAGTCTCAGGTACTATAATCTCTGCTGGGCCCTTTTACTAGTGTGCAATGTGAGCACC  
CCAGGTCAGGTNATCTGTTCTTCTATAGTCCACTATAAGCTCCTTGGTCTTATTGGTGT  
TGAGGACCAAGTTATTGTCTCCATACCATGAAAGCATGAAATTAACCTAAGAAATGCCATT  
AAGTTTTTGGTGTATTATGTCAAACCTTGCACAGAAAGTATATATGCTTAAAGCCATAATTT  
CTGTACAGATTTGCCCTCAAATTAATTTCAACTATTGAACTTATTTCTATTTTTTCAG---  
-AATCAGTGCAGTGTATTGGCACTGTAGTTTCTATTAGAAGAGATGGTGTGATGGTAA  
TAGTGGTGGTAAATCACATAATTAATAAATTAAGTCTGTGTTAAAA-TTCTGATCTTCATG  
ACTCCATTATGGACCATAGAGAGTGAAAAAGACCATCTCAACTGTTTATAAGAACTAACCT  
GCTGAATTT-----ACATTTAGAATAACTTTTCAACCGTTCAACAT  
TCA-----TATTTTGTTTTCAAGGCATAGTTTGTACCATGACAAGCAATGTACTTTC  
AGACACCTTTGTATAAAA---GAAGATGGCTGACACCACAGCCTCATGGAGAAATATAT  
AT--TTCCCTGAAAAA--GTGCTATCAAATAACAAGACTGAGTTATTACTTCTTAACAA  
CGGTAAACTATGTTTTCAAAAAGAAAAAAGAAGGGGTTTGTGTGCTGATGTTTACACTT  
AAAATGTAAGTTTTTCTGGTTTTTACAAAAAGAAAAAATGTCTTCTCTATGAAAGGCACT  
GACTAAGAAAAAATAGCTGATGCAAAAGTTTCCCTCAACTTGGAAAAATTGCATTGGCTATA  
AATATATAAATAGTATCCTATTAAAAATCCACCAGCAGCAAGGACTAGTTTAGAAACATT  
AGTGAAGGAAGATTGTTTACATATTGGTCTTTATATAAGAAGCTATATTTAGATTATGAG  
ATTTCTAACCTAGTATAAATAAATATTTTCAAAGACAGAGCCAATTCAGGAATCAGGTG  
GACAAAACCATAATTATTAATTATTAATACTTTTTAAAAA--TCCAATCTTTGCACCATC  
AAGGTTACATCCCTACCCTGCTGACAGCAACAGAAGTGAGTTTGGTCTTATTAATTATA  
CTCTACAACCAAACCTGATACCAGAACAATTTGTATTGTGATGACTTCCAGGCATCAGCCT  
TATCTTTAAGGCAAGTGCTTTAAGAACCAGTGATCCACATCAGTTTCATTAGTGGCTTTG  
GTCCAGTTTTAATTAGGTGATGATCTGTATATTATAGTGTGCTTAATAAGAGGGTACTAG  
TGATTATATGGATACTGCTGTTTTCTCAAATATTATGCTTATGATGTTCTTCATCAAGC  
CCTGGGCTTTTCTGGGTACCTCCATTTAAGTGGGAAAGTAGGTAAGAATGTTAAAGTT  
CATTGAAAAGGAGATCATTGTAGTAGCAACCCCTCTGAGCATGGTGACATATAGTTACAAC  
CTGCCTTTTTTTT-CTTTGTGTGAGTTGGATACC-AAATTTCTCCCTGTAATTAAGTGA  
GACTAAGGGCCATTAAGATGGCAGGTGATAGCCCTGGCTGCAGATTACTGGCAAATGC  
ACGGCCTTGAAAAGATTAGAACCAGTAAAAAATCATTTCAGTGTTTATGCTATGAGAC  
TAAAATGTGGTGGAGAGAGAAAAGACAAATGGAAGGTCAGAGCAAAGAGGACAGAAGATT  
TGATGGCTTTAATCAAGATATTTTTTATATACAGTTTTTAACTATGTAACAGCCAGTAAAGG  
AATGAATTAACAAAACAATTACTAGAGTGGATTAAAGTAGTAACCTCAAGATATCATCCCA  
TAATCATCTTCCATTTAAAAAAGGATA-----GGAAAATTATCAGAATTAT  
CAGAATTGTTTTACTCAGAAGAAAGTGCCACTCAATTTAATCTTGGCTGATTTCAAAGCA  
CTCAGATTGTCTAGTTTGCATTCAAATGGGACATCCTTAACAAGTTGTCTATGGAACAGA  
AAAAGCATCTAGAAGAAGGTAATGGCAAAACTATGGGATATTTT-AAGAAGGACCCCTTA  
CCTTTTTAAAGACTAAAATCAAATTACATTTATGTGTTGGCAAATAAATCCTTTAGGAAA  
TGTTTTCTCCAATGCAAGACATATGCATCTCAGGATTTCTATGACGTAGGAGGAGGTTT  
AGCAGTGGGATTTACTGGTTCTGTCCACCTCNC AACCTCAGCTGCTTTGCGTGGCACA  
GCTGTGGTTGAAAAAGCAGGAAAAAAGTGCTTTTTTTCAAATGCTGCGCACCTGCACGCAG  
TGCTGCTCAGCTGTCCAGGCAGCAACCTGATGATGTTATACATGCGCGCGCAAATGTAA  
AATCACCGAACCGGTAGTTACACCGGTGAGATCCCACCCCTGAGGAGGTTACGATATTGG  
GAGAAAATGTAATGGTAATTTATGTAGGTAGGACACAACCACATATCAGTGCATTGTTCT  
TCTAGGTTAGGGTTGTTGCTTAGTGTCAAGCTCCATTTCAGAAAAGCCAGTCAATGAGTTT  
GCTACTTATGTTTTGGGTTGTTGGTTTTTTTAGCAATACTACCTAAATGGACATAATTAT  
TTTTAGTAATTCATAGTTTTATTTTATTTAATTGATTGGTTGCCCCCCCATGTTTTAAT  
TTTTGAAAGCCACTCAGAATCATATCAATCTATAGATAGCTAGGTACCTATATAAACTAT  
ATTAATTAATATATCTCAATTTTCTTGTAGGAAGCCTAGGATAGTATATGAAACACTGGC  
TCATCAAATTCCTCCCTCTGAACAACATCTTGTGAAGTTGGTGAAGTGGGTTTCAGTGG  
ATGATTTTTGCTTGGCCAACATATTATGACAGCTATATATGTAGATCATATAATTTATT  
TTAATGGATCTTAGGGATTGCTTTATTTAATGGATCTTAGTCTTGCTTCTAGACTGTA

TCAAGAAAAGACAGATTTAAAAAGAAAAAGAAAAC TAGTAGGGAAATATAAAATGGCTAG  
TCAGTTATAAAATTTAAAAAGTGATAAAACTATTTTTATCCACCTAGAAACTCTAATTCTG  
CTTAAATCTTACAGCATTTTCTTTACATAGCTTTCTTTGCAACAATAATAAACATAGCA  
ATGCTATTTTGTTTTTGGAAACAAGCAATTCACACTTACTCAATTTGCTATATTTTTCTTT  
TAAATAAAATAATATTTGAGAAATACTGCAGGAAATATTTTCTATATTTAACAAAATTTT  
TATAGATGTTATAGTTTACAATGATTAGACTGCAGATTTATTGTTATTAAATTTAACTTT  
CCTTTTTAAGGCTATAATGCTTTTTAAGGTAGTTTGCACAACCTACAGTATAGCATAGTAGT  
ATAGTCATATAAATAACAAAATCAGTAGATCAGCTAAGATCTAATTTGAACTCCAGATTA  
AGAAATGTGCCACATTC AATTGAAAAAACAATTAGATTATTTATTTATTGGAAATGAAT  
ACAGAAAAGTGGAAAGGACAACCTGTAACAGATGAAAGCCTACAGAAAAGACTGGACACAGAG  
AATAATAGGGTTTTTACTACAAGTTAGGCAAGATTAAGAGTTT CAGGAAAGACTATAAACAA  
AAGGTTATGTAATTAAGAAAAGTAAAGGATGACTGCAAAAACCTACAAAACAACTTTAA  
AAGATTAGCAGAATATATCTAAATTTCTTTCTCGATTAAAACAATGATTTCACTGAACCC  
CCAGATCTGTTTTCTGAATTAGTCAACCATTCAGATTTTATCTTTTTATAAAAAAATAAT  
AATACAAAATTAACTTTCAAATTCAGTCAAAGCAGTTAACCAAATGACAAATCAAATCA  
GATGAGAGGTATTTCTTCTATGTTTAAATAAAGCTGCAAGCATGCACCATCTAAATTAGTA  
AAACAAGTAACGAGATGCAGGATTTGGAATCAACATGGGCAAGGATGTGTCTGTCTCTG  
TACTTAAAGAAGCCACACCTTTTCTAAGGCTCACGTACTATCCATGCAGGTCAGGAAAAG  
ATGTTTGTAGTTAAGGAAGCATTAAAGAGGACGGACCCTGTGTTGCTGTATCAACTTA  
ATTCAGACATGCATGTCCCTGAGCCCACATGCTTGTGGTGAAAACCTCAGGAAAAGATACA  
AGCCACCAACAAAATACATAGAGTGGCCAACACTAAATCTGAAATAACCTTACCTGTTTTG  
ATTTCAAATACCTGCACATAAATGAAAAGCCTGAGGATTAGAAATGTAAAAGCTAGAGCTA  
TTTACTCTGCAAAAATAACTAATTTCCCACTGCTTATGCCCTGGGATATCAAATCACCTAG  
TAGGTCTGTATTACTATTACTATTATCCTTCTCATCTTTTCTATTACCTGTTTCTTAGC  
TTCTTATGACTATAACTTTGTTGTTTGTATCTCATGAGTTATGCTGATTGCTTTTTATTTA  
CTATCCTATGATGGTTTATGTTGACTGATTATTTAGTATCCTATGGCTATCATTGAGTGT  
TATATCTTATGATTTTATGGTGATTGTATTTTATTATCATGATCATGATTTATCATCTGTT  
GCTTGTATGTATACTGAGAGCTTATGCACTGGAGACAAANNNNNNNNNNNNNNNTCACA  
CTTGGTCAATAAAGAATTTCTATTTCCATGGCTGTTAACTTCAAGGAAAATATGTTATCTT  
TCCTCCAATTTTGAGCTGAGGCTTATATTTGTACTTATGAGTTCTTTATTTTGTACTTGT  
TATTTTGCTTATAATTTAATTTACTTATAATTTGATAATTTTGCTTGTGGATGTACTTAT  
TTTAGTCCCTCCAGGAAAATCAAATGGCCCAGCTGCTTCTGCTGCATAACCTCTTGCA  
ATCTAGTTTGACTGGAAAGTGGATTTTTATAACTGCTAGACTTACTCTTCCCGTAAAGAA  
AGTGAAAGATGCTTTTAACAGATGTATTTAATCAAGAGTACAAGCTCCTGCTGCTCTTTC  
CTAAAAGTGAAAGCAGGTTTCAGGGTGCCCTCCTGGATGTCTATGGAAAATGGCATACTTC  
TTGCTCCATTAACCTGCTGTGTATGTATGGCCACTAGGATGACTAGCTGCTAAGCACTTTA  
CTGCCCATCTACATCTAAGTCAGTGCTACTTAAAGCTAATCACATACTAACTACATATCC  
CAGTGACAAAAGCTGCATTTCCCACTCTGTCTGTATTGATCTCCCATCAGTCATTTGTAAGT  
GACCATGCCAGACATGGCCCTTGGGCATTTTTCCAATACAGAAGCCACTTAACATTA AAA  
TTGCAGGATTGCTCTTGGCTGTTTTACAAGCCTTTATCAAACCATTTAAAAATCTACCC  
TTAATCATAATGGCTTTATGAATTTCTTTTACCTTTGAGCCTTGACCCCTTTAACATGA  
CAGAAATATTTGGATCATCACTCCCATTTGATGCTCTTGGACCACACTGCAGAATACTG  
GTTATATGGACCATTTATGATATTTTGGAGATTATTTATTTAAAAGAAAAGAAAATCCATT  
AAGTTTTACATTTAGCCAAGGATA-

>Python\_molurus

-----TAATGAAAAAACCATTTGCTAGGCACAAACATCATGCATGATTTTTCCAGC  
CCATAGTGTAATTCGACAGTAATAATGCTTCTGGAAAACATTCCTAGTTAAAATTGAGA  
GTTGTCAATTTCCACTTTTTAATTATTTTTGTTAATAATTACCT-GTATTG-CAGCTAC  
TAAAAAAATATATAAATACATTTAACCCAAATGTGAATATGGAAAGTGACGCTCAATAA  
GATTATGAAC-AAGCAGATCAGAGCTTTTAAAACATAGCCTAAAGGTGAATAAATATTT  
CTTTTAGATTTGTTCTCTGGCTGAGTTCTAGATAAAATAGAATCGAAAAACA-A-TAAA  
GAGGCTGCATGGGATATTTCCCTGAGATAAGACAAAGCAACATTTGTTAATAAACCACC  
AGAAGAAAC-----  
-----  
-----

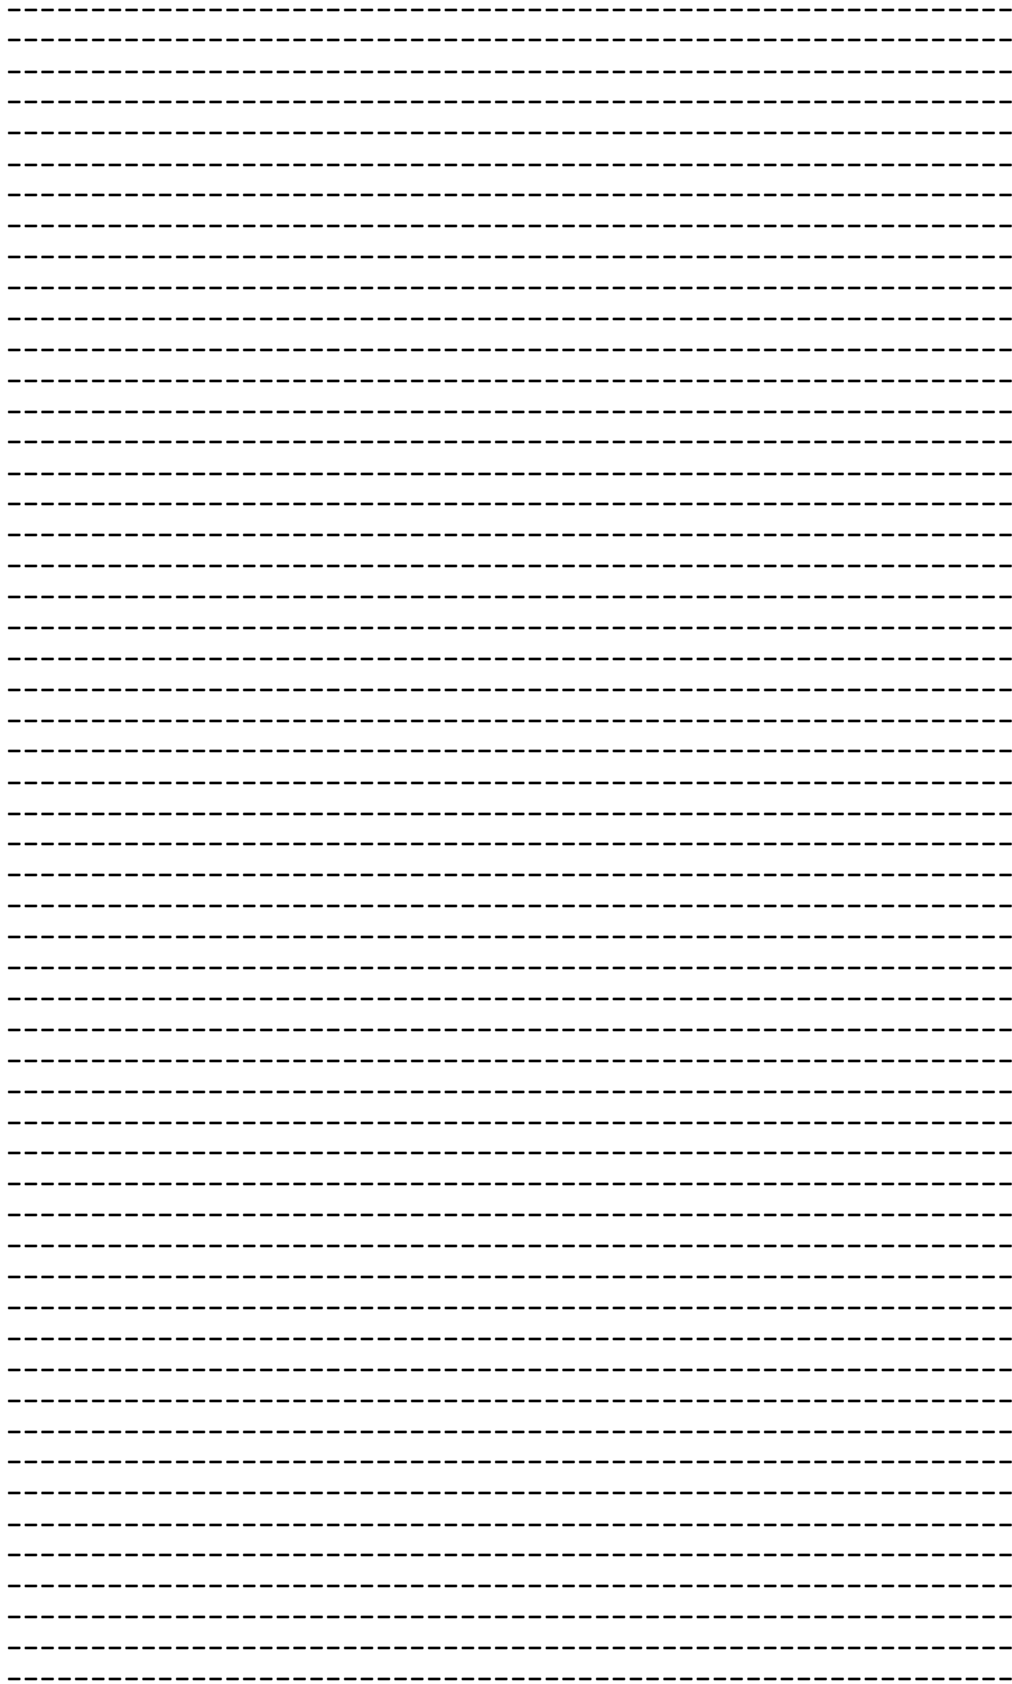

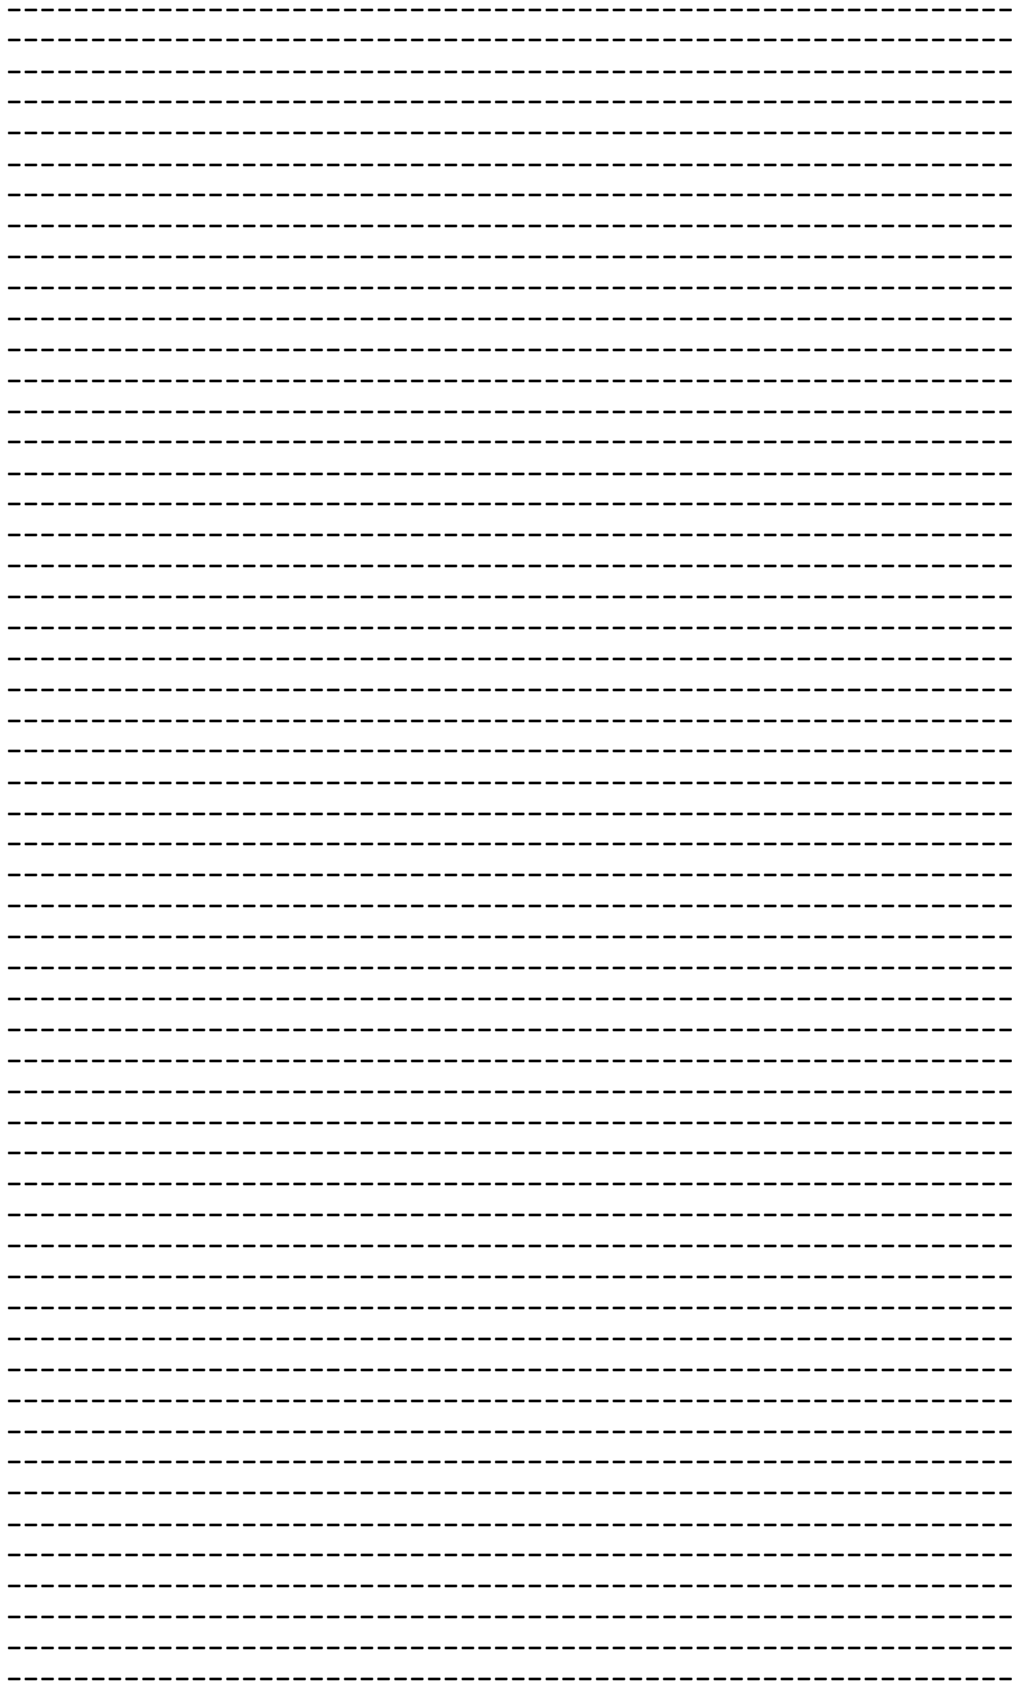

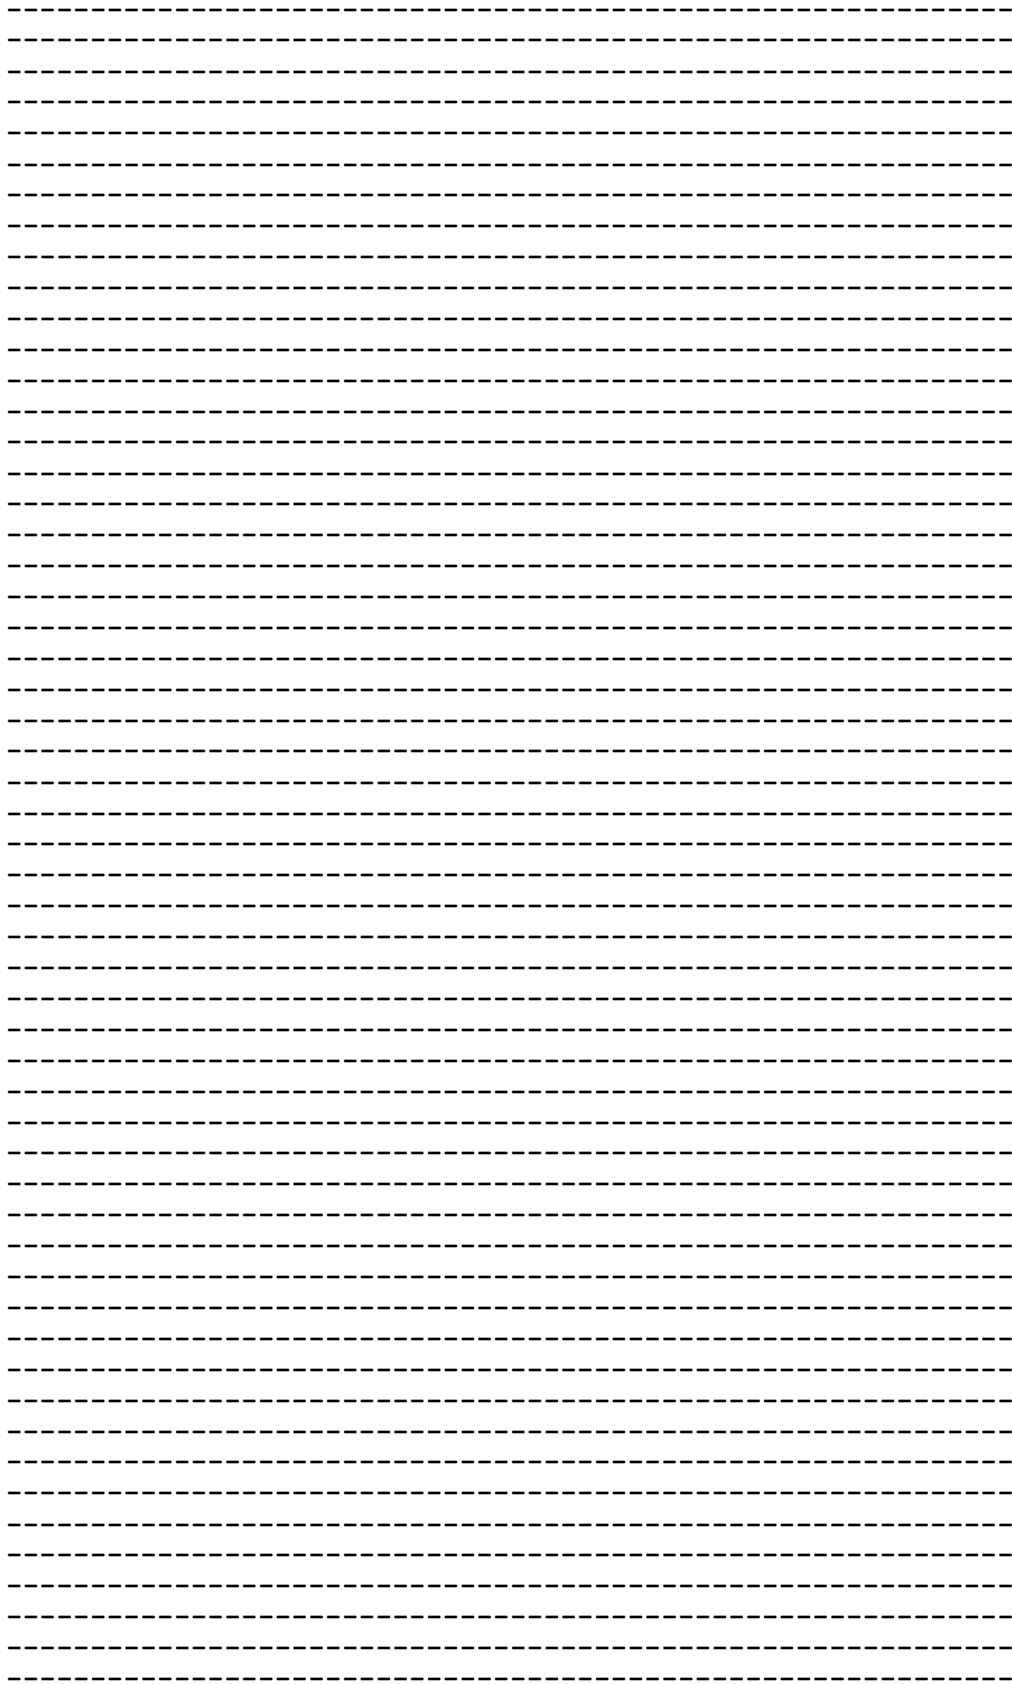



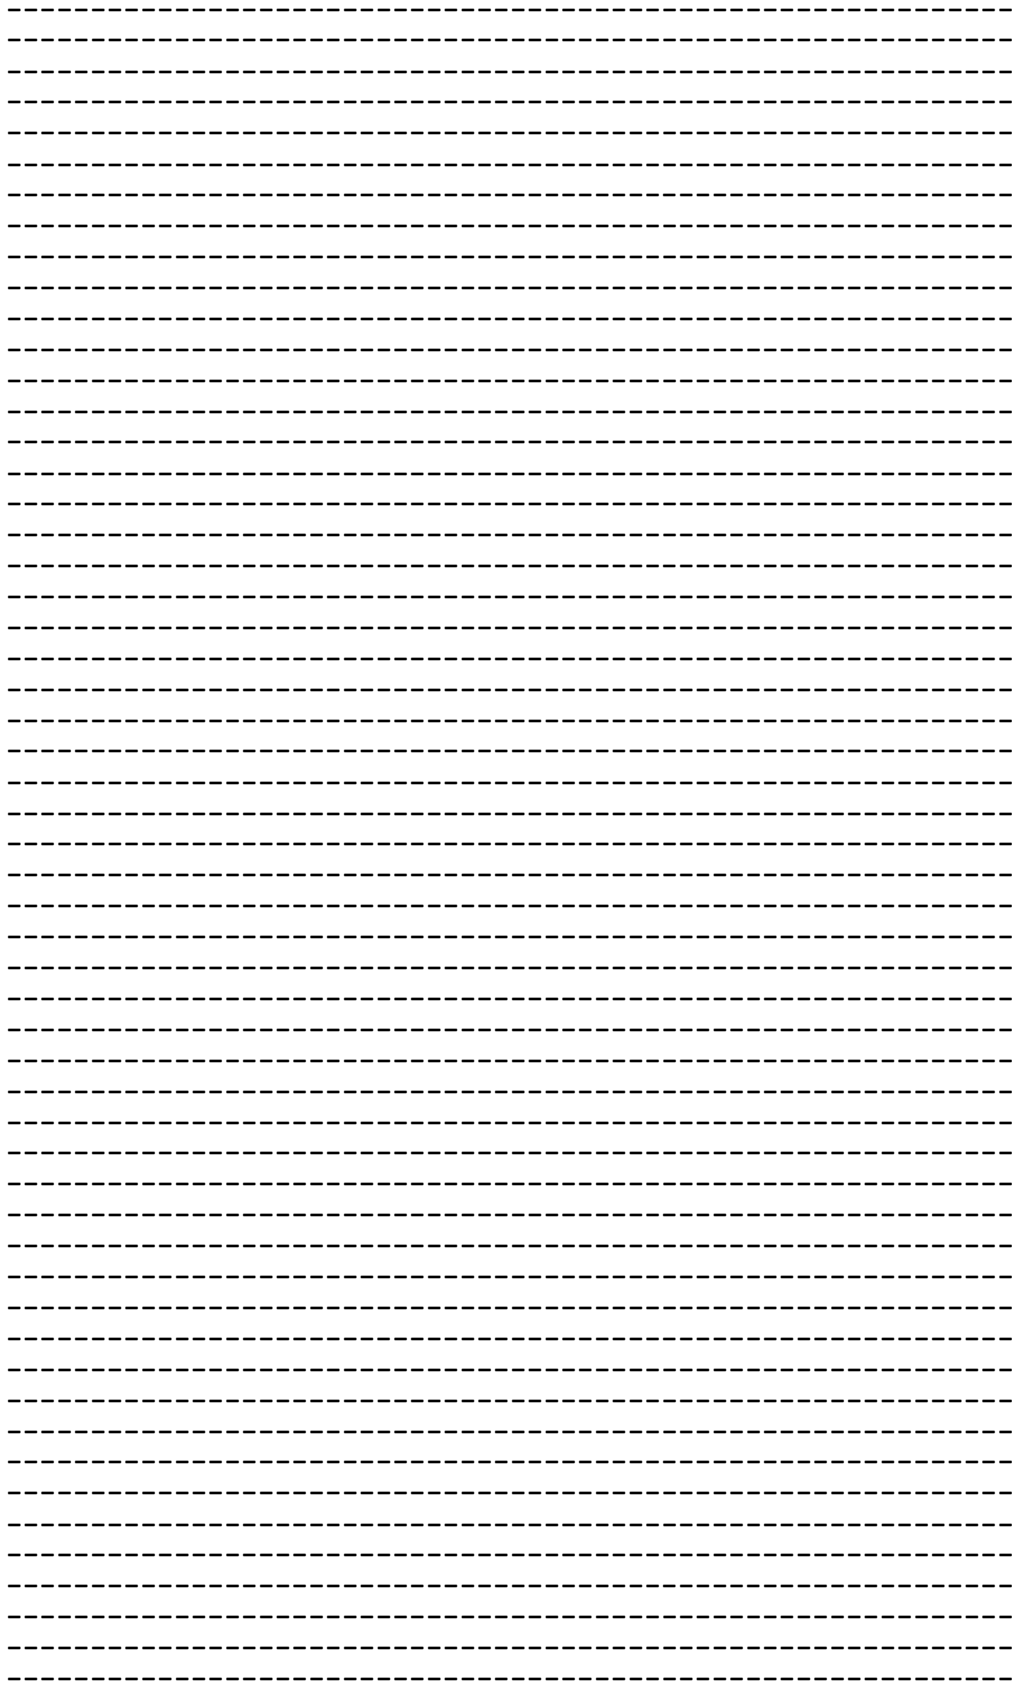



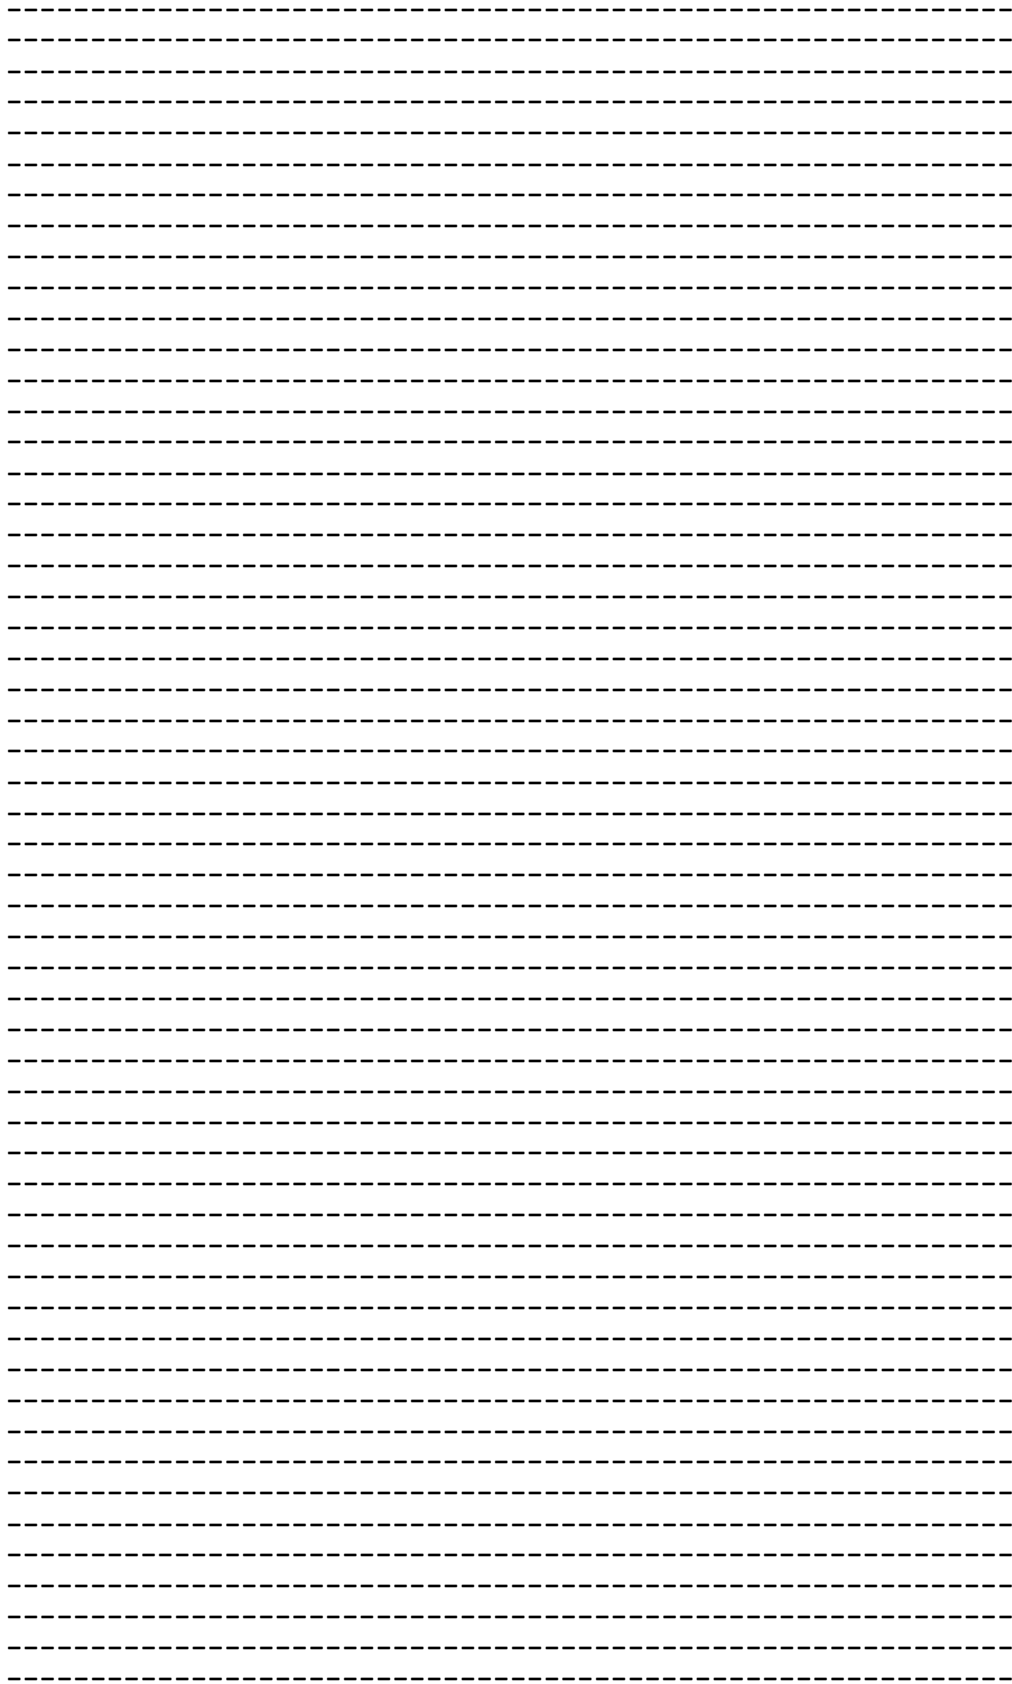



## Supplemental Dataset 12

>Crotalus\_mitchellii\_eSHBV2\_contig\_192207  
ACTGGTAAGTGTTTTCTGGTTAACAAGAATTCTAAAGATTCTTCAAAATGCAGATTGGTG  
GTGGACTTTTCTCAGTTTTTCGAGGGGAAGTGCCAAACTGCACTTTCCAAAATACTGGGAGC  
CCAAACCATCTCTCACTTGCAAGGATGCTGCCAATGACATGTGGAGGATTCCTTGGAT  
ATGTCTGAGGCGTTTTATCATATTCCTATGCATCCTCATTCTTCTACTCACCTTCTTATT  
TCTGATGGGAGTCAAGTCTACGGATTTTCGTAAAAGTGCTATGGGAGTCGGTCTTAGCCCT  
TTCCTCCTTACTATGCTCACTAACCTCCTTGCAACAAACATTTCGTTGGACTTTCATATT  
TTCTGTTTTGCTTATATGGATGACTTCATACTCTGTCACCCAAACTACAATTATATCCAT  
GCAGCTAGTTCTGCTATTTGCAACCATCTACAAAACCTTGGGATCGTCATAAATAAAGAT  
AAAATGACTTTAACTCCAGCGAAAAGAAAATTAATATTTGGGACTCACAAATTCGGCAAGA  
TTATTAAGACCTCCTCAATCATATAGAAAAGAACTTATCAAATTATTAATGACATAAAT  
ATAAATCACTGGTATGACTGGAAATGTATTCACCGTTTTATCGGAAAACCTGGCTTTGTT  
TTAGGATTTACGGTTTTATGGATATGCGATTTTACAGCCTTTGTACACAGCAATGTCTGAA  
CATTGTGATGTGCGTTTTACTTTGTATTATAAAAATGTATTGATAAAAAGTGGTAAAATCA  
ATCAAAAAGCATTACGCTGAGAACAAAAGAAAATATCCTATAACCTAATTTTGCCTGTGAT  
GCTTGTTTAGAATCATGTGCTTGGGTAAATTTTCGAAAATCAATTATATAACTTTGTAT  
TTCAGAAATGATTATCCTATTTCATGTAAAAGAAATTTGTTAATCACTCTGTATGTTATAGTT  
AATTTTCAA-----CCTAAAGCTATTGAAACTGATTCT  
ATGTATGTTTTACACAAACATTTCAACACTTTGCCTTTTGGACTGATGATGTTTGCCTTAT  
GATACCATGAGACACGTACGCATGTACTTTGTCCGAAGTCAAGATAACATCGCTGATCGG  
TGATGTTACACCATGGAACCAGTTAACTTTGATTGTTTAAATATGATCTACTTTGTTCCC  
TTCTTTAAACCACTCAGTTCCCCTCTGATAATAGAAGAGCTGTTTTGTATTTACTTACT  
AGTGAACCTTTGCTACTAAGA-GATCGGAAGTTATTC----ATTTTAGCTAATGATAAATA  
TATAGATATATAACAAAGAGAAATCAGGAGATCTAAGAAGAGAAAAGTAAATAAATTT  
TCTGCTTGTAGTTGTCAGTTTTTCTACTACATTAATTCCTAAATGTGTAATAA-TACAATAA  
AGAGCAGGAGATTTTTCTGATCCTGCAACAATAAGGTTCTTCTTAGATCTTAGTCAGAA  
GCAAGCATTTTATCTCCAGTGTTAGTTCTCCTATATACAGTATAGTAGTCCCTCAGCTTAT  
GACCACAACCTGGGACTGGAACCATCTTTGTTAAGTAAAGTGGTTGTTAAGTAAATTTGTGT  
CCAAATATATAACTCTTTTTGCTGCACCTTTTTAAGCAAACCAGCGTATCCCATTGACTTT  
GTTATCAAAAAGATGGCTGAGAAGATCAAAAATGGTGATCACGTGATCCTGGGATGCNNNNN  
NNNNNNNNNNNNNATGCCAGTTGCCAAGCACCAATTCATGATCACATGTCCATGGGAAC  
ACTGTGACTATCGTAAGTGAAGGATTGGTTGTAAGCCACATTTTTTCAGCAAAATTTTCA  
AATAGTCACTAAATGAATGGTAGTAACCTGAGGACTATCTGTATGTGTGCAGAGAATTGT  
GCAGTTGCAAGCATGGATGAAAAGAAAATCCTCCACAAATTTTTCACAGAATTAATATTTA  
AAACCTGCCAGAATCGTCTCTCCACAGCACGAACAGCAGCTCTGCATGGAATCTGCTAG  
TGATTTCCCTCCACACAGACCCTCCTGCAGAACATTGCATATAAAAACAGGGTGTGACATA  
ATAAAGAGAGATAACACTGGGGAAATTTATGTTTTAAAAGGCTTCATAAAAAAGCCTATG  
TAGGAAATCTGCAATTTTTGAAAAAGGATCTTGGGGAAATTTATATTAATAAGTGCCTTACA  
GGAGGGTAAGCTGCATTCAATAAATCTCTGCATTGGGAAAGACTGTGGATGAAAAACGGA  
TATGGAAATAAGTTTTAATCTATTTAAAAACATCACCATCCCGCACCCCAAGGGACTAAC  
TCTGTTGTCTGTGTTACTGTTAGAAAAGAAAGGATATCTTTTAAAGCTAGTTGAATACAG  
AATGGGTGGGTGTGGGAATGGAAGAATCCAGTAATGTGATGGCCTTCTGAGATGCAGGCA  
TATGAACTGACGACTTTATTCAGAGTGGCACTGATGCTTGGACTGTTTACAACCTGGCCT  
TCCACCTGCTCAGCTGCAGGCATTTGGAGCAGAGGGCTCCTTTTCATTGCCAAACTGGGC  
TTCAGCCAAAGGCTGCTCTGAACAGAGCCATCTGGGCAAAGAAAAAGGCAGCGAAGACC  
CACAGAGCTACATCTGGATTAGCAATCTGGAGTAACTGAAGTGGGGCCAGAGAAGAAAAG  
GAGCAGGGAAGATATAATCTGGAGGAAAATCAGAGTAGCTCTTTTCTTCGGTAGTGAGAT  
AAACGAAAATACATGATCTATGAACCAATAGTAGTTCTTTATATTTTACAAGCAATA  
ATGCTAATTTAGCTTTAGATACCTTAACCTCCTTGGCAGGGTGGGTATTCAATTTGACT  
ACTTTCCCTTATATGGAGCCAAATTAACCTCCACTGAGTGTAATAGAATTTATGTTTCAG  
CTGGAATAATATTACATTAGACTACTTCCAGGTAAGAAAATGTATATCATGTCTGTGTTA  
CATTTTTCTGAAGCAGCATAAGTTTGTGTTCCAAATACTTTTTCACGCCAAGCATGCACA  
ATATAATTTTCTTATATGAGTGGCTCTATTTGTGATACCTTTGCCTTGGTGGATTATACC  
TGTCTTTTAAATGACTTTCACTGCCCTGGGTGGTATTGCCAGGAAAAGTCTGGAGTTTGC  
CTTTATTTTTTCTAACTTTCCAGTAAATACATCATCAATAAACAGGAGACAAAGGGAACA

TGCCACAAATGTTACCAATATGTGCTAACTCTTGATGAACGAGAATTAAGAGGAAGTTAA  
GACTTCCTCTTCTTTTTATGTTCCCTTTTCTTTCATCCAGACTCCACCAGACATCATTAT  
GAAAAGGAGGACTGTTGTTTTAGAATAAGACAATTAAGAGTGAAGTTGGTGACATTAAGG  
TAACCCATGATTTATGGTCCTGATGCTAACCAAAGTCCTGTTTGAAGCCTAAAATCCCAT  
CTTAGAGATAGGATCAGTGCTTTTTTTGTAAAAAAAAGTGCCGGAACTCACCCATGTCA  
TACAACCCGCTTGCCTACCCTATAAGGTTCCATCCAAAAAATGTGCCAGAACTCAGTTC  
TGGGCGTTCTATCCCTGGATAGAATGATGTGACTGCTTTATGGAAGCACCTTTTTACTAT  
GGACCAATGGAATAAAAATGTATGCAACCAGAGTAACCTGGTTGCATTTCCATGGACTGT  
ACCAGTGGGGTTGTGAGGAACCCTATCTATGAGCAAGCTATGCCAACGTGTATCAATGAA  
AAGAGATTTAGAATCAATTAGAAATCTCAATATGGTCATTTTCAACATGACCATGAACTG  
GCATAGCCAAAATAATTTTATATTTCTGTGGGCCTATCCCTCTCCCATGAACTAACAGAAA  
ATTTTTCTTAAGGCCACAAAATGTAACATCTTGGATAATTAAAAAAGGAATGAACAGAT  
TTGTAAATAGATAAAATAGAGACTAGTGCGTTCCTGAGACCTTTCTTTTGCCTTGATC  
AGTTGTGCTGAAAATCAGAATGATATATCCAAGCTGAAAAACATCCAGTAGTGTATAATT  
TCTCTAATGAAAAATAATGGAATGTATAATTGAAAAACAATCTGTTCTGCAATTTTCTG  
TAGCTGTTTTTTTTTTTAAACAGAACAAAAGGCTCTATAGCATTCTATAAACAGCAAAGG  
TTGGCCACTTCAATAGCAGACACTACTGCTGGCAATTTGGAGCAATTTAATAAATATTA  
AAACAAAATGGAGCAAGAAATAACTTTCTAAAAGTTATTTTTCAGCTTGACAGTAGTCAA  
CATAGGATAACTACTGTCTCAGATCAGATAAGGAAGCAAAAAAAGGTTACTAT  
CTCCAACCACCGCACAACCTTTTTCTTCTGATCTCTTCAACTGGTCTATATTTTATTAC  
CAAATGTTATCATGGGCAATCTTGACAACAGAGAAAAATAATCCAGATTTTTTTTTCTTT  
GATCCACTTGATCCACAGTTATCTACTTTTATCCCTTTGTAGTCTCTTGCTAGCAGTT  
TGTCCATGGAAAAATGTCAAATTTTTCAGAGTGAAAAGATTACTCAGCTTGTTTCCATTGCT  
TGACCTGAAGACCTCTTCCCAAATTAAGTTTGACAAACCTGAACTTAAGATACAGTCTAA  
GGTGTCTGATTTGTTGTTGTGCCTCCTATCCTGTGGTATGCAAATATAAAAATTTGCAAGC  
TTTTGATTCATTGACTGCAAAGTGTTATTTTAGCAAACCTTTTTCAGTTAATCAACTGGTAG  
GTGGTGATCAGTGATGAGATTAACAGATTTCTGGTTGAGAGGTTAACTTCTGAAACAAC  
CTTAGGGCTTCCCATCTATTTGTGCATAATTTTTTTCCGAGCTATGAGTGGTATGATGC  
AAATATTTCTGGGTATTCATCTCTGCCTTTCATGGCATGTGCCACAACCCCATCAATTCCA  
ATTTGACTGATAAGTGAATGTCTGATGTCATTTTTCTTTGCTTCTGTGAAAGCTTGT  
TTGCATGGTTTTTTCCCTTCAAATCCTTCTCTACTTGTAAACAAAGTGCTCAGGTAATGCT  
TCATAGTGGCTCAATTTTGCATGGACCTGTAAAACATCCATATCTGTTAGATATGTTGC  
AGTGAAATATTTCTTTTCCCTATGAAACATGACACATCTGCAATCACTAAGAGTTTGGTGG  
GAAATATTTTGTATTCTTTTAACTAGTTCTGCAAACTGAATTATGAGAAGTTTTGTGGG  
ATACTTAAGCTGCACATAAGCAGTTTAATTTGCCTACTATAATGTCAGTAAAATGTGACT  
CTCTTTTTCCAGCAACCATTTTCTGATCCAAAAATGTTCAAGTCTGTCTTTATACAA  
TAATAAATATCTGTTGAATATCAAATGCATTAATCTTTCCAATAAAACTAGACATCCC  
ATTGTGCTCTTCCCCCTCCCTGTCTTTATTTCACTGACAATATTCAGTGTAAATCTCCGTT  
TGCACAGTTTTTTTTAAAATGCCCTTTCTCACCTCCAAAATTAAGGTGAAGTTAAAAGATG  
TACTAAAAGATTCACAGTGCTGCCATTTGTTGGTATTTCTAATGGTCCAGCAAAACATA  
TTGCAGCCAGAAATAGATATTTGGGTTGCTTTCTTTACTCAAACATCTAGAAAAATGAAG  
TCTGTTATAGCTGTAAGAATTACAATATATCTTGTGTCAGTACCAAGTAGTCAAGCACAGTA  
GCAAAATCATAGGGATGCTTACAATTATATCCCAGCATGCTAAAATCACCTTTAAAATGT  
ATTAATATTTAAAATCTTCAATTGTTTTCAGACCTCAGATGCCCCAAAAAGGAAGCAAGCA  
TTCATTCATTTAGTTTAAAGCATCCATAACAATTTCTGTAGGAGGCTTGGTGGCTCAATGTT  
CAAAGATGCTGAGCTTGTGCGCTAAAAAGCTGACAAGCTCGGGTTTGGACTTGAGTGTCT  
GCTTGACAGGATGAGCTCCTGTTACTTGCCTGATCTCCTGCCATCTAGCAGTTCTGCTA  
TCAATCAAATGCCAGTAGATAAATAGGTACCCT

>C. aquilus\_eSHBV2

-----  
-----  
-----  
-----  
-----  
-----



-----  
-----TTTTACTTTGTATTATAAAAAATGTATTGATAAAAAGTGGTAAAATCA  
ATCAAAAGCATTACGCTGAGAACAAAAAAAAAATATCCTATACCTAATTTTGCTGTTGAT  
GCTTGTTTAGAATCATGTGCTTGGGTAAATTTGCGAAAATCACTTATATAACTTTGTAT  
TTCAGAAATGATTATCCTATTCATGTAAAAGAATTGTTAATCACTCTGTATGTTATAGTT  
AATTTTCAA-----CCTAAAGCTATTGAAACTGATTCT  
ATGTATGTTTTACACAAACATTTCAATACTTTGCCTTTTGGACTGATGATGTTGCTTAT  
GATACCATGAGACACGTATGCATGTACTTTGTCCGAAGTCAAGATAACATCGCTGATCGG  
CGATGTTTACACCCGTGGAACCAGTTAACTTTGATTGTTTAATATGATCTACTTTGTTCCC  
TTCTTTAA

>Ophiophagus\_hannah\_empty\_site\_342

-----  
-----TTCCCCTCTGCTAATAGAAGTGCTGTTTTATATTTTATTTACT  
AGTGAACTTTGCTACTAAGAAGATCAGAAGTTAGTTATCTCAGCCAGTTTTTAATAATAC  
TGATAGCGATAGAACAGGAAGGGAAGGGAGATCTAAGAGGAGAGACTGAGTAAATAATTT  
TCTTCTTGTAGTTGTCACTTTTCCCCTACATTTATTCCTATTTATTGTAAAATACAATAA  
CAAGCAGAAGATTTACTGATCCTGCAAACAGTAAGGTTCTTCCTCAGATCATACCCAGGA  
GCAAGCATTTTATCTTCAATGCTAGTTTTCCCTATATACAGTATAGTAATCCTCAACTTAC  
GGCCACAATTTGGAACGGAAACCAT-TTTAGTTAAATAATGTGGTTTTTAAGCAAGTTGTA  
TCCAAATCTATAA--CTTTTTGCTGCAGTTGTTAAGCAAATCCAGCGTGCCCATGACT  
TTGTTATCAGAAGGTTGCTGAGAAGATCAAAAATAGTGATCGCGTTATCCTGGGATGCTG  
CAGCTGTGCGTAAGAACATGCCAGTTGCCAAGCAACCGATTTCATGATCACATGACCATGGC  
AATACTGTGAC-AGTCATAAGTGCAAGGACTGGTTGTAAGTCACTTTTTTTTTTAGCAA  
GTTGTAATTTTCGAATAGTCGCTAAATGAATGGTAGTGACTTGAGGACTATCTGCACGTGT  
ACGGACAGTTGTGCAGTTGCAAGCATGGATGAAAAAGAAATCCTCCACAGACTTTCACAG  
AACTAAT-TCTCAAACCTGCCAGAATCGTCTCTCCCACAGCATGAGCAGCAGCTCTGCA  
TGGAATCTGCTAGTGATTTCCCTCCACACAGAACCCTCCTGCAGAACATTGCATGTAAAACA  
GGGTATTGACATAATAAAGAGAGATAACACCGGGGAAATTTATGTTTTAAAAGGCT

>Python\_bivittatus\_empty\_site\_KE956135

-----  
-----  
-----  
-----  
-----  
-----  
-----  
-----  
-----  
-----  
-----  
-----  
-----  
-----  
-----  
-----

TTCTTGGAACCACTCAGTTCCTCCCTGATAATAGAGGAGCGGTTTTATGTTCTTCTTACT  
AGTGAAGTTTGCTACTAAGTAGATCAGAAGTTACTCGCTCCGGCCAGTTCAATAATACT  
GGTAGACATGCAGCTAAGGGAAGTGAGGGGATCTAAGAGGAGAGACTGAGTAAATAATTT  
TCTGCTTGAGTTGTCACTTTCCCACTATGTGTATTCCTATATGTGTAAAA-TAGAATAA  
AGAGCAGGAGACTTT
