# Supplementary material
Source: PubMed Central journal article supplement (PMC4132678)

**Supp figure 1 – Map of snake endogenous viral elements found in the rattlesnake genome**

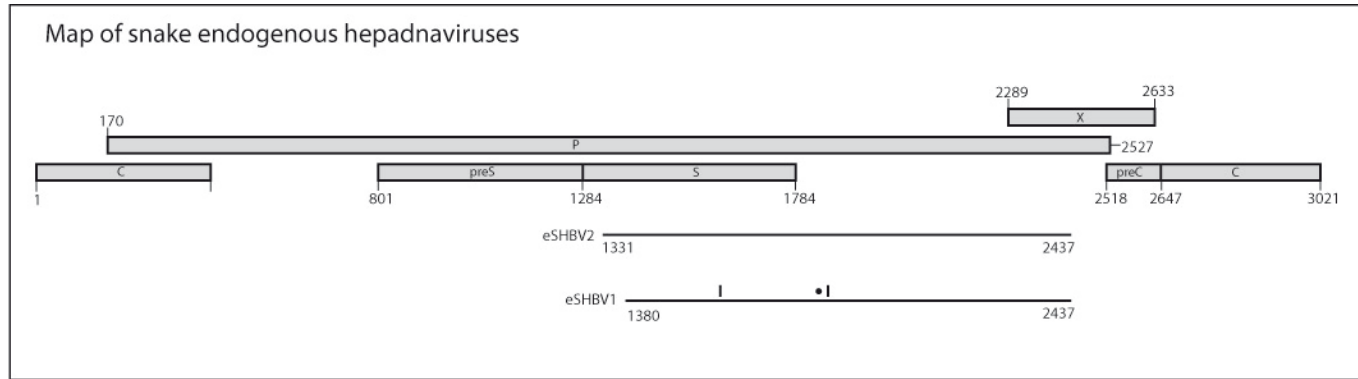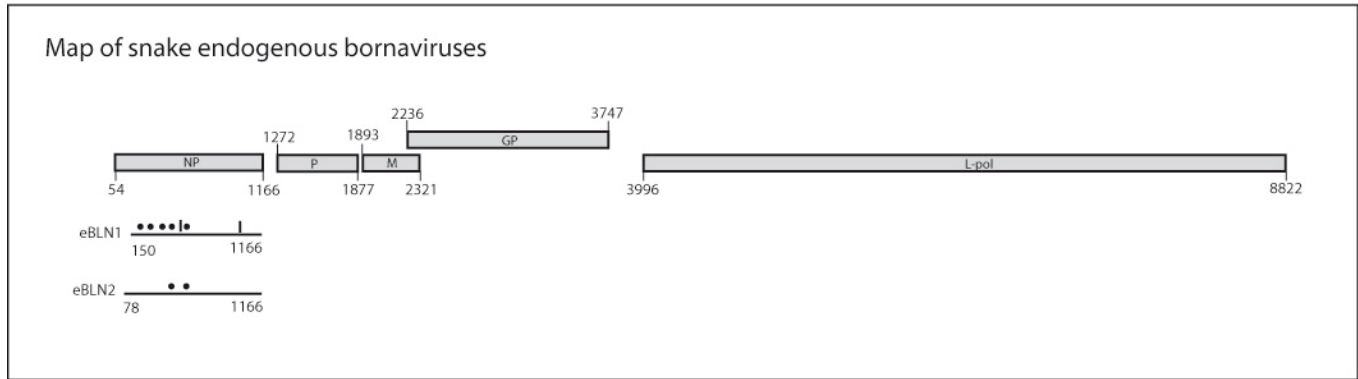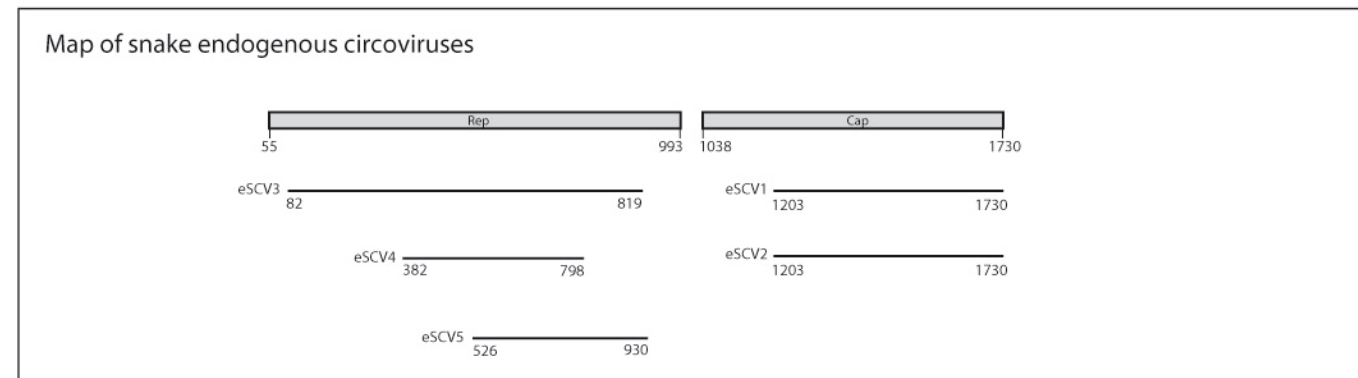

Supp figure 2 - CIRCOVIRUS CAPSID

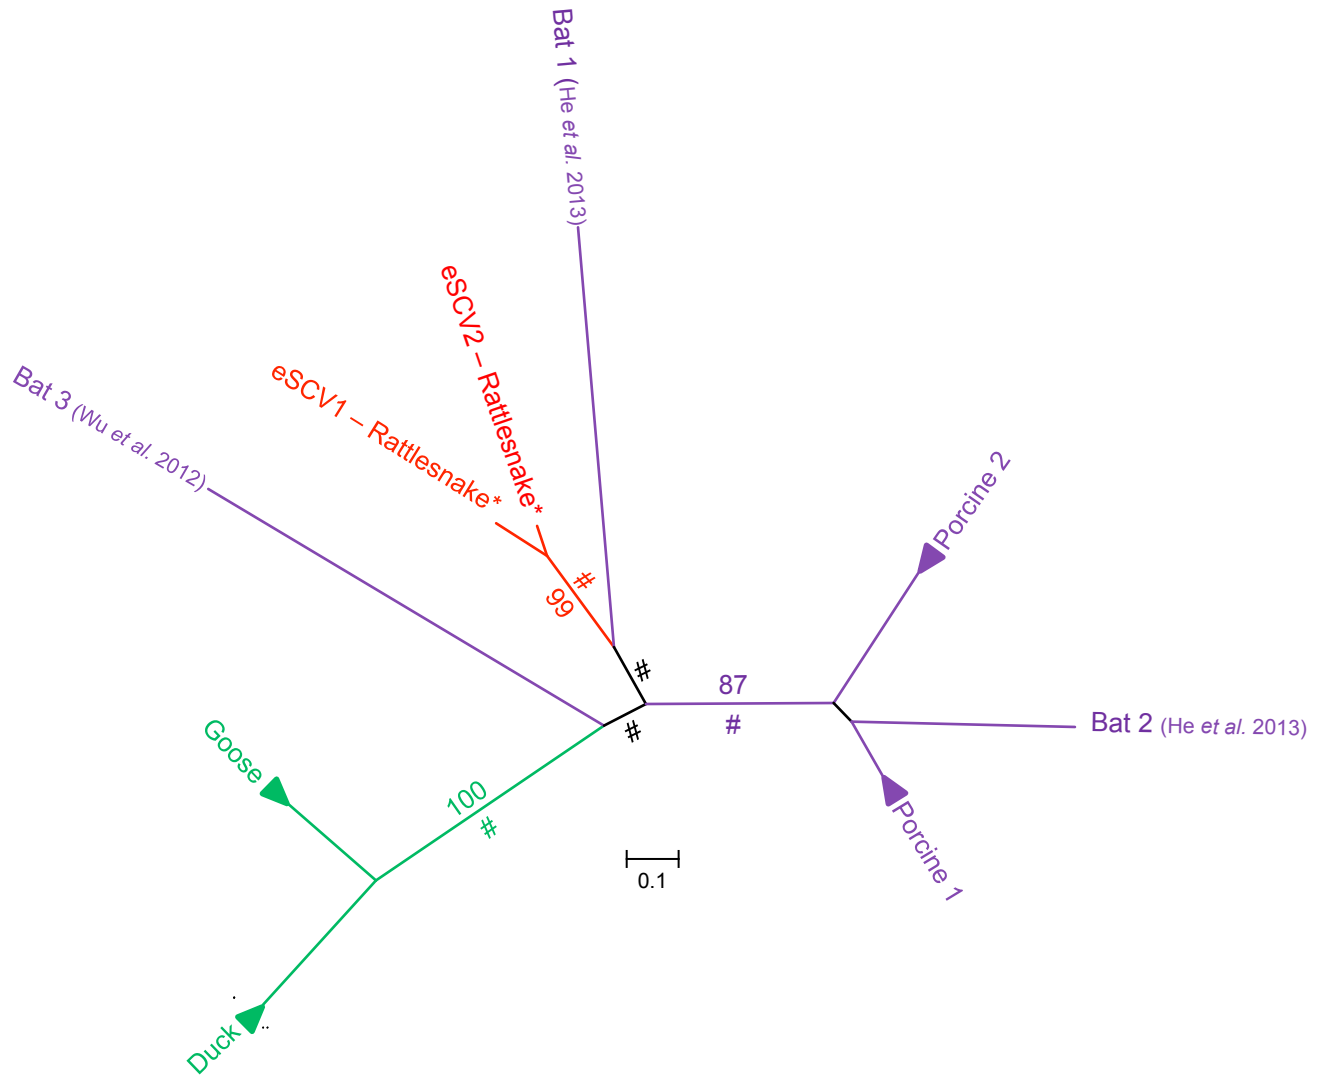

Supplement: rspb20141122supp2.pdf [file rspb20141122supp2.pdf]
