# Supplementary material
Source: PubMed Central journal article supplement (PMC4132678)
Supplement: rspb20141122supp3.pdf [file rspb20141122supp3.pdf]

|                      |        |               |                |                                                                                                                                                                                                                                                                                                                    |                           |
|----------------------|--------|---------------|----------------|--------------------------------------------------------------------------------------------------------------------------------------------------------------------------------------------------------------------------------------------------------------------------------------------------------------------|---------------------------|
| <i>C. mitchellii</i> | eSCV1  | contig_224958 | Circoviridae   | 180bp of 5' flank similar to python (90 bp upstream of EVE); locus absent in cobra; present in <i>C. aquilus</i> , <i>C. triseriatus</i> , <i>C. atrox</i> and <i>C. tigris</i> ; negative PCR in <i>A. contortrix</i>                                                                                             | CmCc58-R54/CmCc5854=742** |
| <i>C. mitchellii</i> | eSCV2  | contig_224959 | Circoviridae   | locus absent in python; clear empty site in cobra (both flanks present); absent in <i>A. contortrix</i> , <i>C. aquilus</i> and <i>C. triseriatus</i> ; present in <i>C. atrox</i> and <i>C. tigris</i>                                                                                                            | CmCc59-F54/CmCc5954=823   |
| <i>C. mitchellii</i> | eSCV3  | contig_9220   | Circoviridae   | Likely empty site in cobra = 257 bp of 5' flank similar to cobra (726bp upstream of EVE); 528bp of 3' flank similar to cobra (450bp downstream of EVE); locus absent in python; negative PCR in <i>A. contortrix</i> ; present in <i>C. aquilus</i> , <i>C. triseriatus</i> , <i>C. atrox</i> and <i>C. tigris</i> | CmCr20-F55/CmCr20-55=920  |
| <i>C. mitchellii</i> | eSCV4  | contig_24347  | Circoviridae   | clear empty site in cobra; 210 bp of 3' flank similar to python (810 bp downstream of EVE); absent in <i>A. contortrix</i> , negative PCR in <i>C. aquilus</i> and <i>C. triseriatus</i> ; present in <i>C. atrox</i> and <i>C. tigris</i>                                                                         | CmCr47-F55/CmCr47-R-5     |
| <i>C. mitchellii</i> | eSCV5  | contig_193549 | Circoviridae   | 550 bp of 3' flank similar to cobra (120bp downstream of EVE); 180bp of 3' flank similar to python (810 downstream of EVE); absent in <i>A. contortrix</i> , <i>C. aquilus</i> and <i>C. triseriatus</i> ; present in <i>C. atrox</i> and <i>C. tigris</i>                                                         | CmCr49-F55/CmCr49-R-5     |
| <i>C. mitchellii</i> | EBLN1  | contig_173953 | Bornaviridae   | locus absent in cobra and python; negative PCR in <i>A. contortrix</i> ; present in <i>C. aquilus</i> , <i>C. triseriatus</i> , <i>C. atrox</i> and <i>C. tigris</i>                                                                                                                                               | NA                        |
| <i>C. mitchellii</i> | EBLN2  | contig_72541  | Bornaviridae   | locus absent in cobra and python; present in <i>A. contortrix</i> , <i>C. aquilus</i> ; <i>C. triseriatus</i> ; negative PCR in <i>C. atrox</i> and <i>C. tigris</i> .                                                                                                                                             | CmB41-F153/CmB41-I54=1270 |
| <i>C. mitchellii</i> | eSHBV1 | contig_93260  | Hepadnaviridae | Presence of orthologous EVE in Cobra ; 705 bp of 5' flank similar to python (10 bp upstream of EVE)                                                                                                                                                                                                                | not tested                |
| <i>C. mitchellii</i> | eSHBV2 | contig_192207 | Hepadnaviridae | 250 bp of 3' flank similar to python and cobra (75 bp downstream of EVE); negative PCR in <i>A. contortrix</i> and <i>C. atrox</i> ; present in <i>C. aquilus</i> , <i>C. triseriatus</i> and <i>C. tigris</i>                                                                                                     | NA                        |
| <i>P. molurus</i>    | eSCV6  | AEQU02103080  | Circoviridae   | locus absent in two other snake genomes                                                                                                                                                                                                                                                                            | not tested                |
| <i>P. molurus</i>    | EBLN3  | AEQU02058304  | Bornaviridae   | 132 bp of 5' flank similar to rattle snake (1164 bp upstream of EVE)                                                                                                                                                                                                                                               | not tested                |
| <i>O. hannah</i>     | eSHBV1 | AZIM01000853  | Hepadnaviridae | presence of EVE at orthologous locus in rattlesnake ; 500 bp of 5' flank similar to python                                                                                                                                                                                                                         | not tested                |
| <i>O. hannah</i>     | eSHBV3 | AZIM01007891  | Hepadnaviridae | locus absent in two other snake genomes                                                                                                                                                                                                                                                                            | not tested                |

NA = not applicable, meaning that it was not possible to design primers because of the flanking region is absent in the current *C. mitchellii* genome as

\* The sequence of the primers is provided in Supplementary Dataset 2.

\*\* For each primer pair. the expected size of the PCR product if the EVE is present is indicated in base pairs.

**Supplementary Table 2.** Voucher numbers of the tissue samples used in this study.

| <b>Genus</b>       | <b>Species</b>     | <b>Subfamily</b> | <b>Voucher number</b> |
|--------------------|--------------------|------------------|-----------------------|
| <i>Crotalus</i>    | <i>aquilus</i>     | Crotalinae       | CA122                 |
| <i>Crotalus</i>    | <i>tigris</i>      | Crotalinae       | KWS 252               |
| <i>Crotalus</i>    | <i>atrox</i>       | Crotalinae       | JMM 689               |
| <i>Agkistrodon</i> | <i>contortrix</i>  | Crotalinae       | JMM 734               |
| <i>Crotalus</i>    | <i>triseriatus</i> | Crotalinae       | CT2                   |
